# Supplementary material for: Practical synthesis of trans-dihydroxybutyrolactols as chiral C4 building blocks and their application to the synthesis of polyhydroxylated alkaloids
Source: Royal Society of Chemistry journal article supplement (doi:10.1039/c3ra43232g), 2013-01-01

# **Practical Synthesis of *trans*-Dihydroxybutyrolactols as Chiral C<sub>4</sub> Building Blocks and Their Application to the Synthesis of Polyhydroxylated Alkaloids**

**Jing Zeng,<sup>a</sup> Qian Zhang,<sup>a</sup> Hong-Kui Zhang,<sup>\*a</sup> and Anqi Chen<sup>\*b</sup>**

<sup>a</sup> Department of Chemistry and the Key Laboratory for Chemical Biology of Fujian Province, College of Chemistry and Chemical Engineering, Xiamen University, Fujian 361005, P. R. China. Email: hkzhang@xmu.edu.cn.

<sup>b</sup> Current address: Institute of Chemical and Engineering Sciences, 8 Biomedical Grove, Neuros, #07-01, Singapore 138665. Email: chen\_anqi@ices.a-star.edu.sg.

**Supplementary Information**  
**Copies of <sup>1</sup>H and <sup>13</sup>C NMR Spectra**

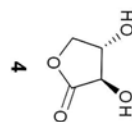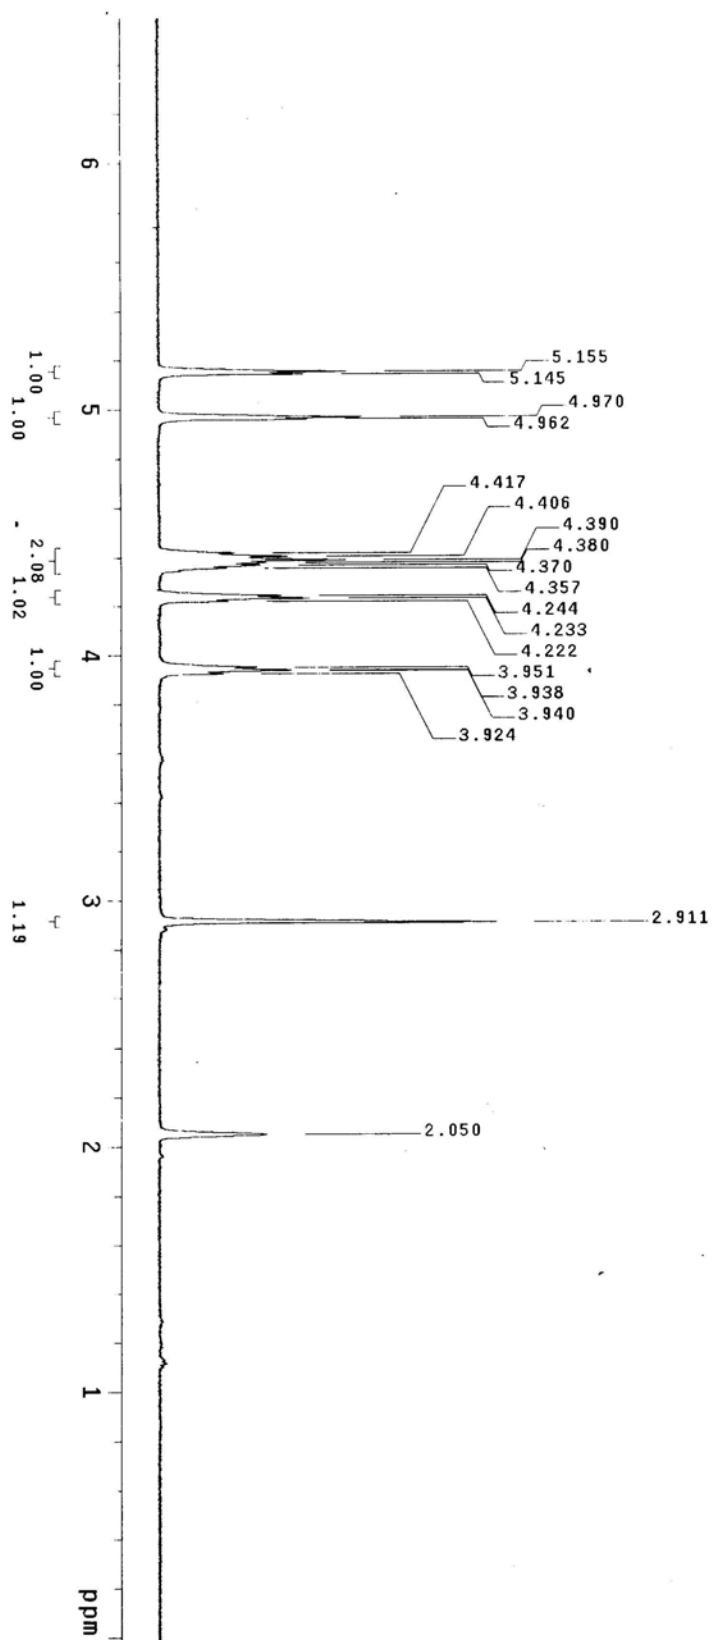

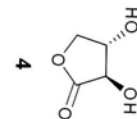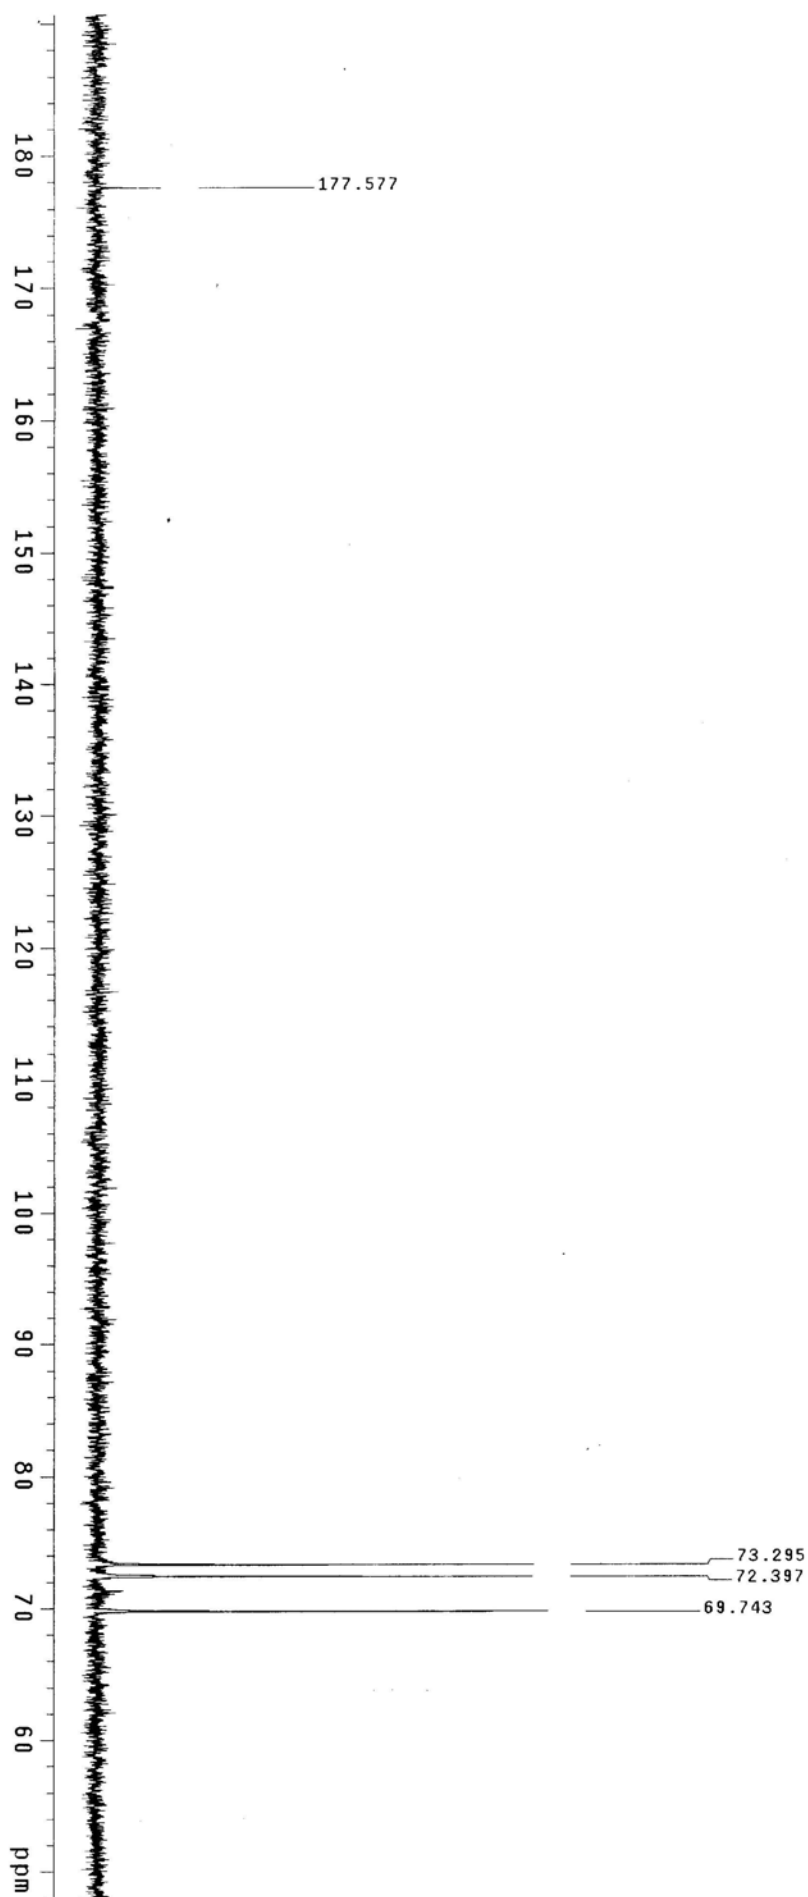

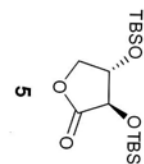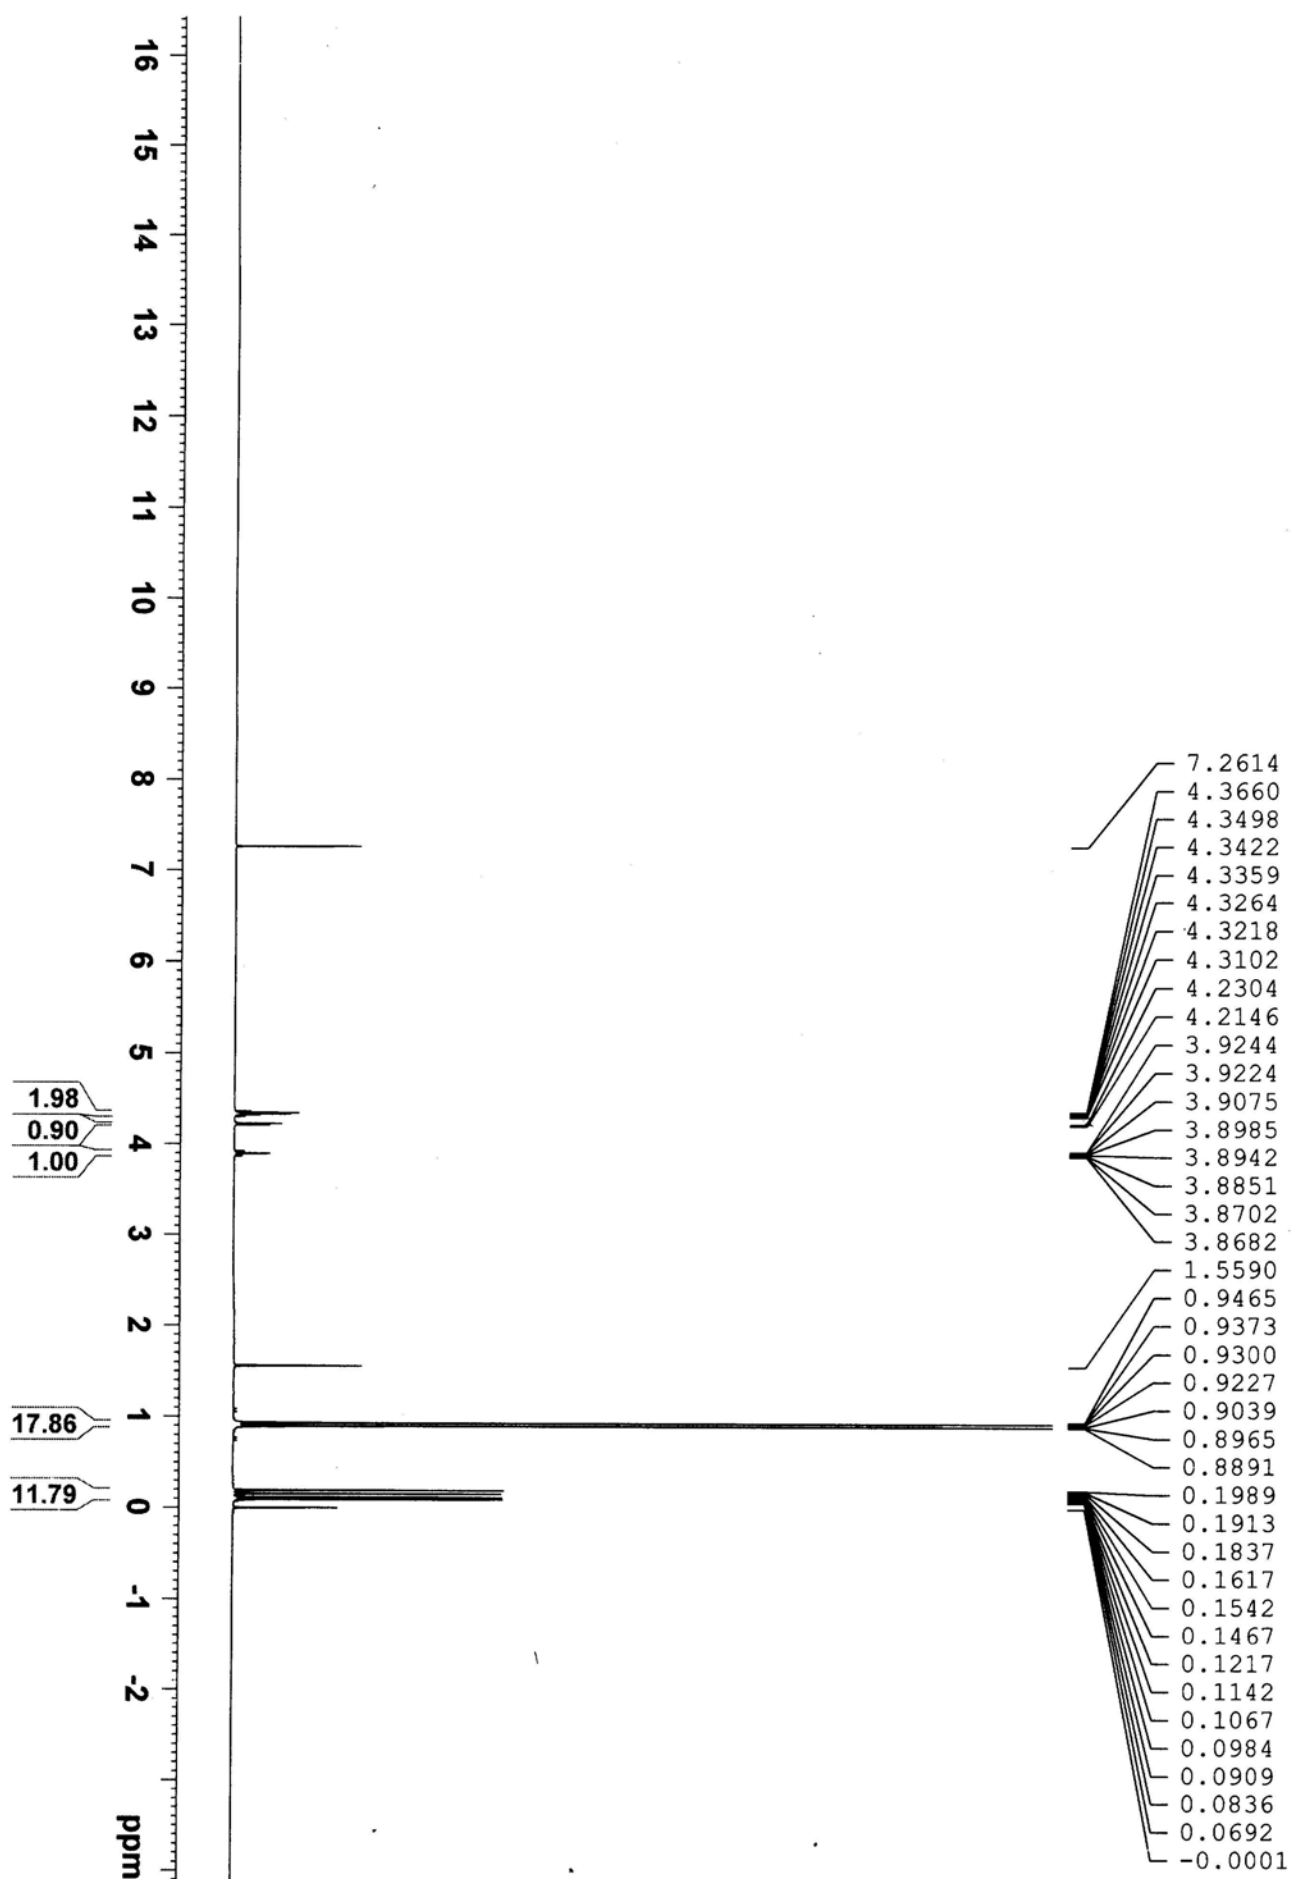



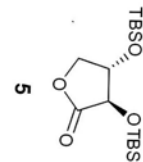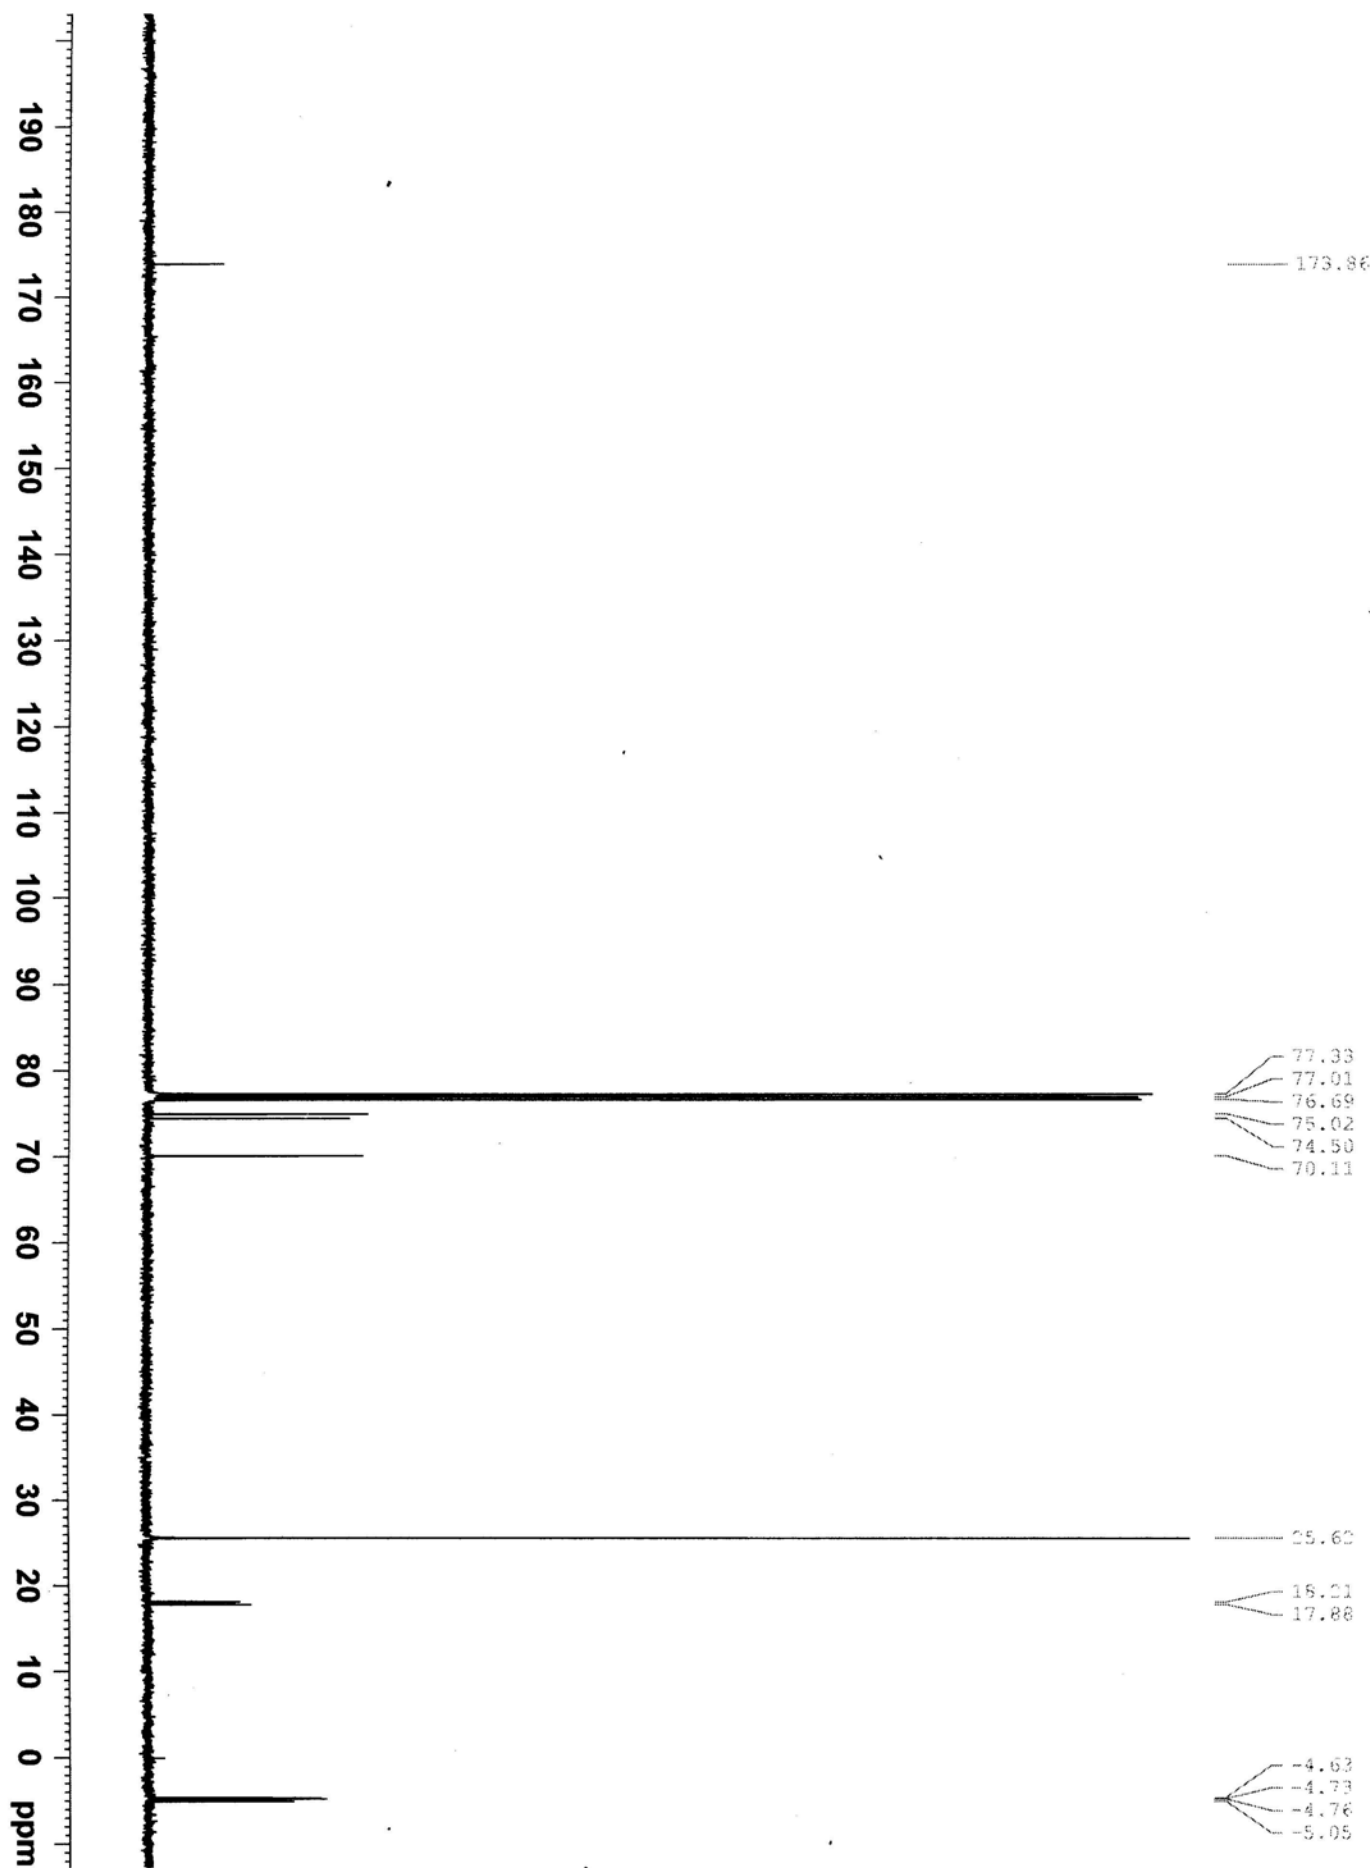

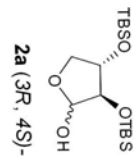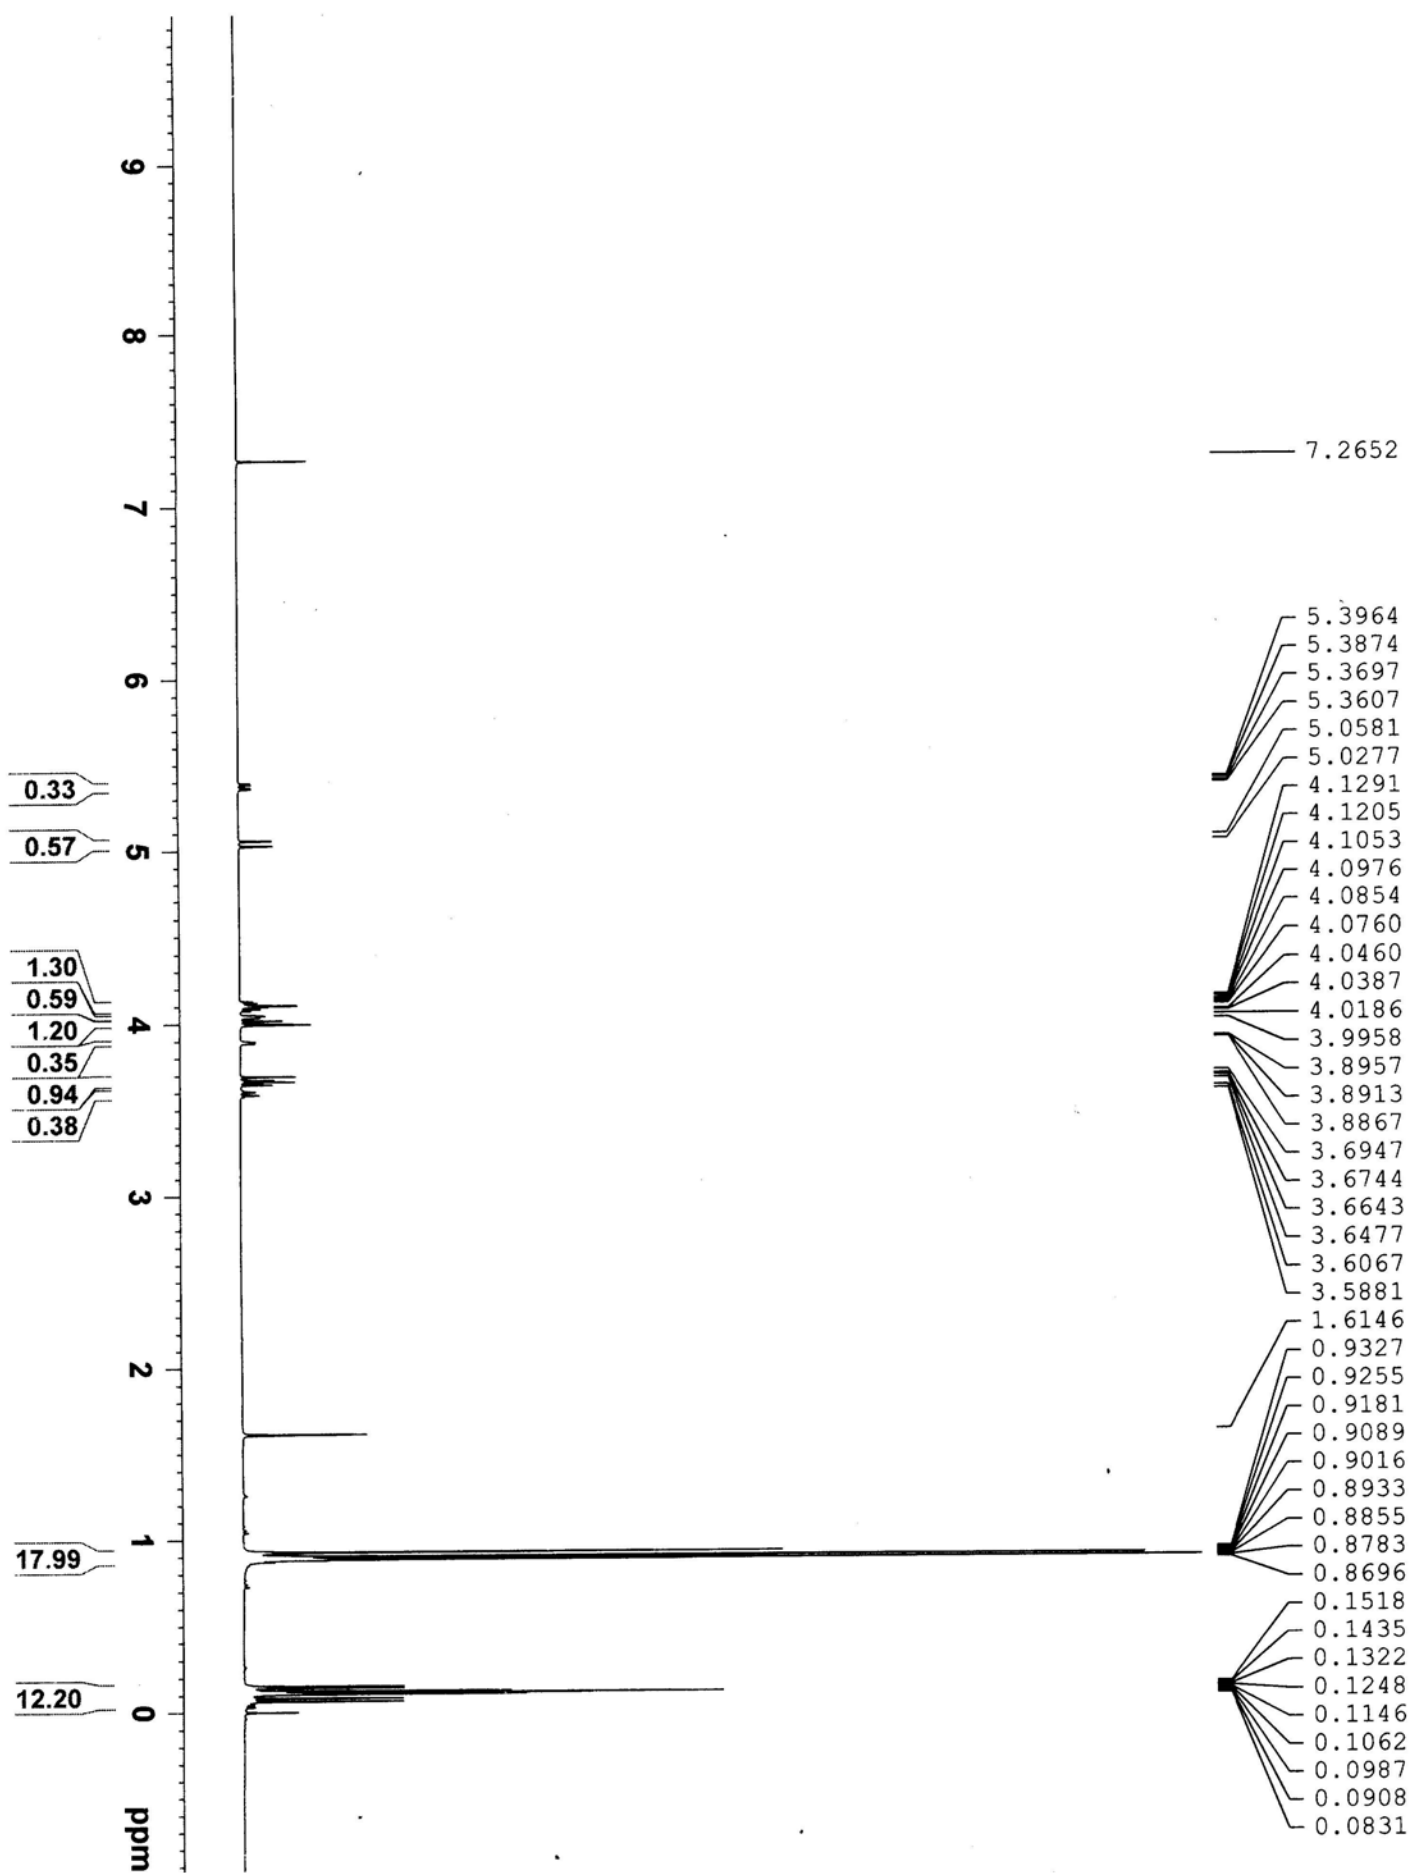

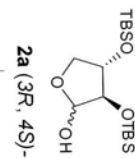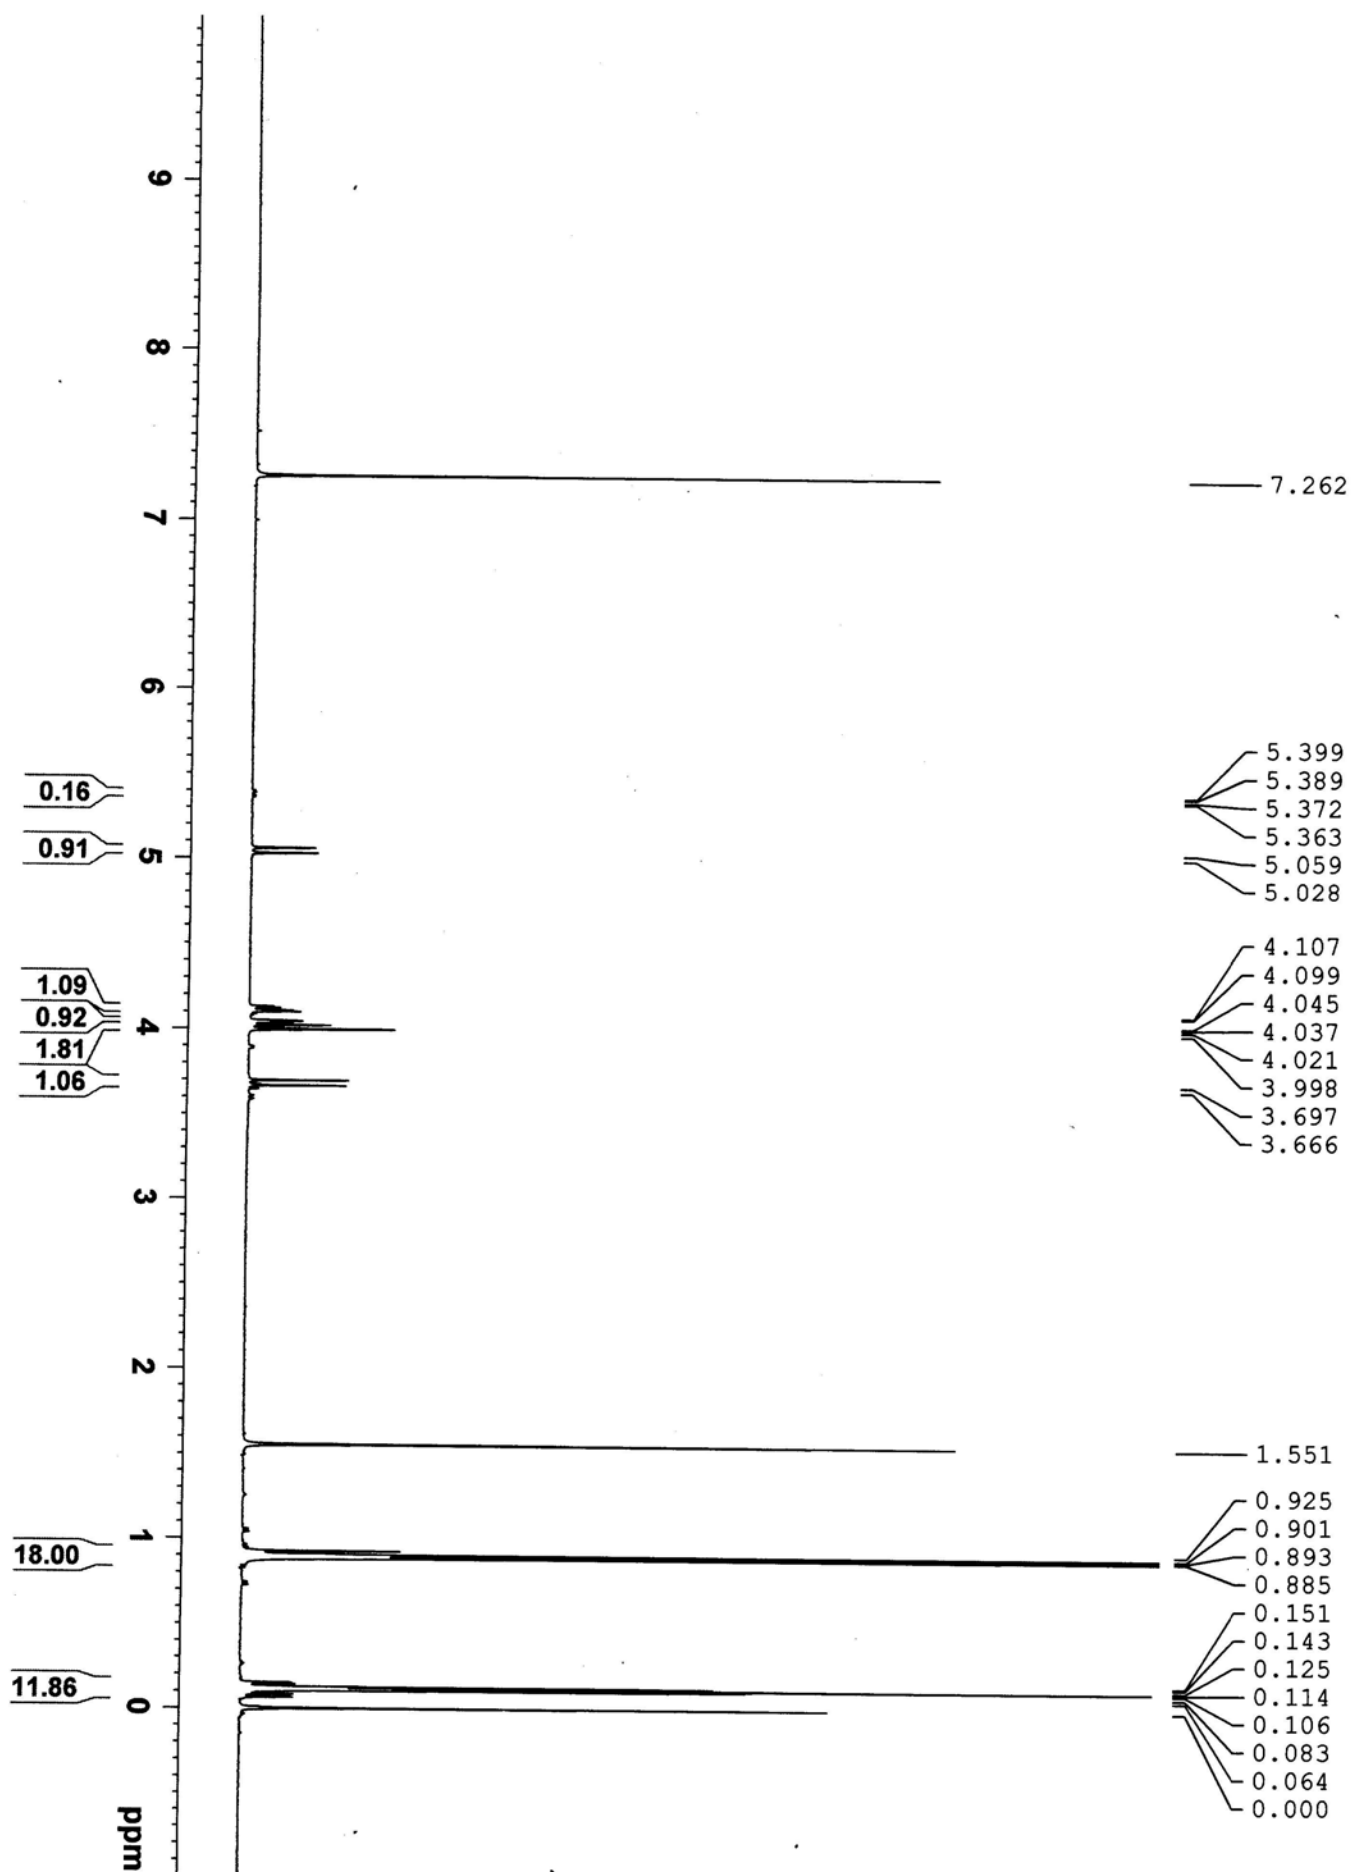

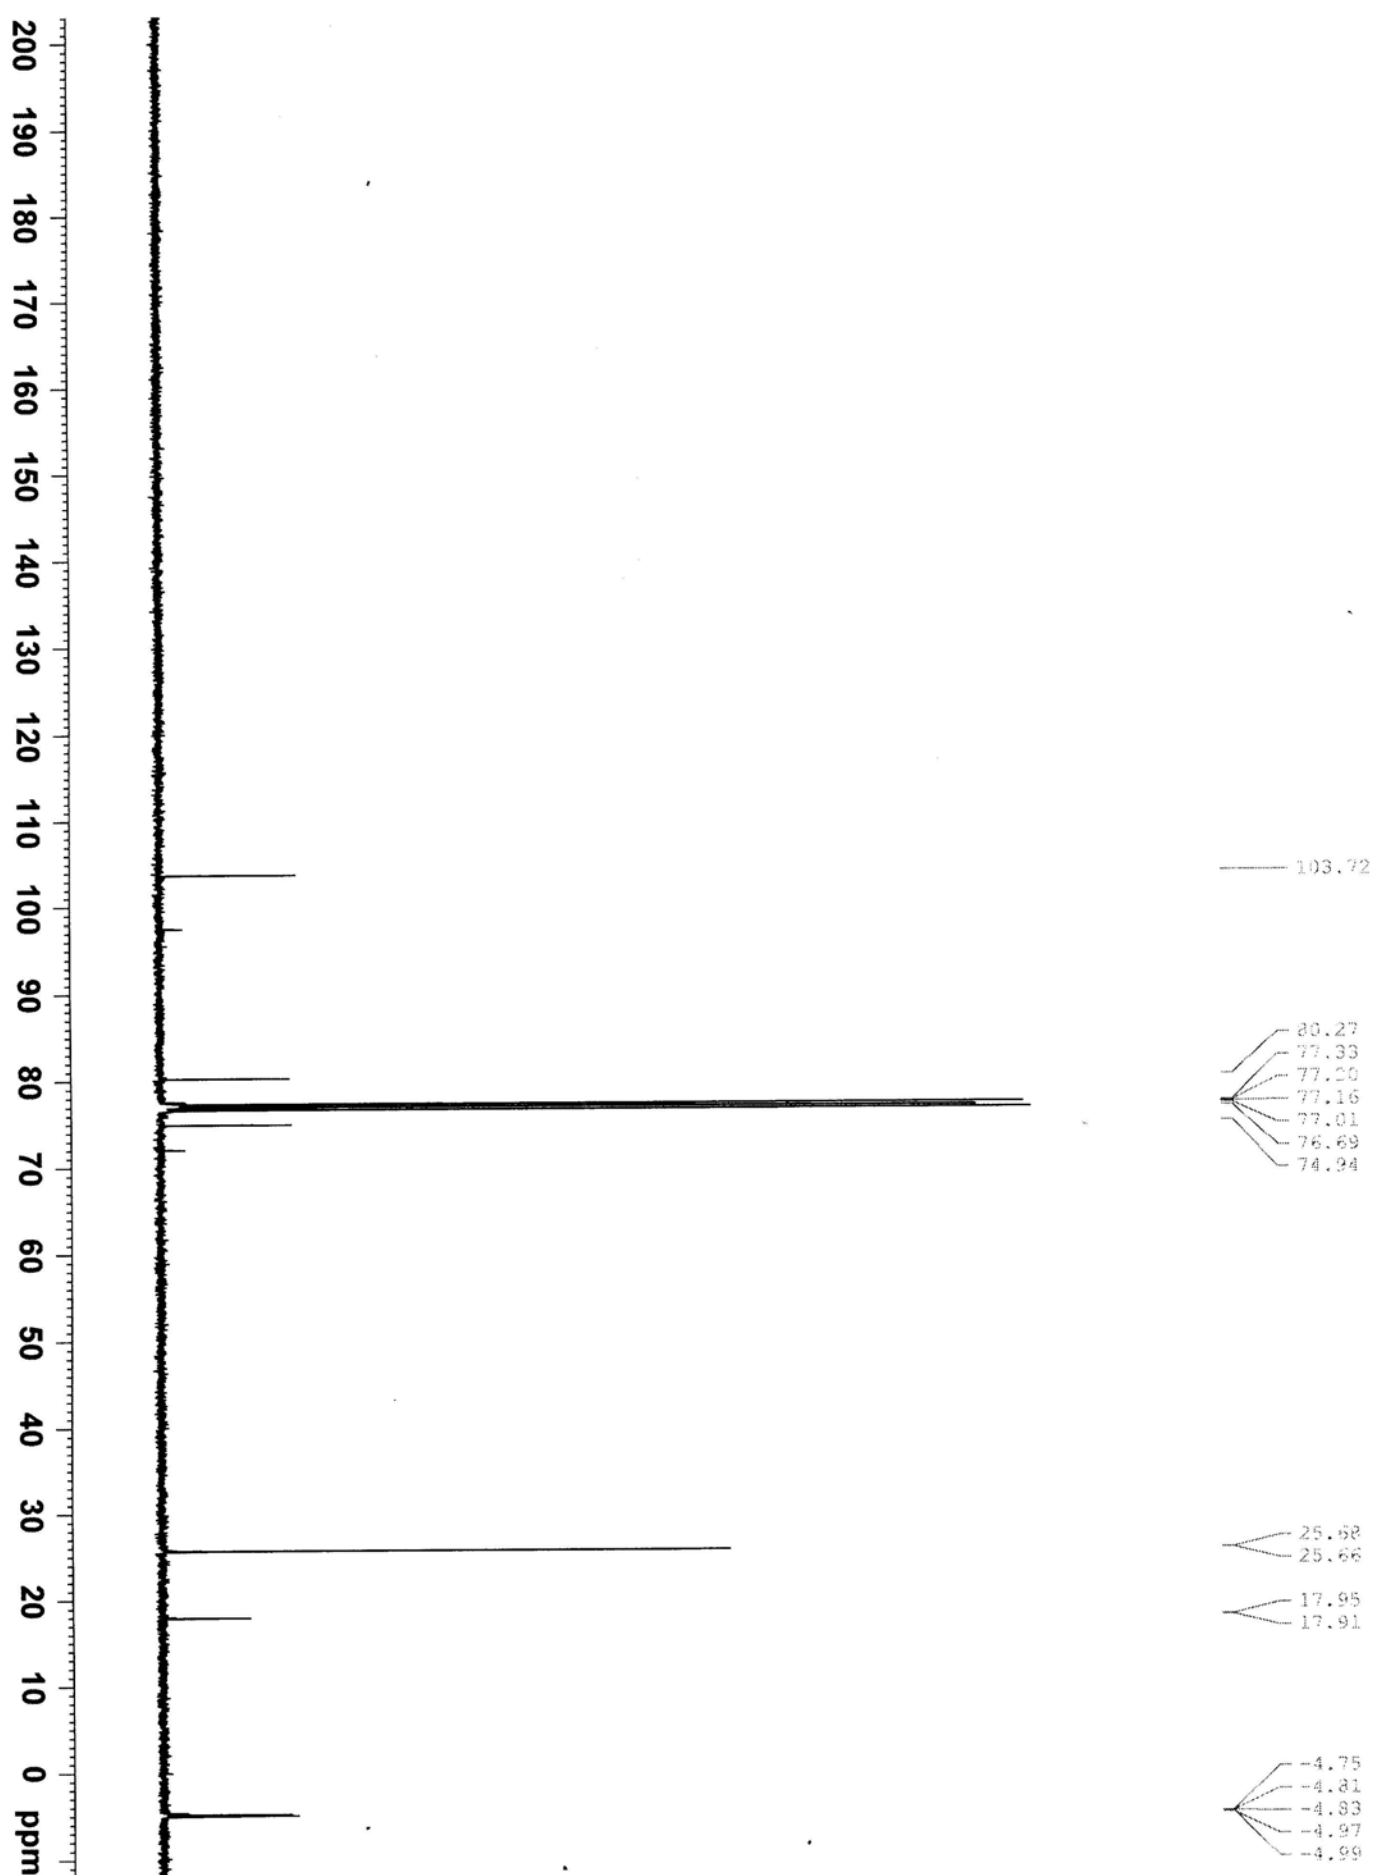

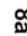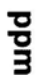

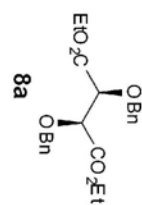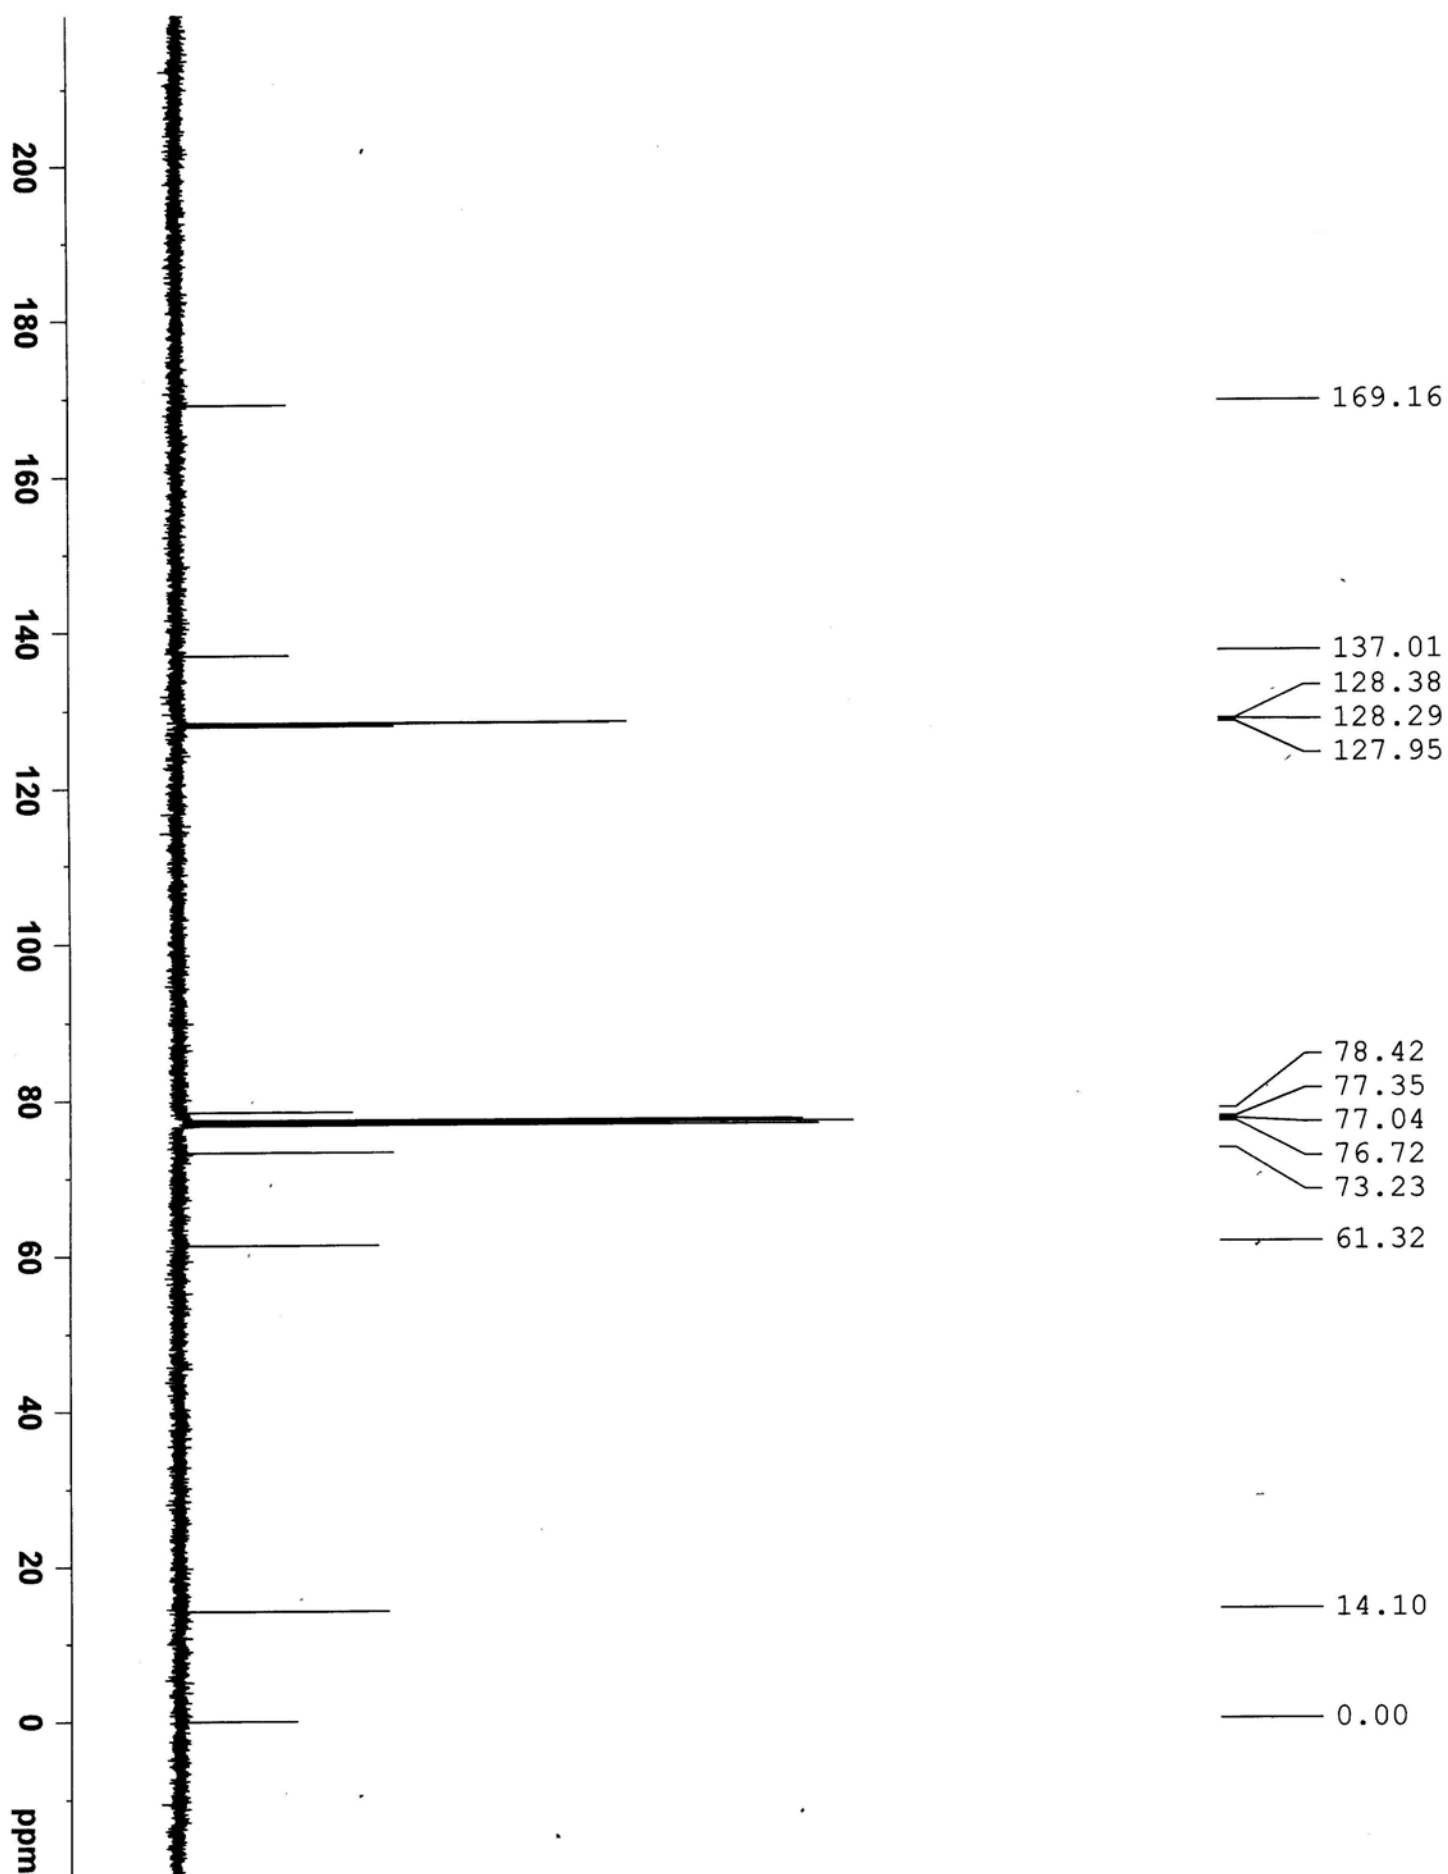

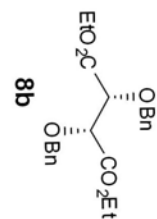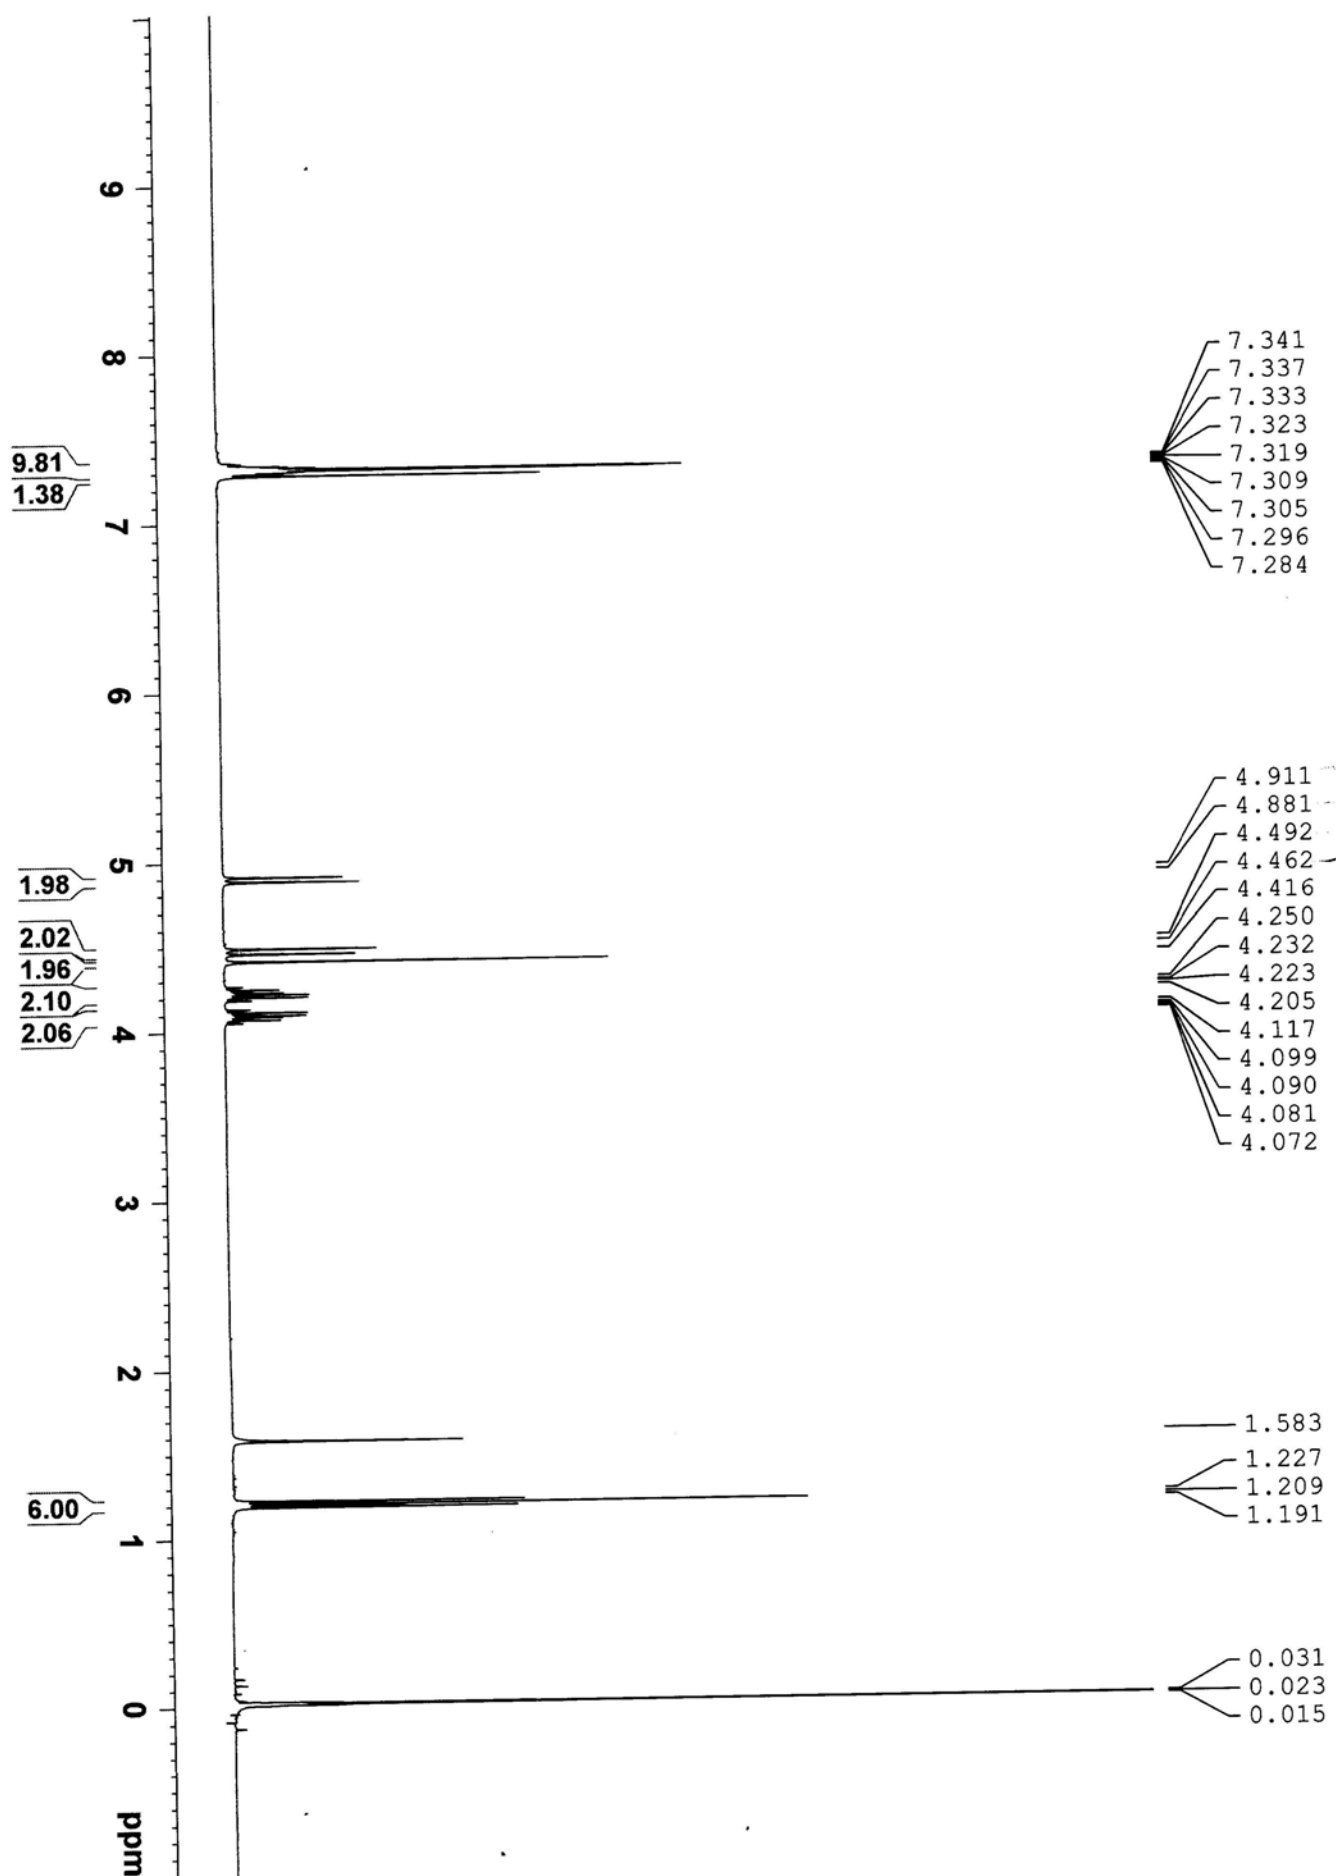

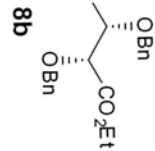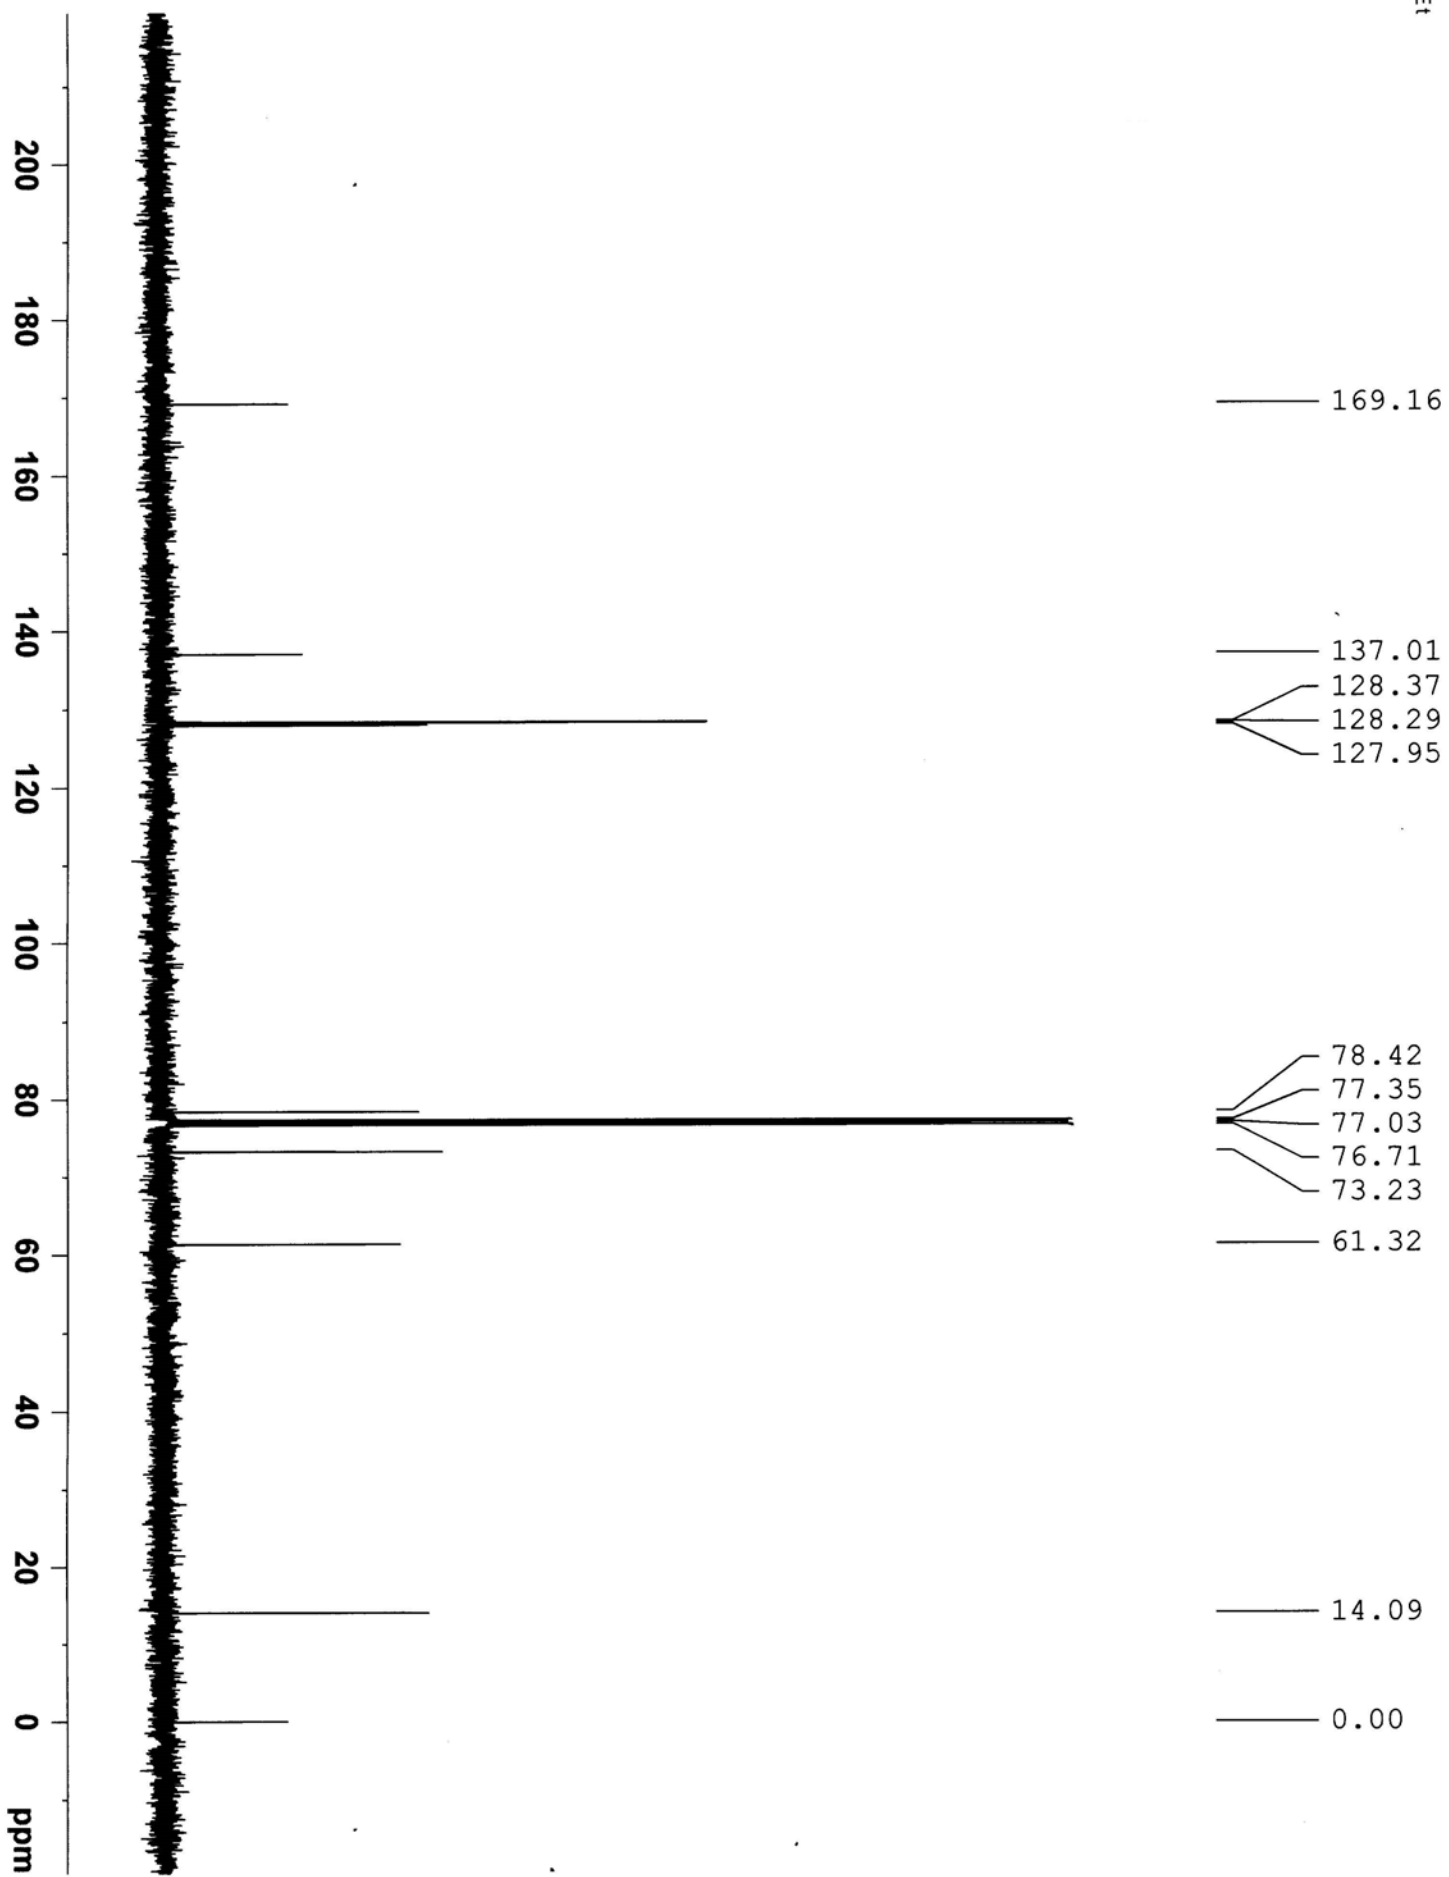



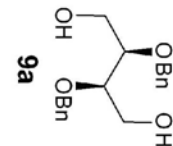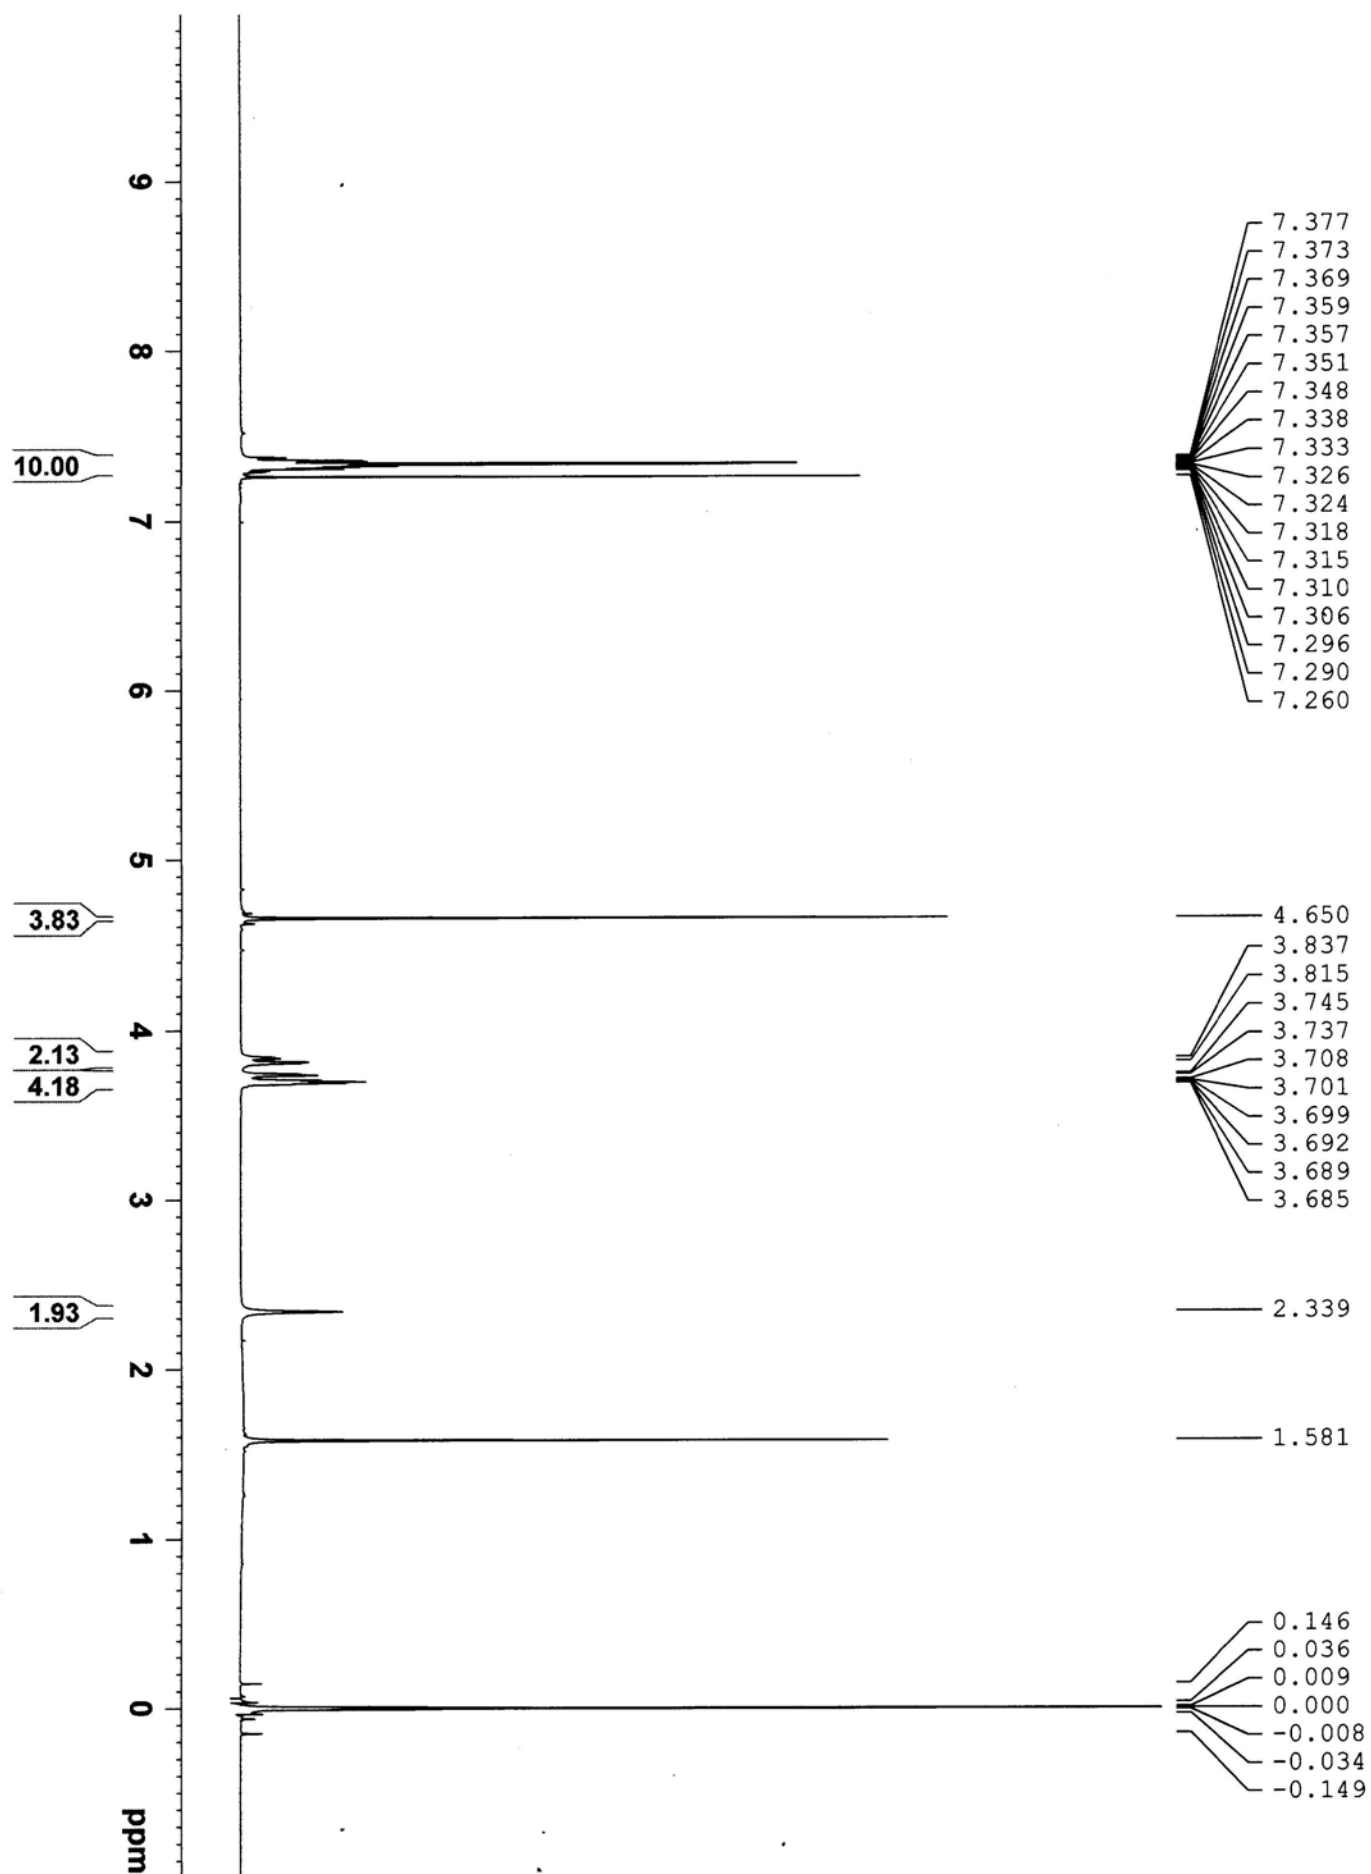

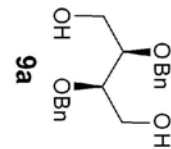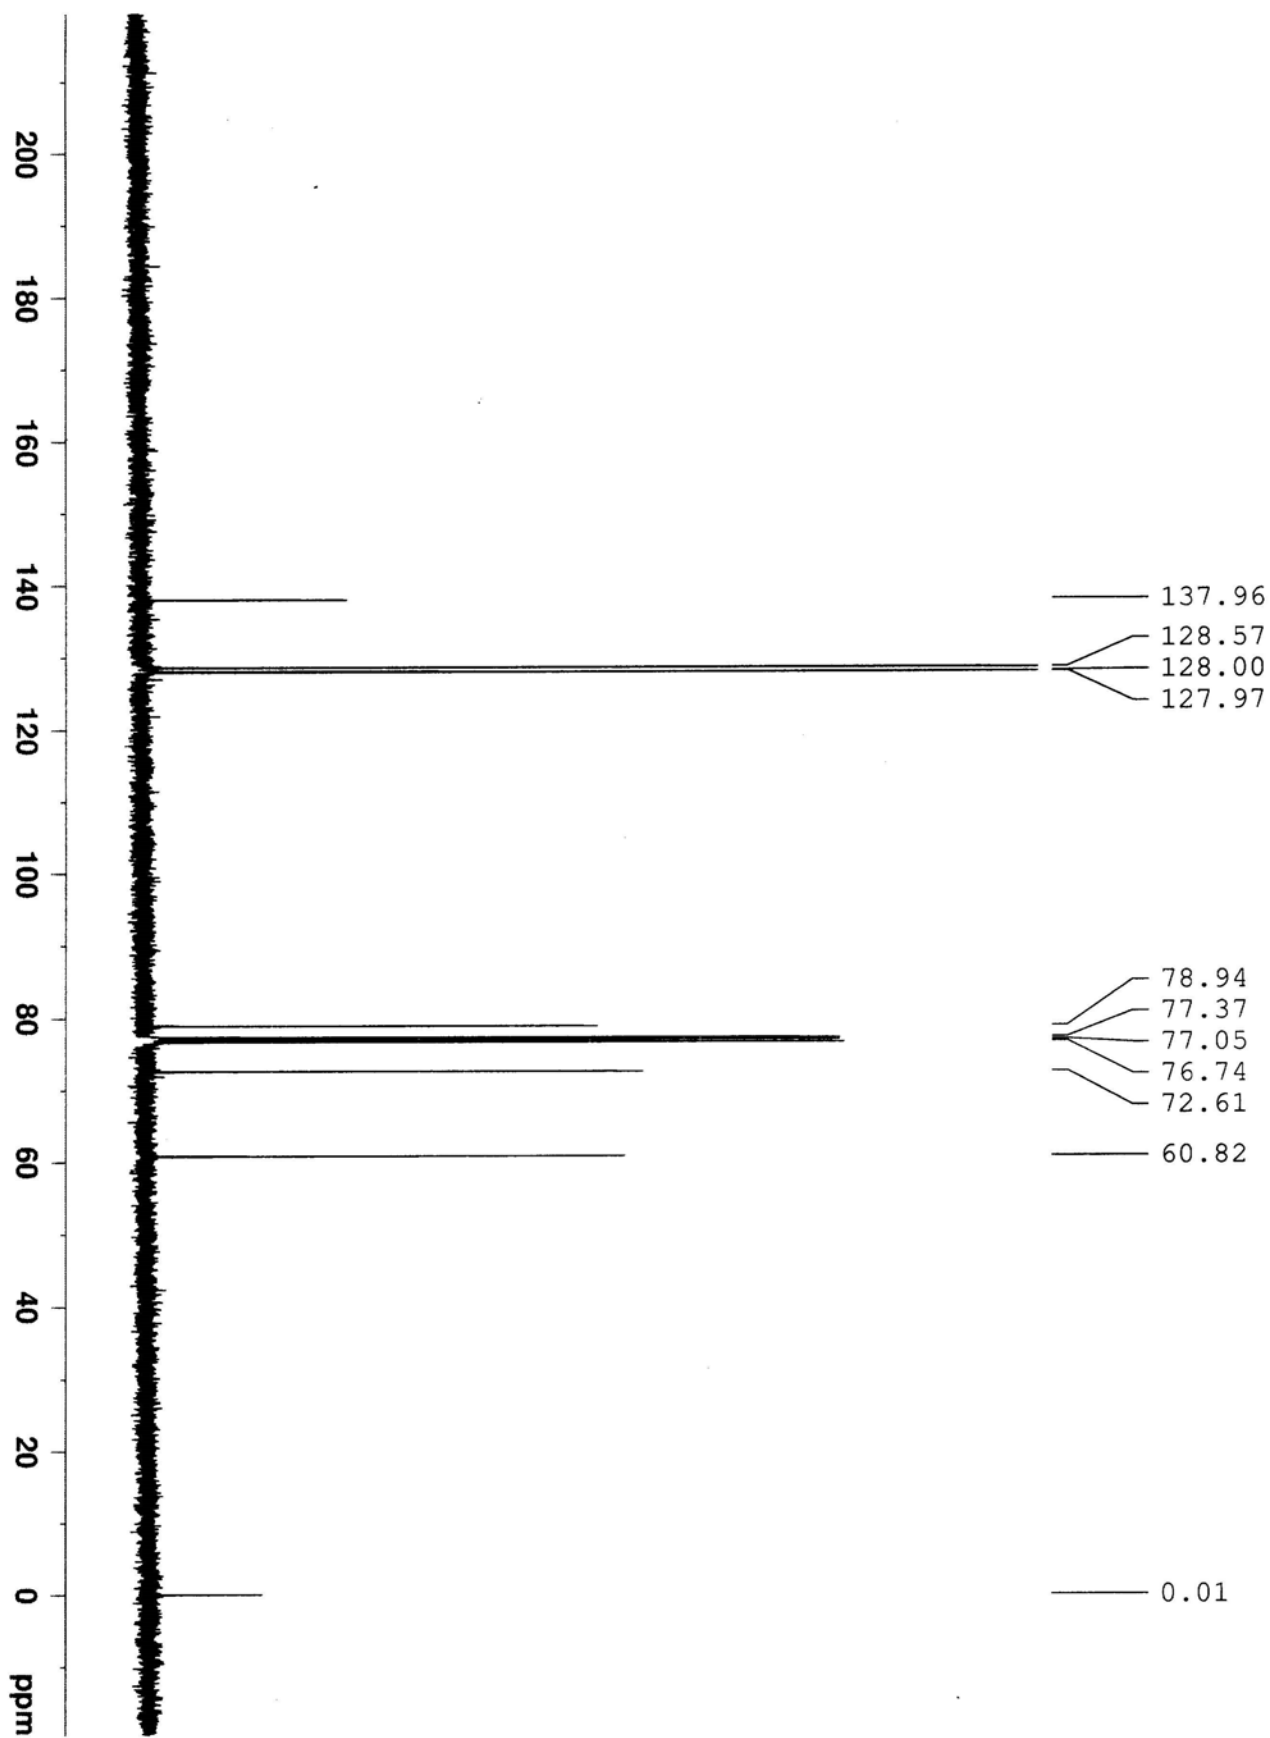

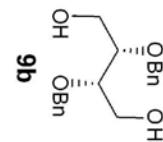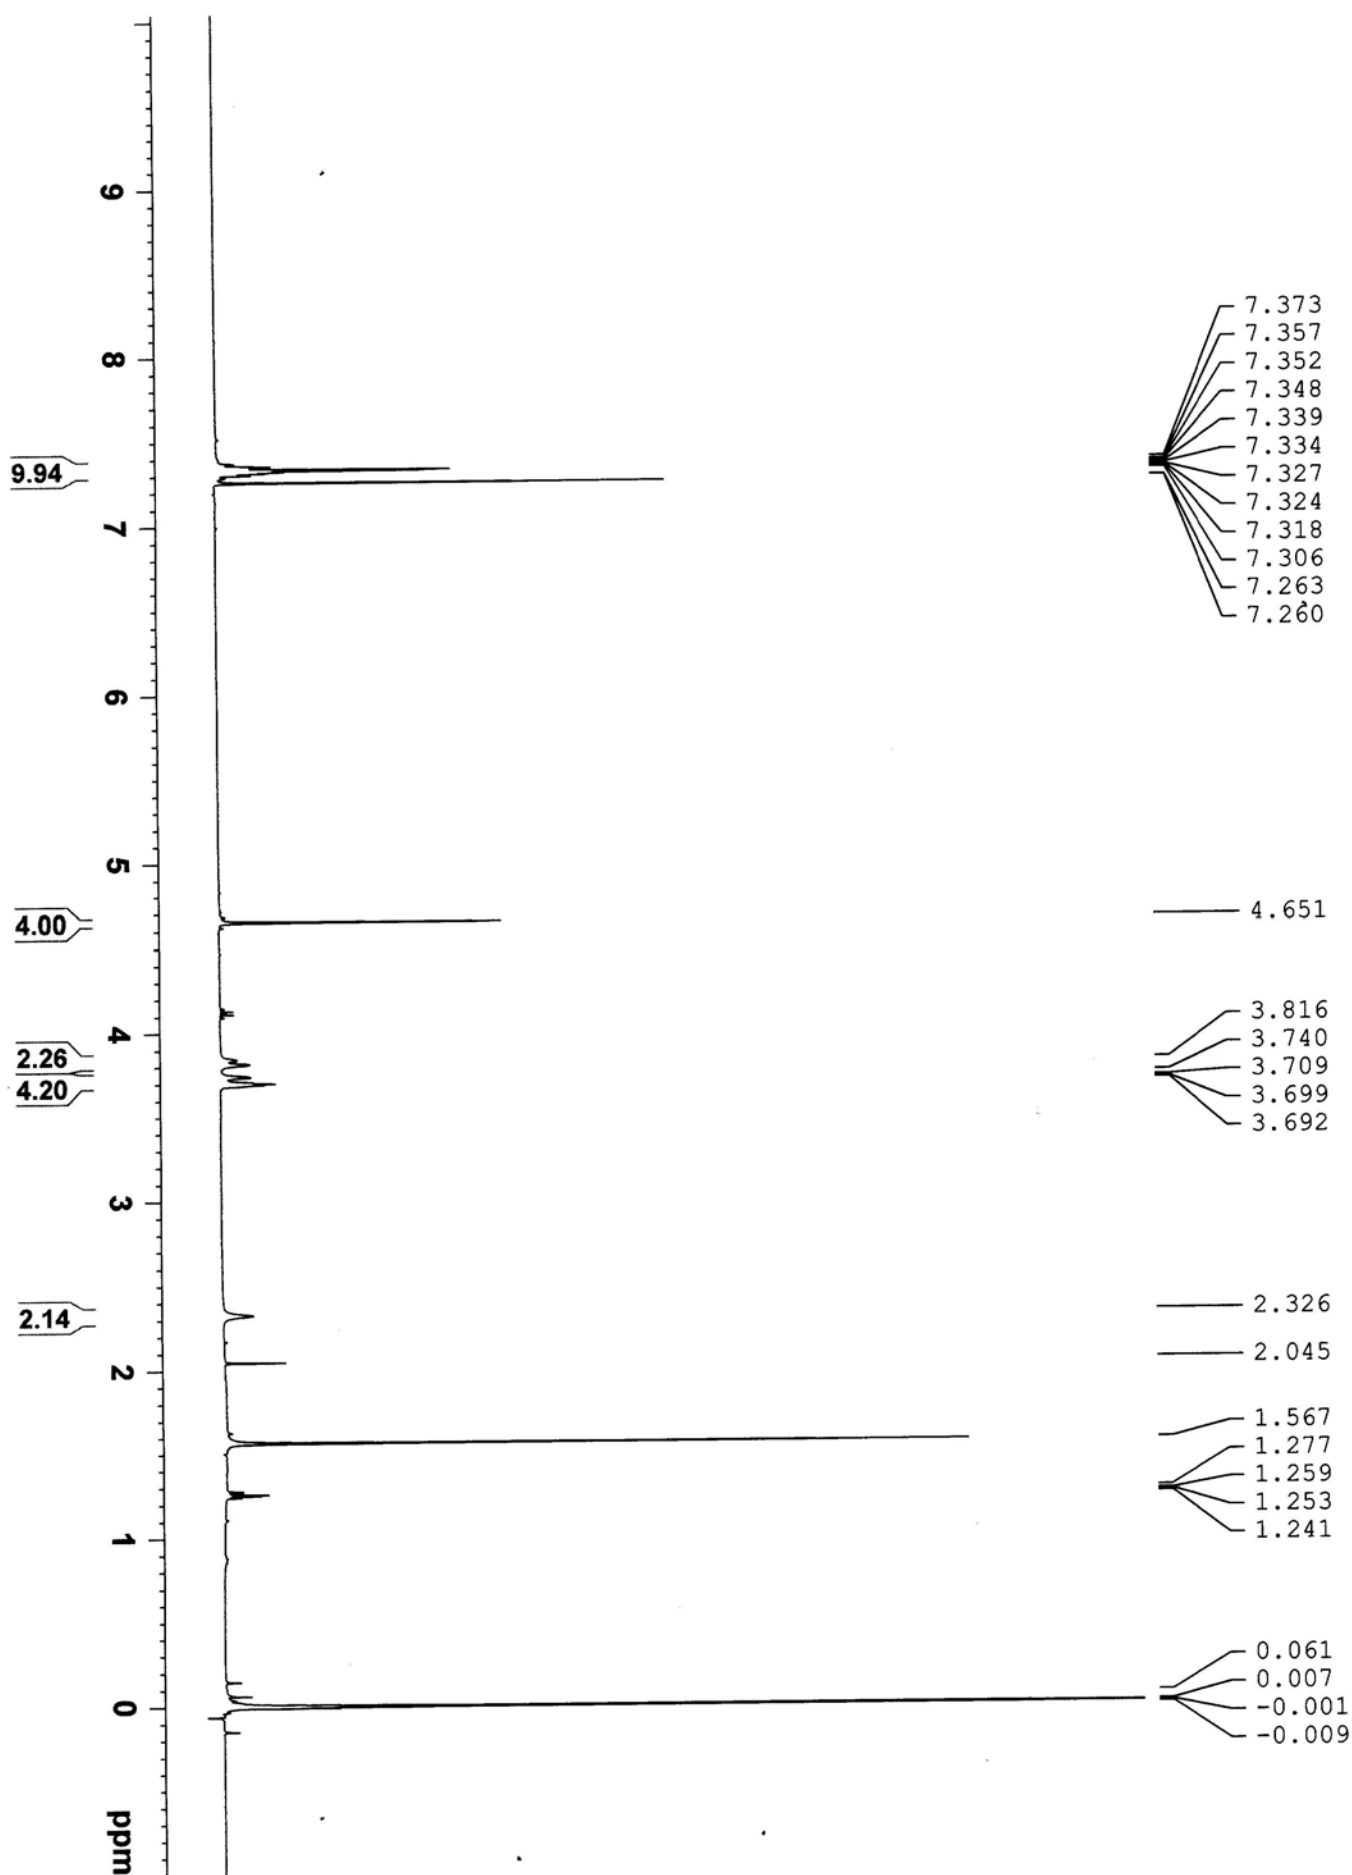

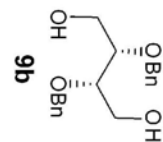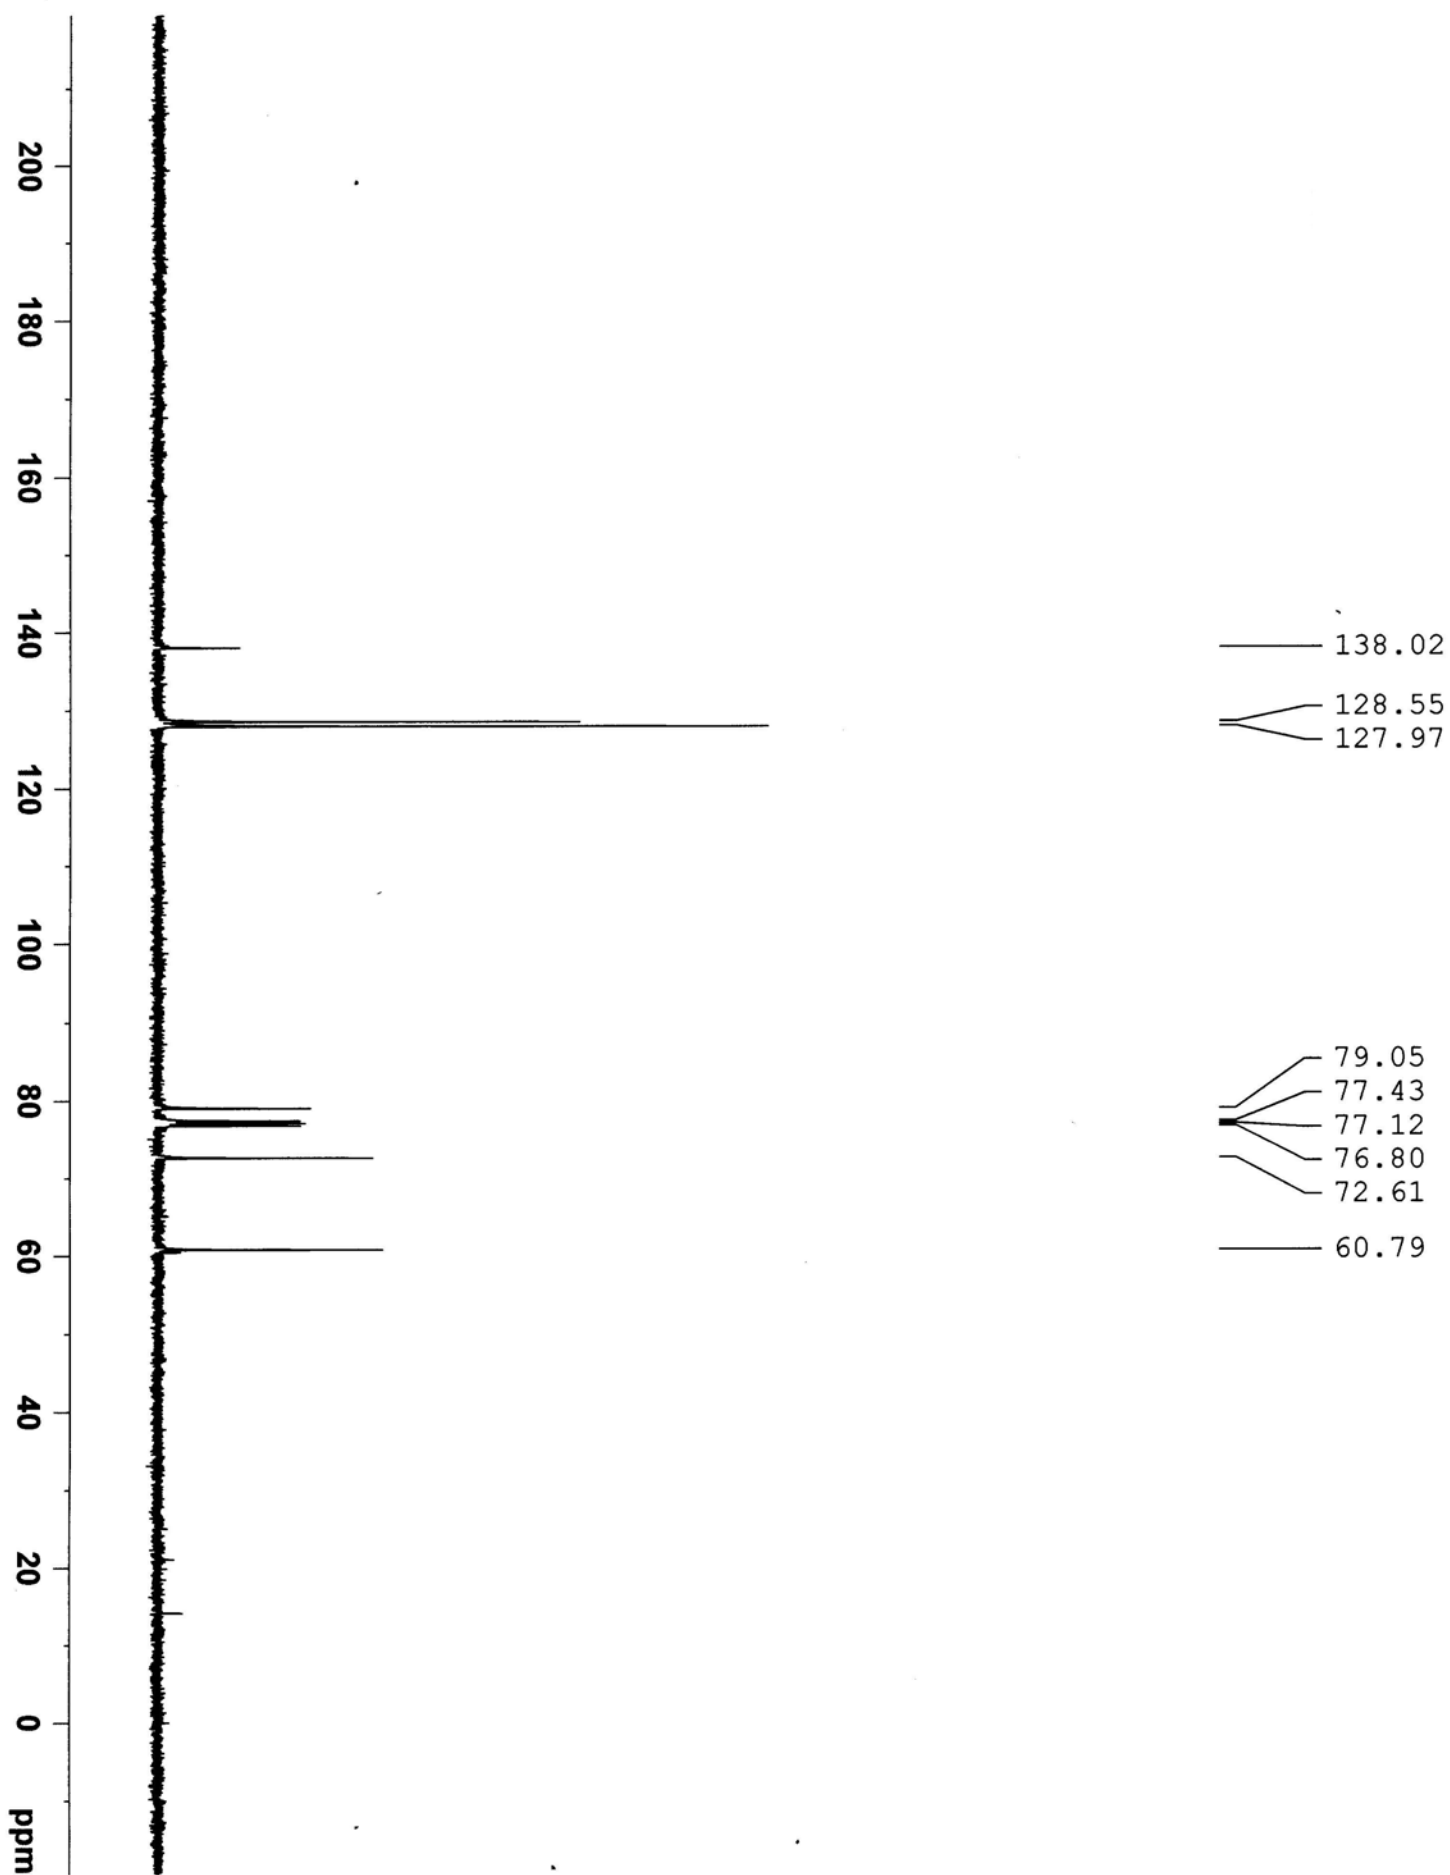

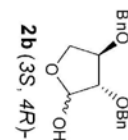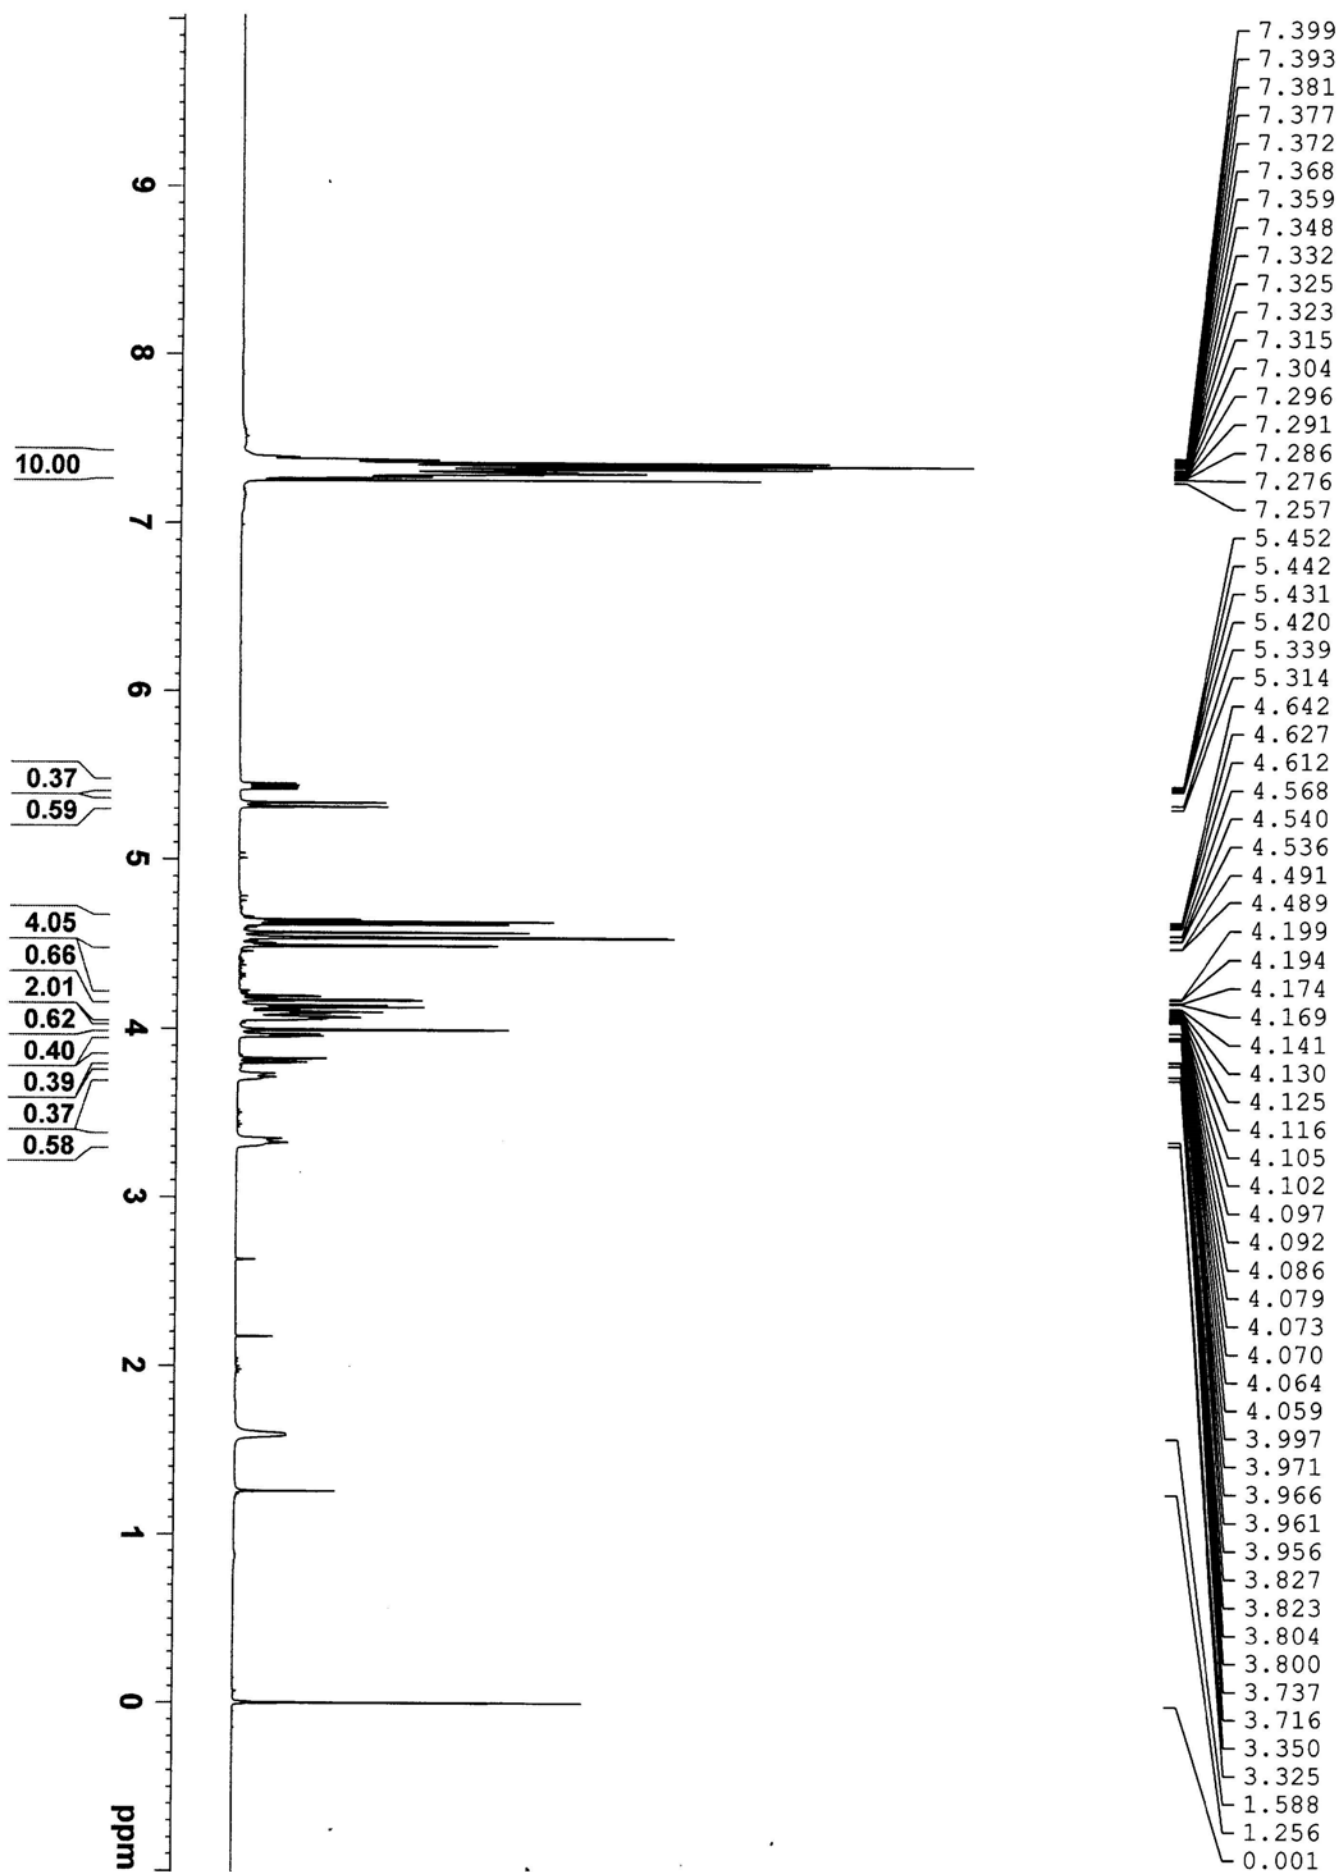

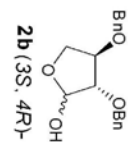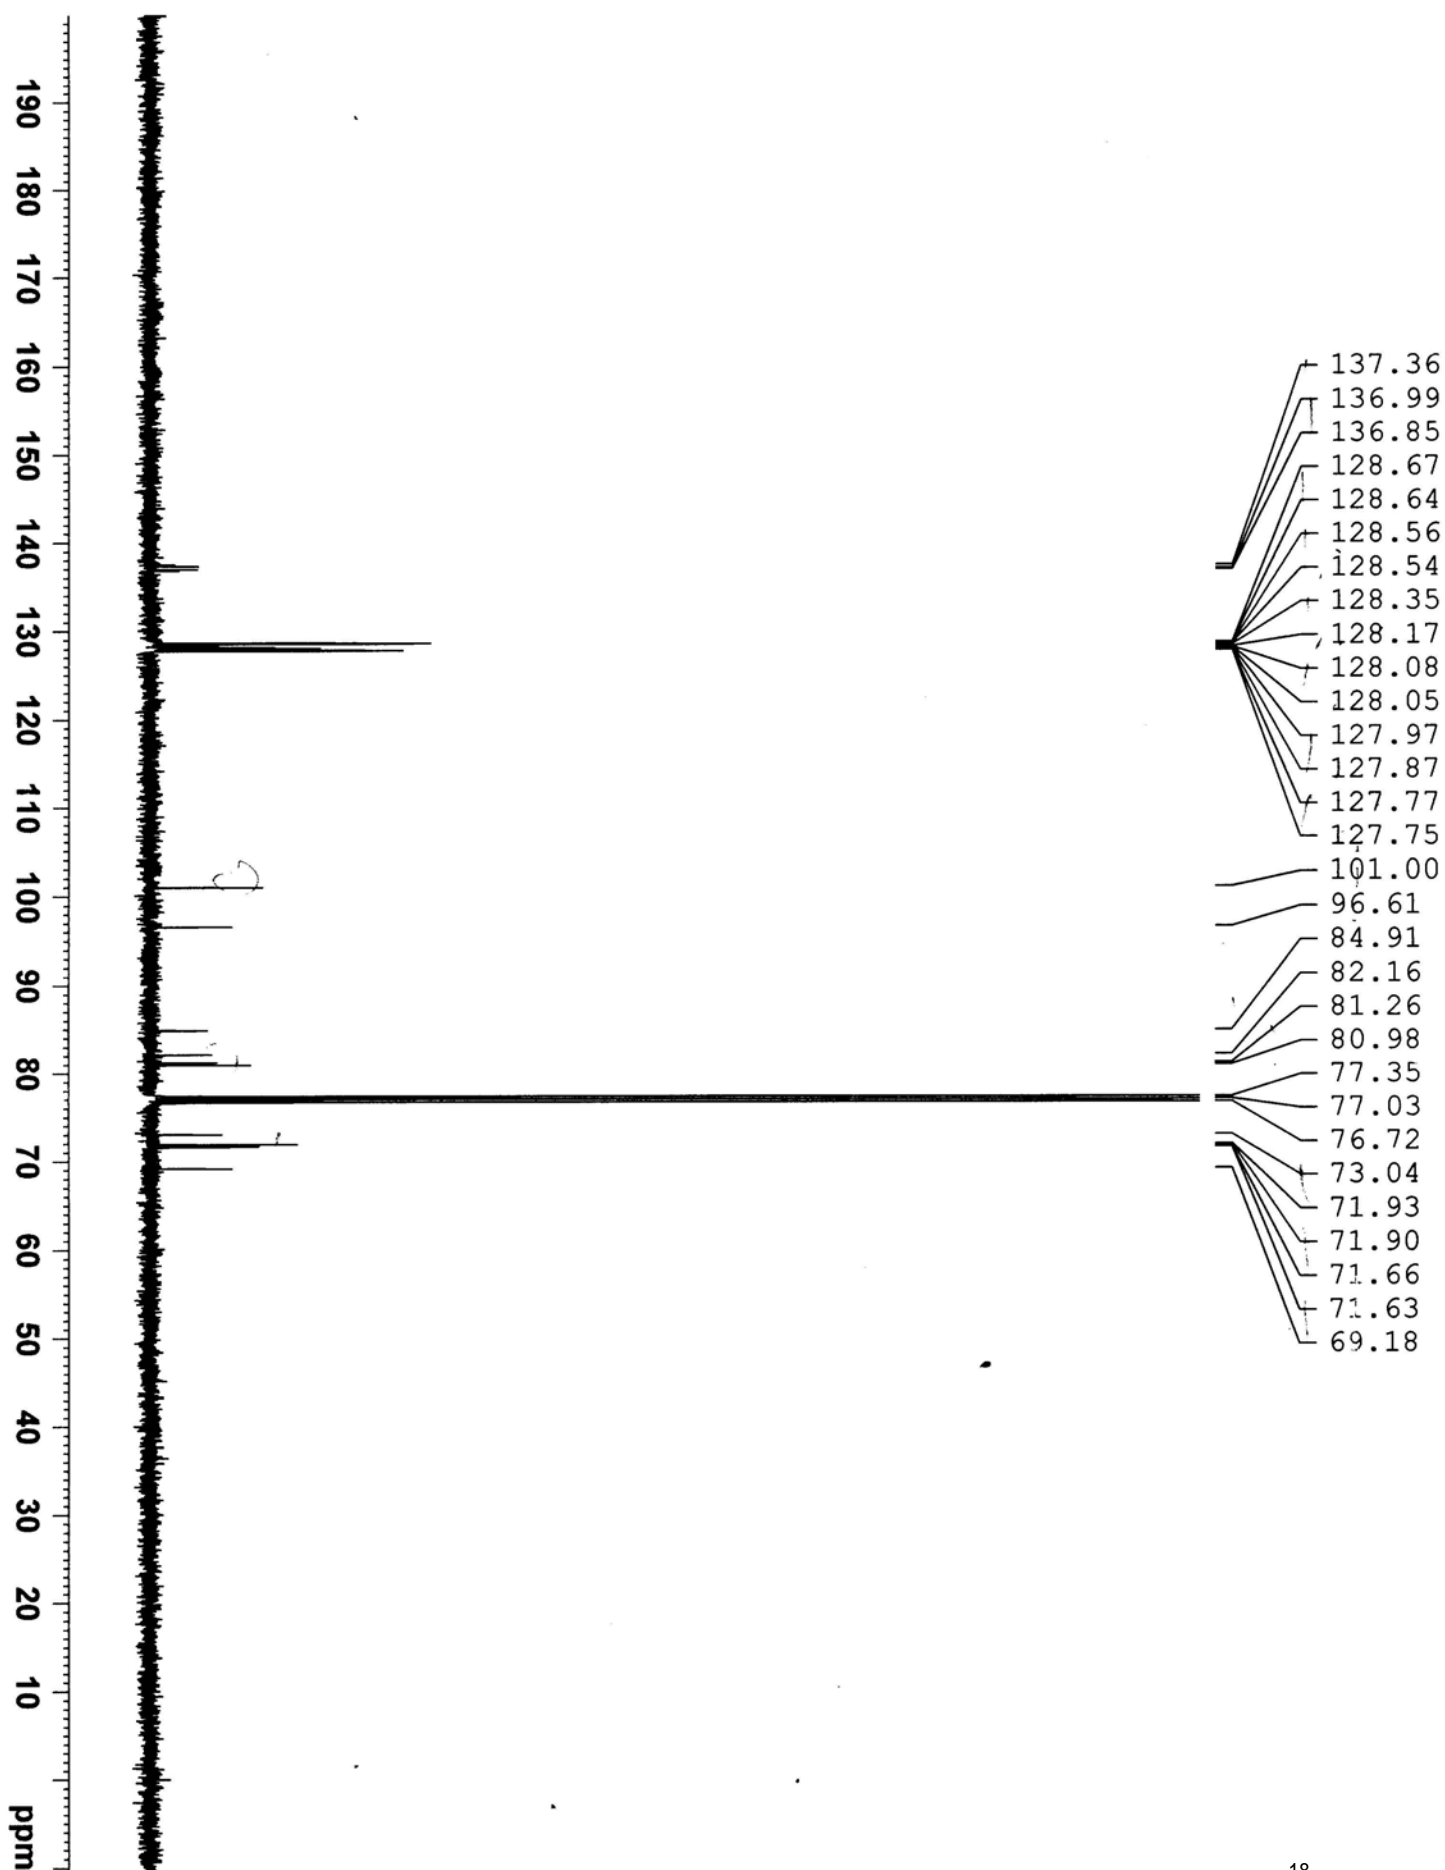

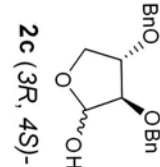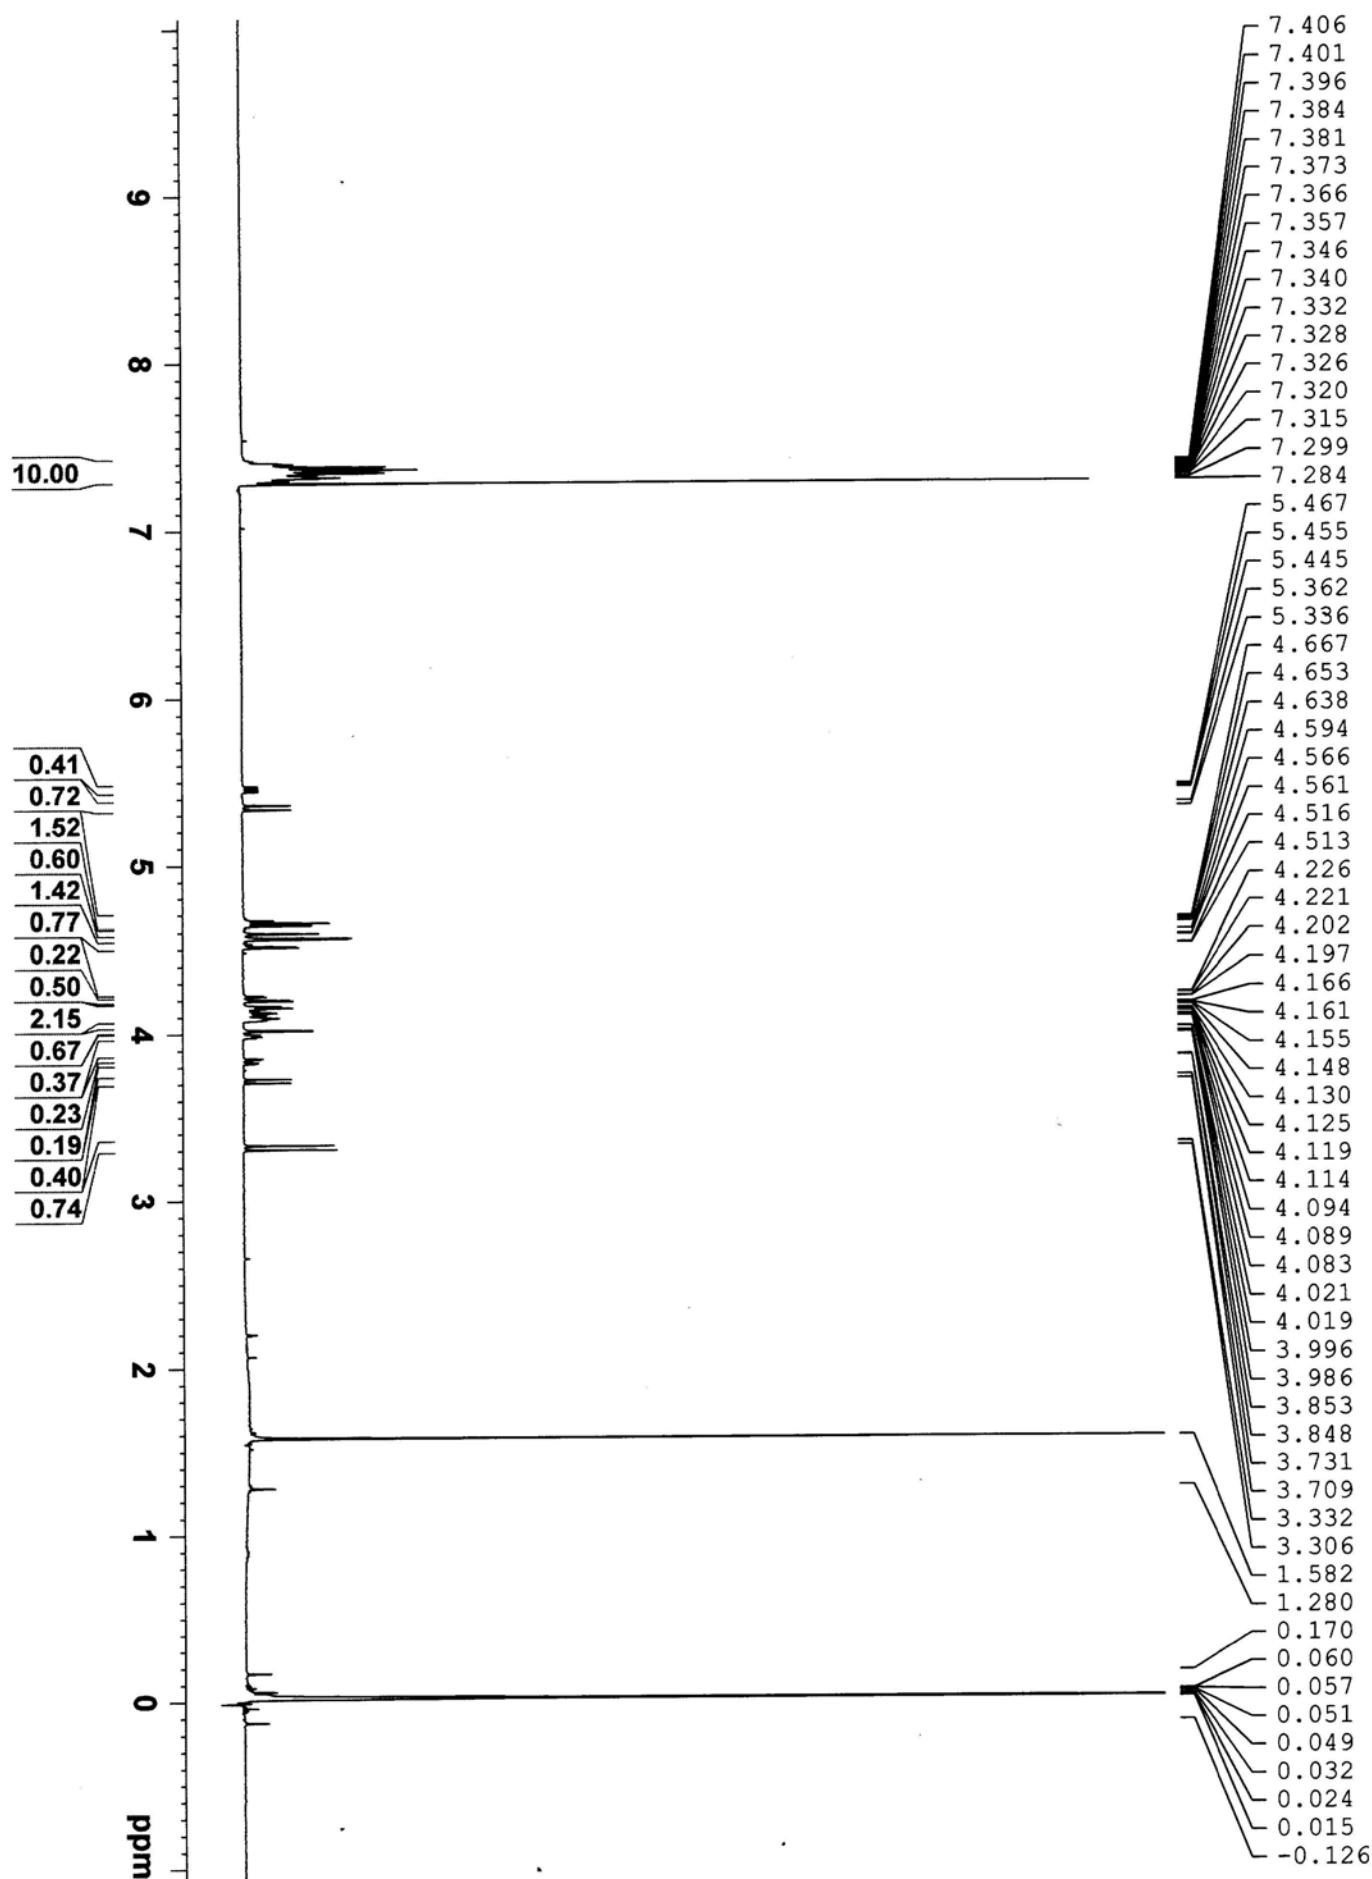

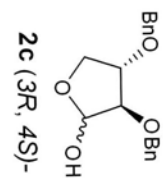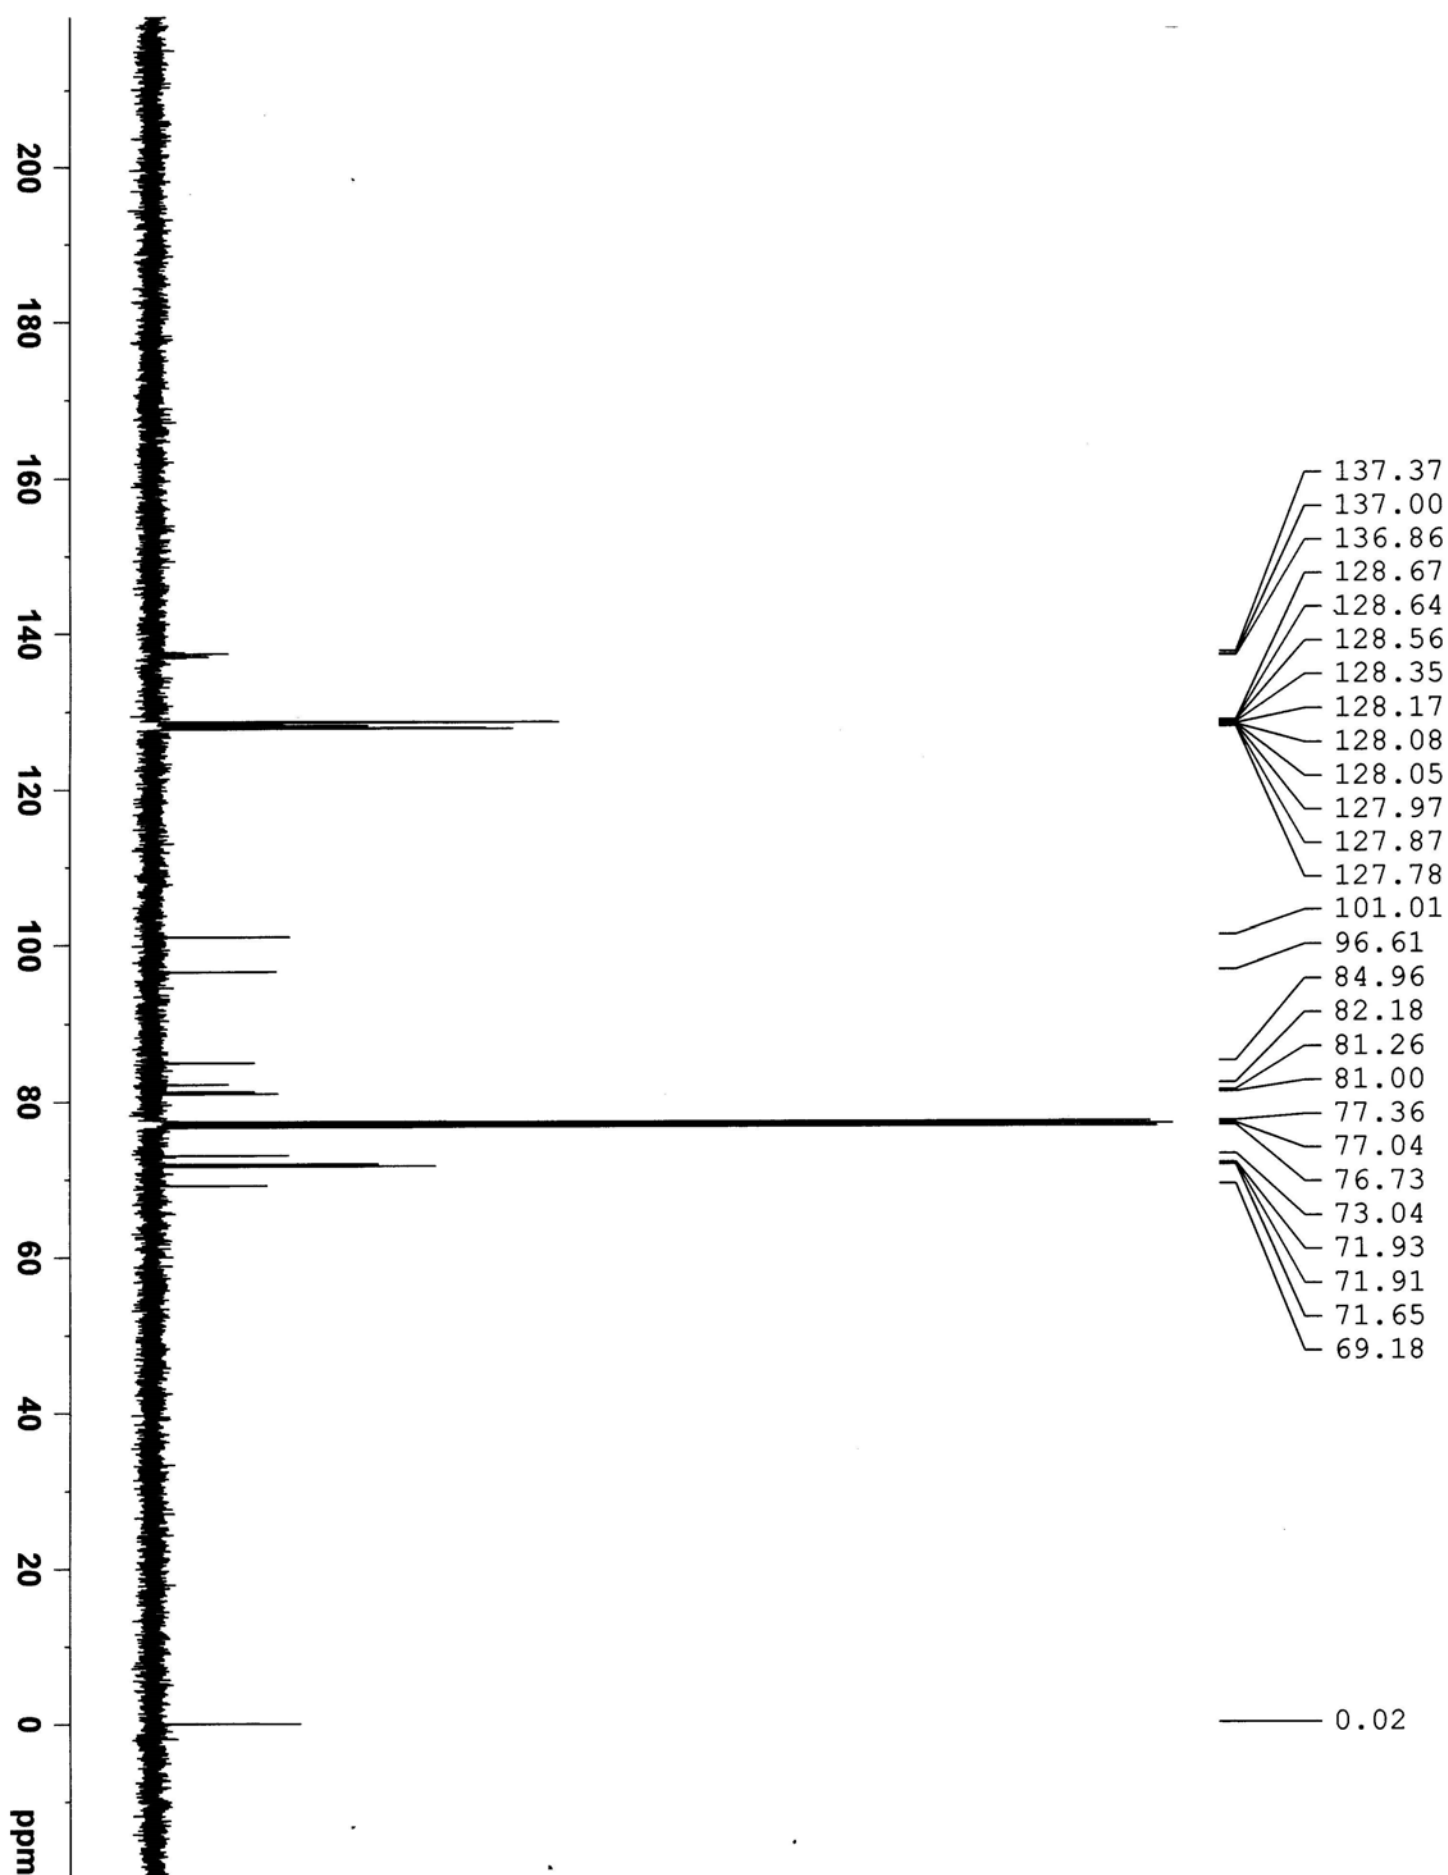



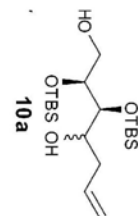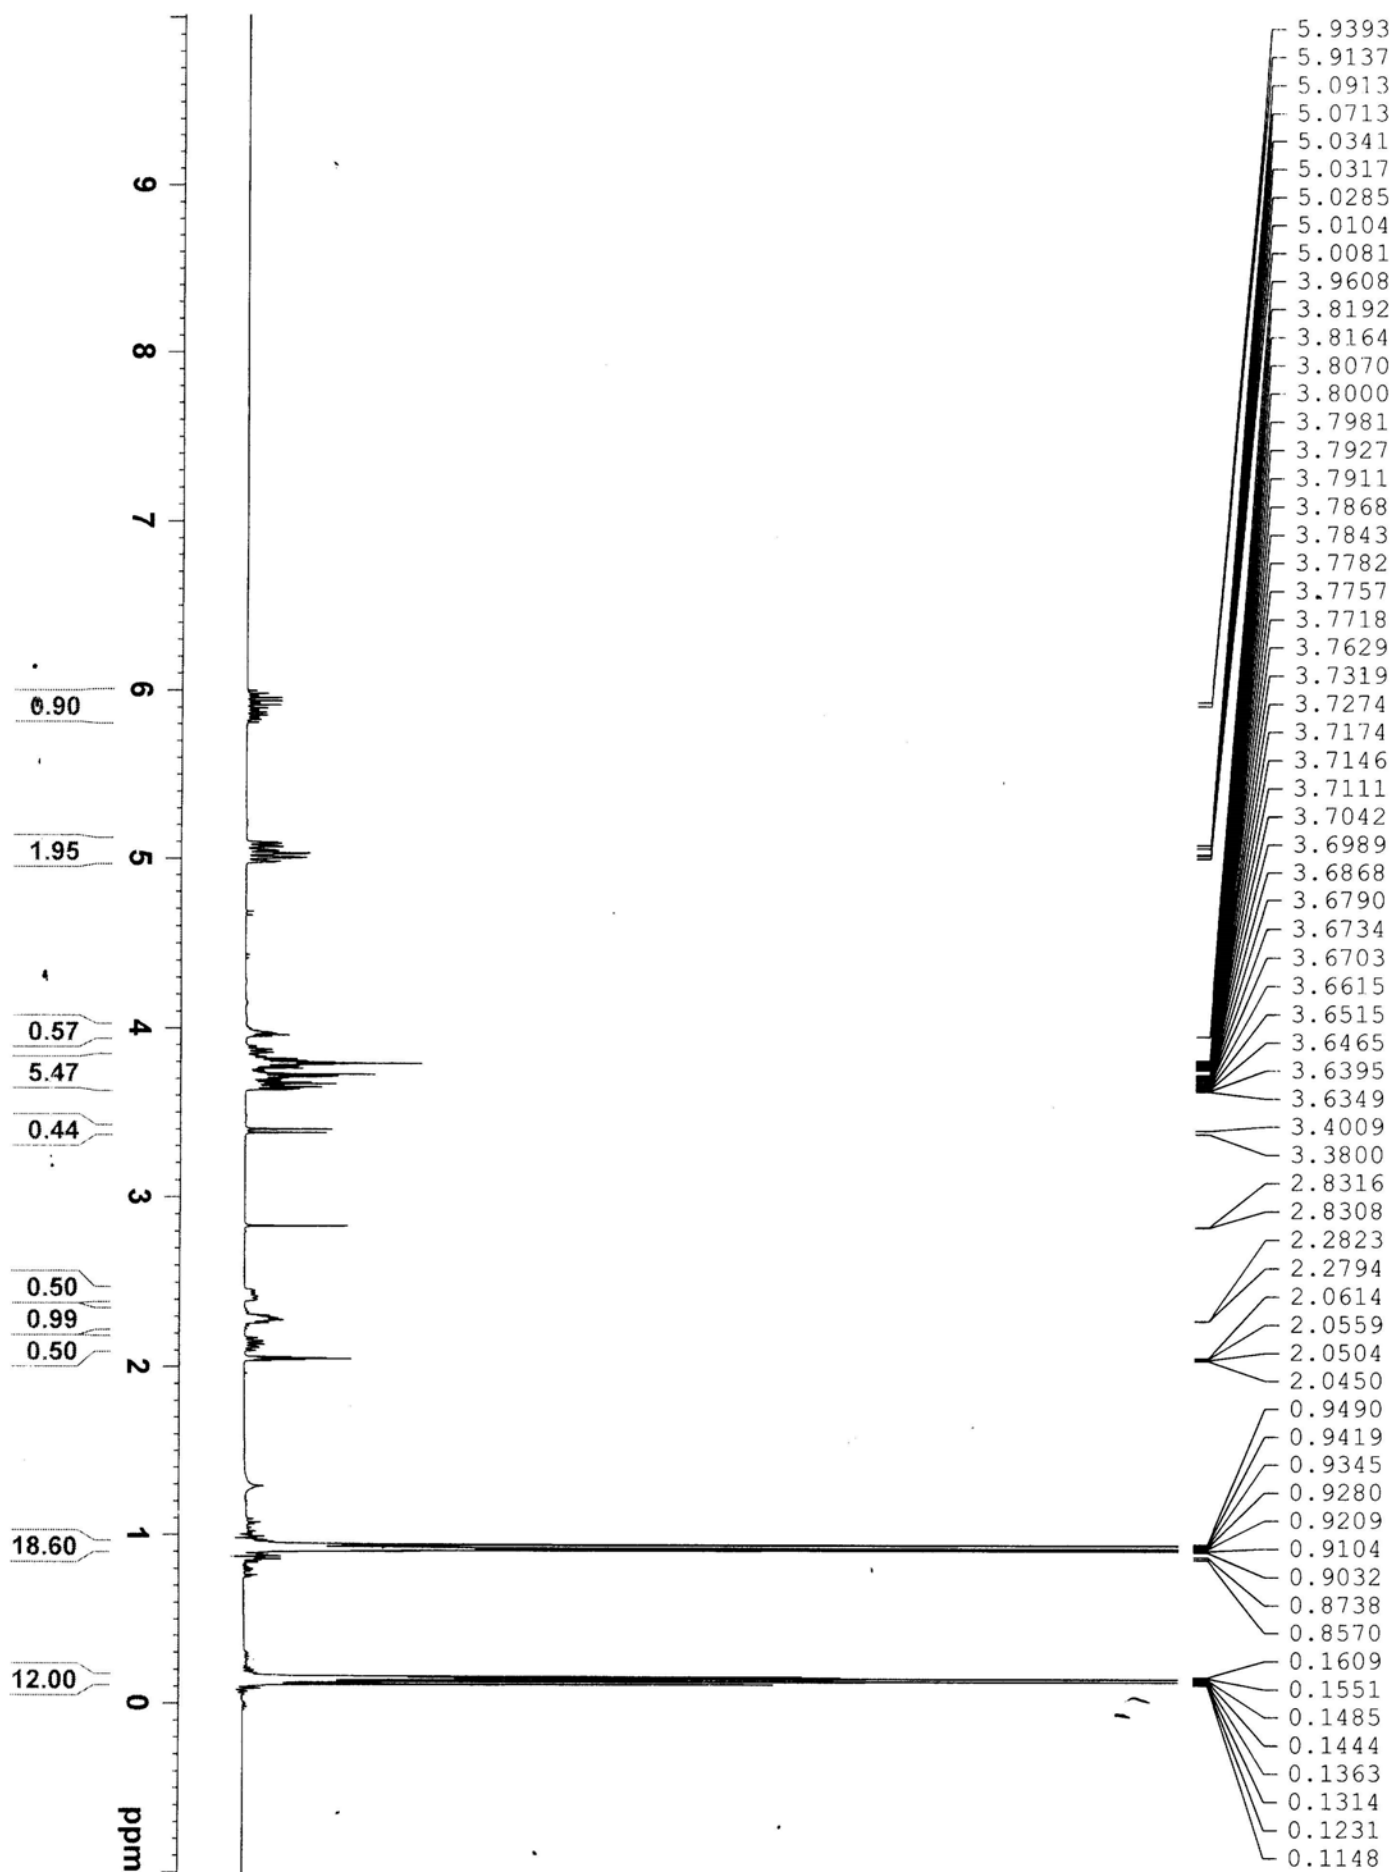

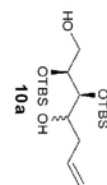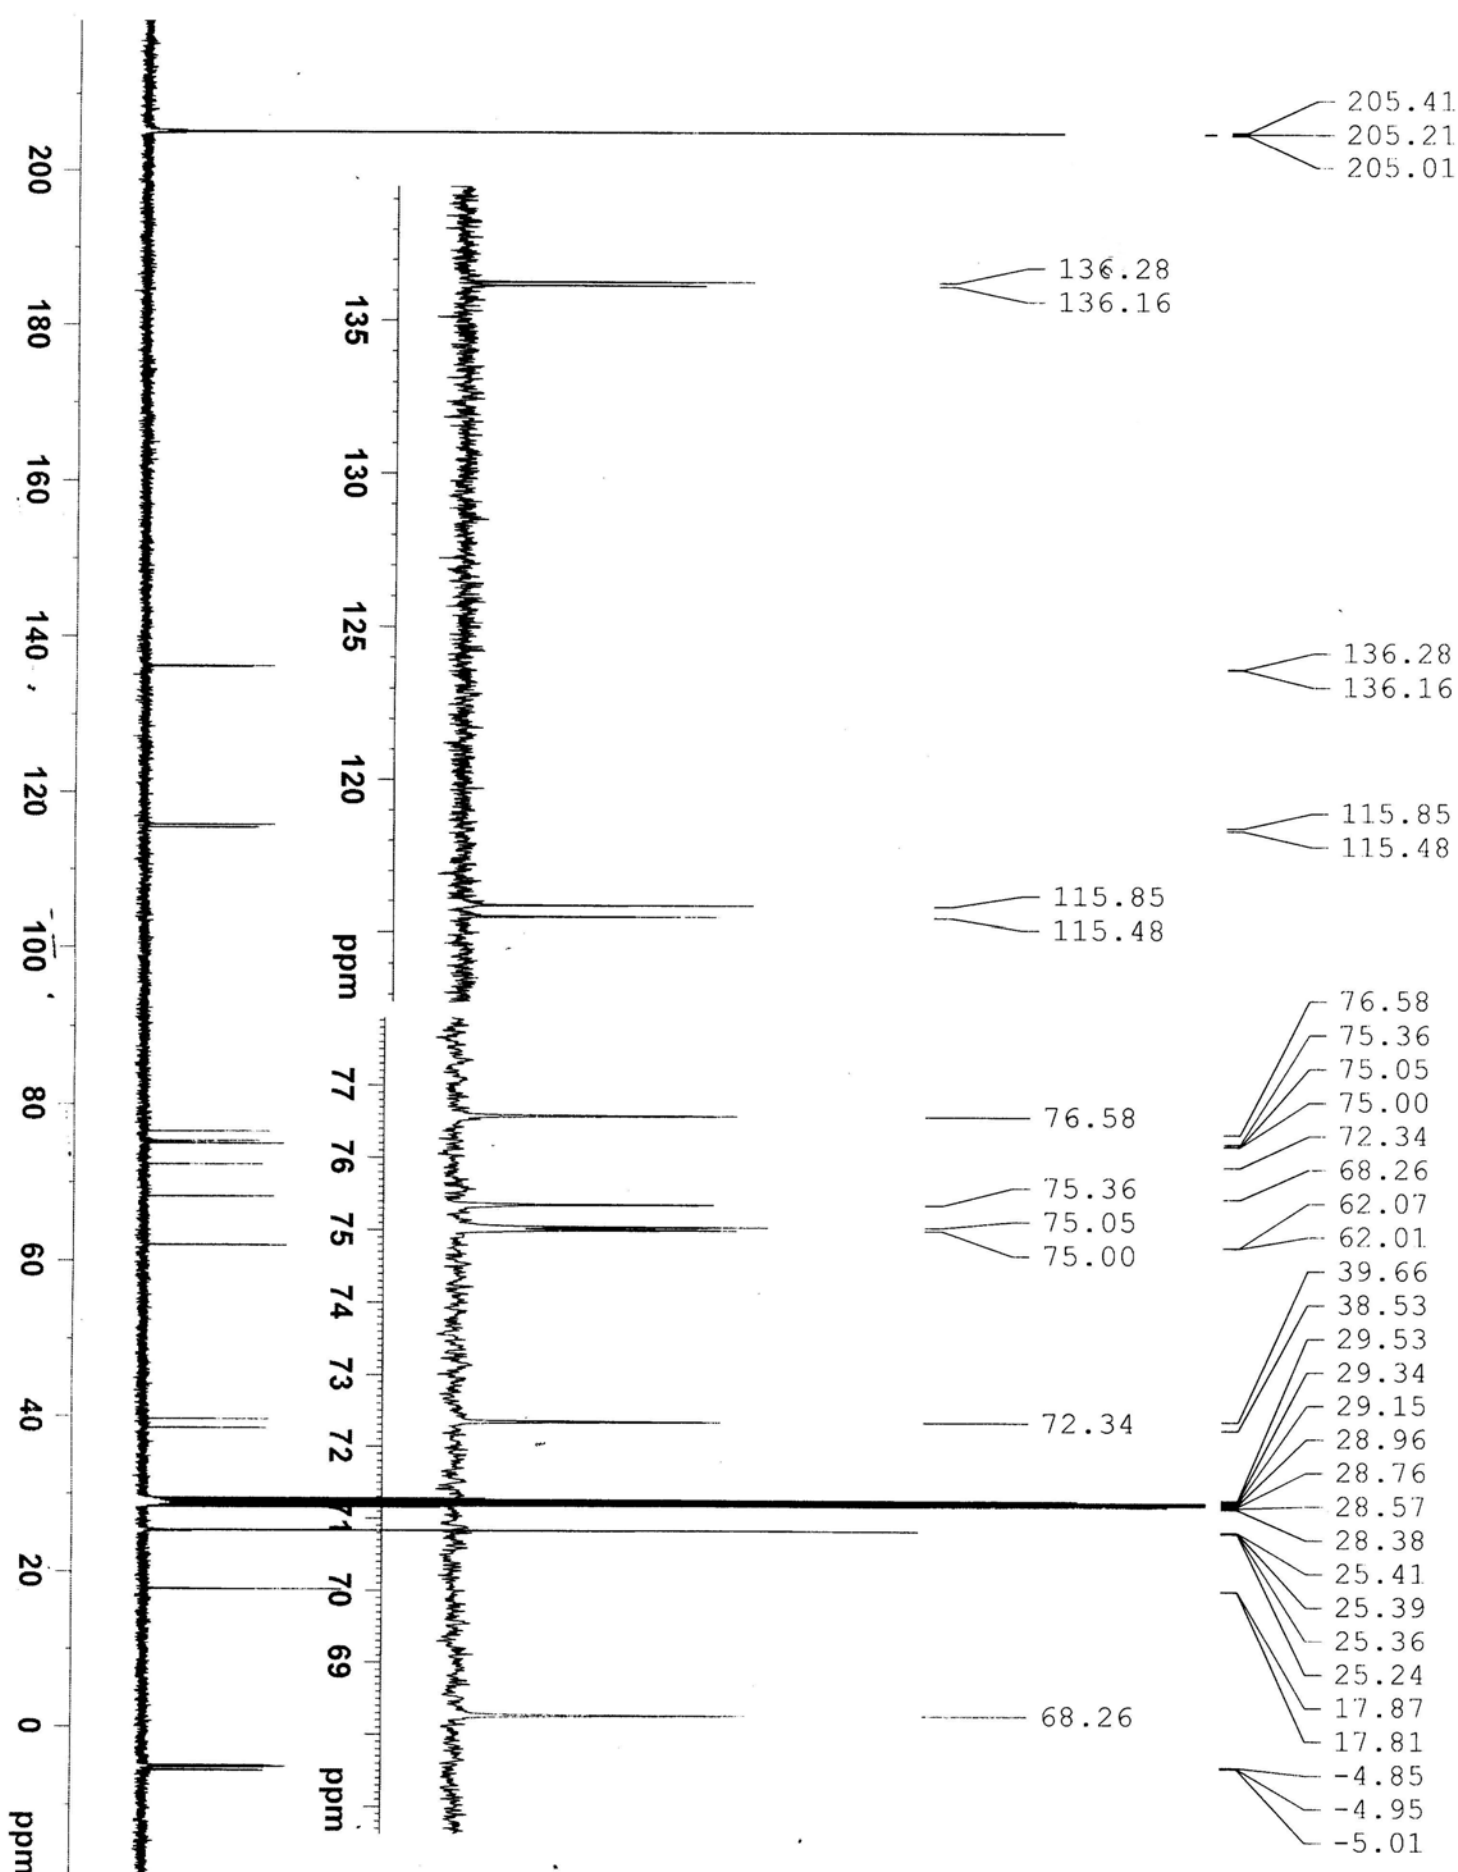

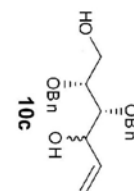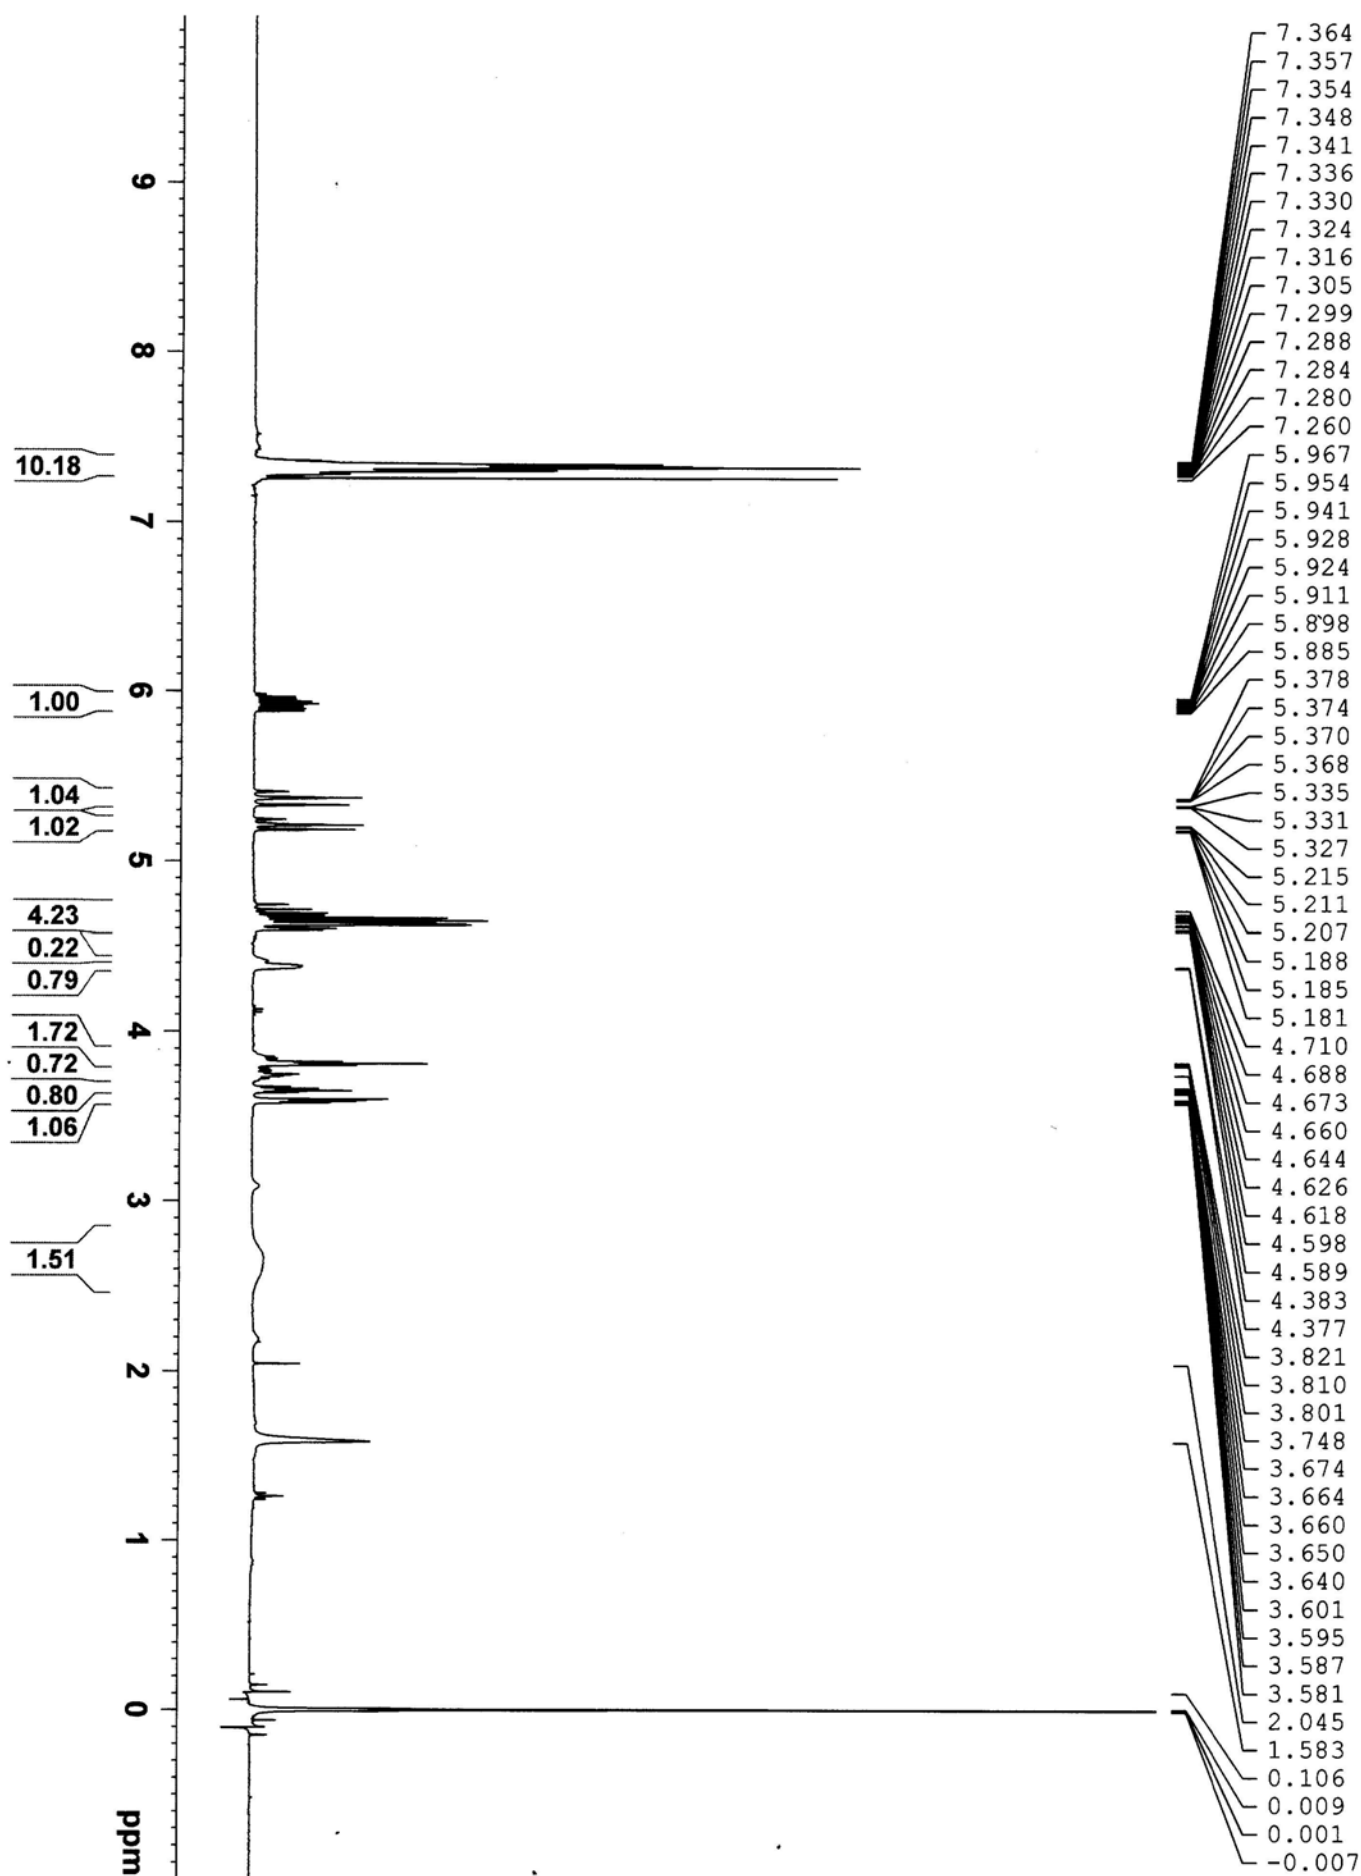

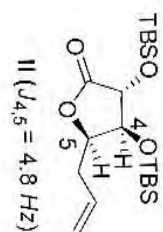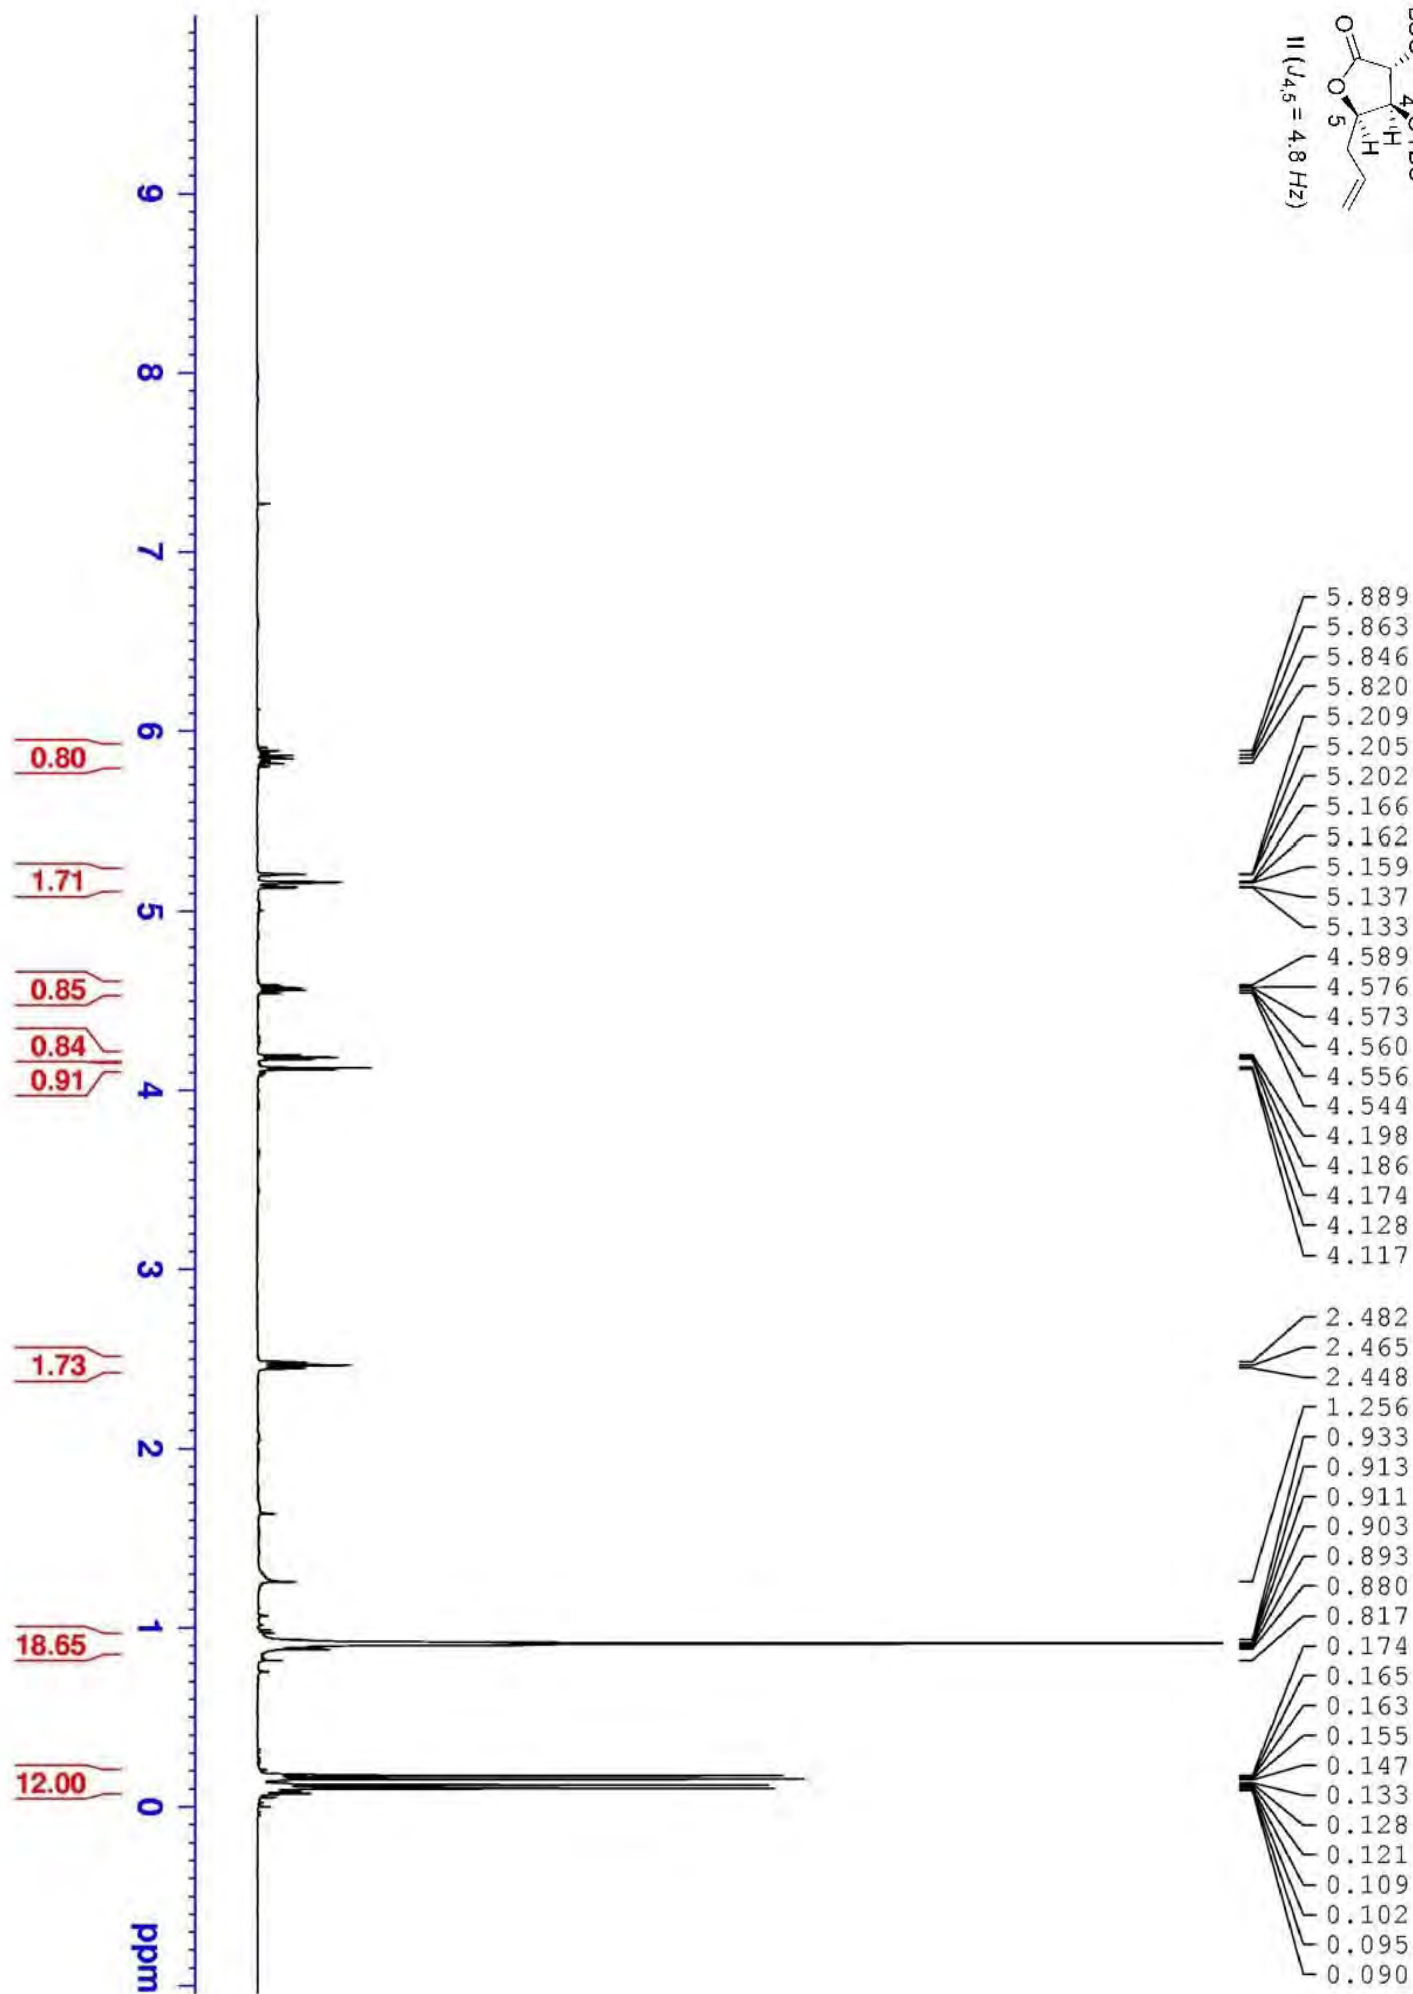

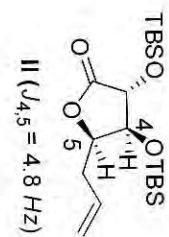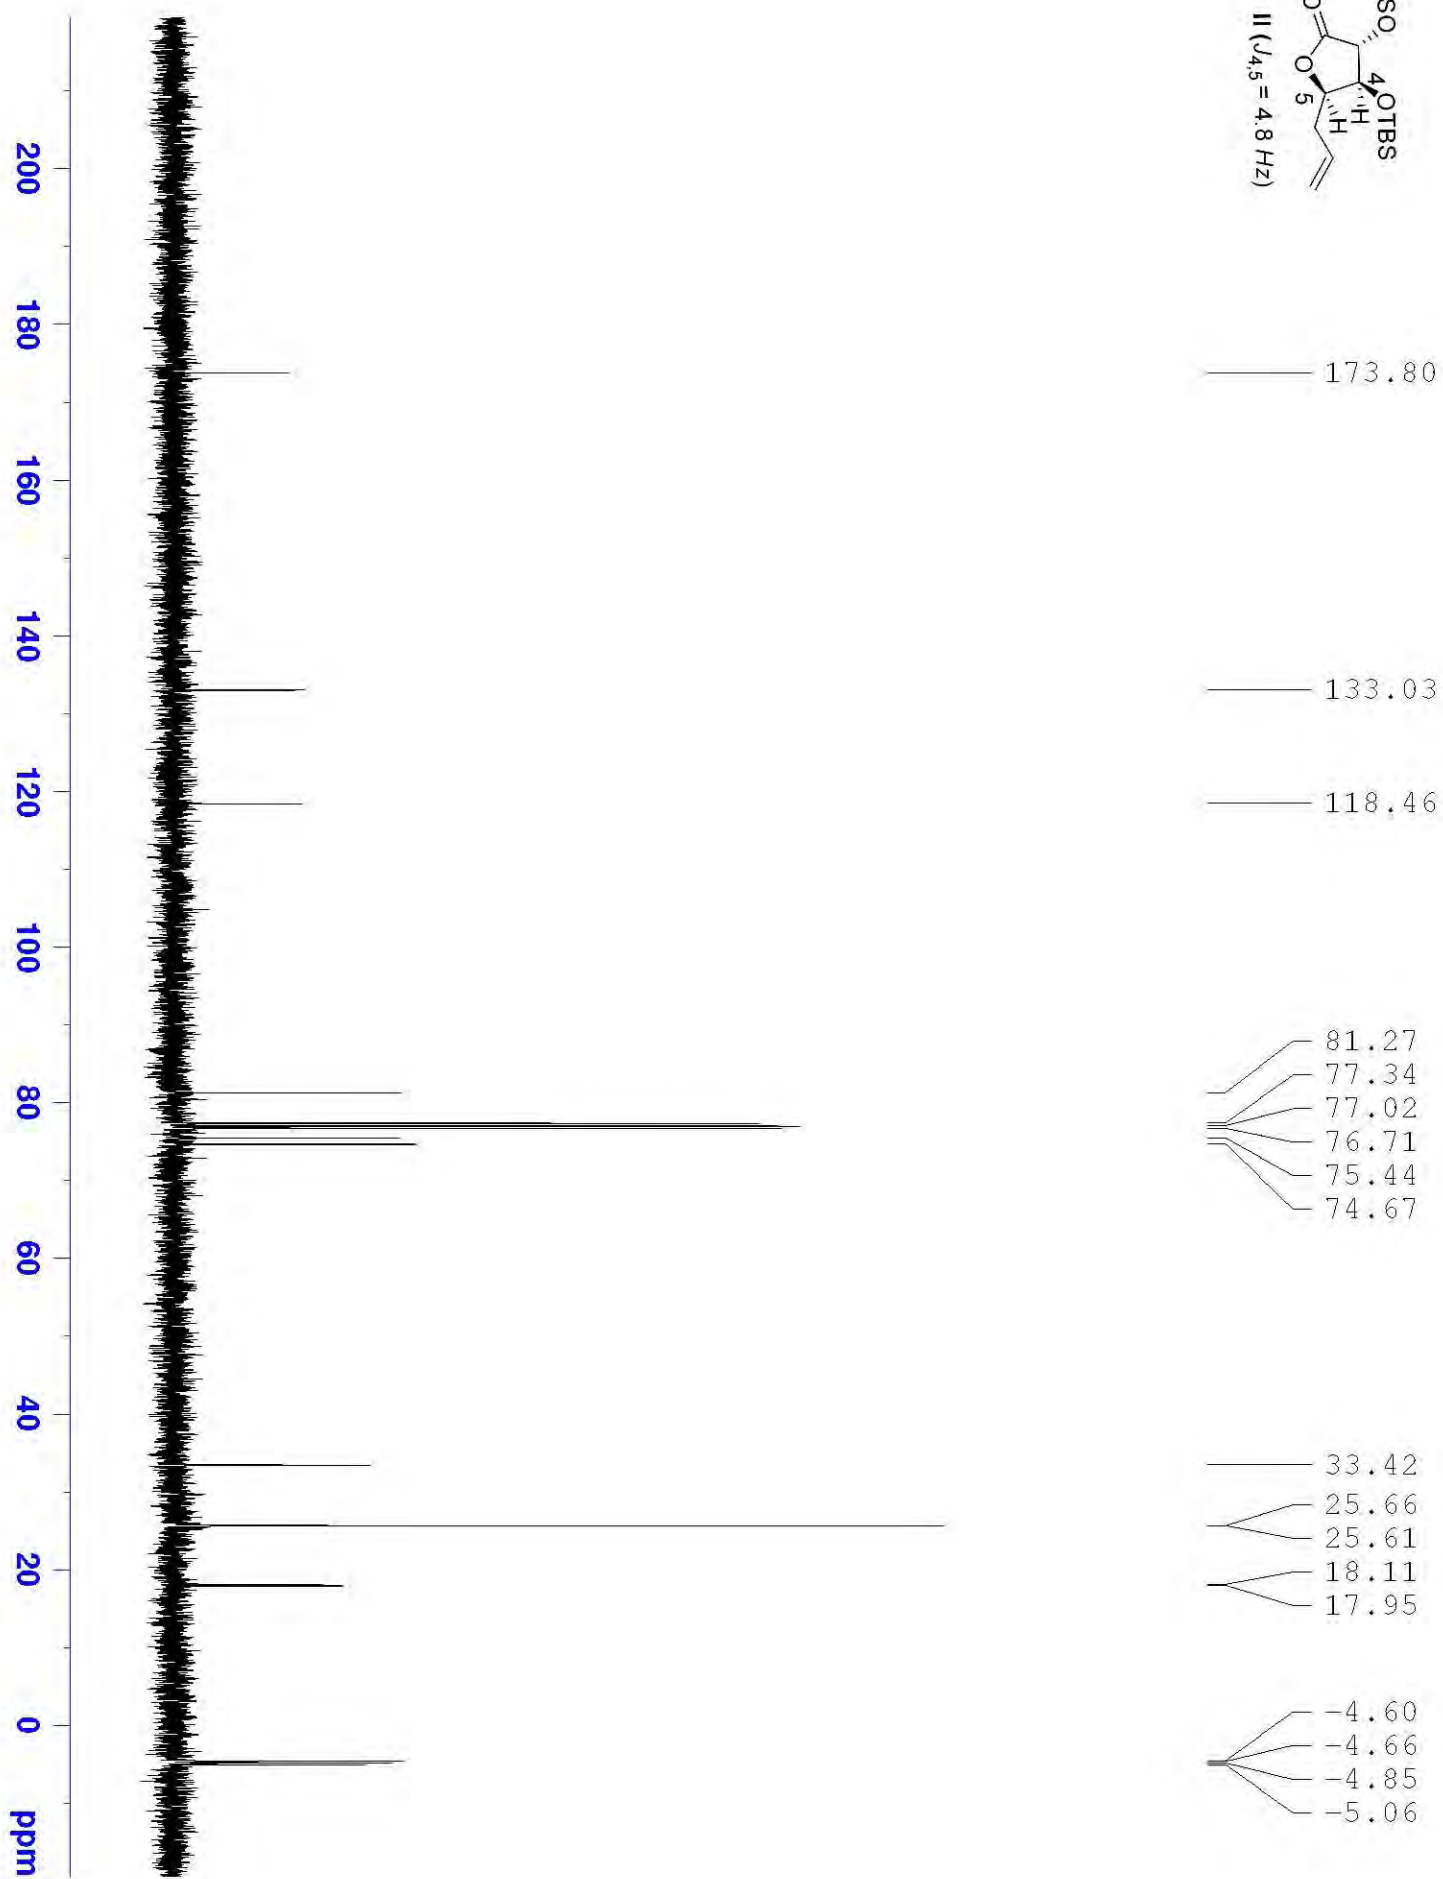

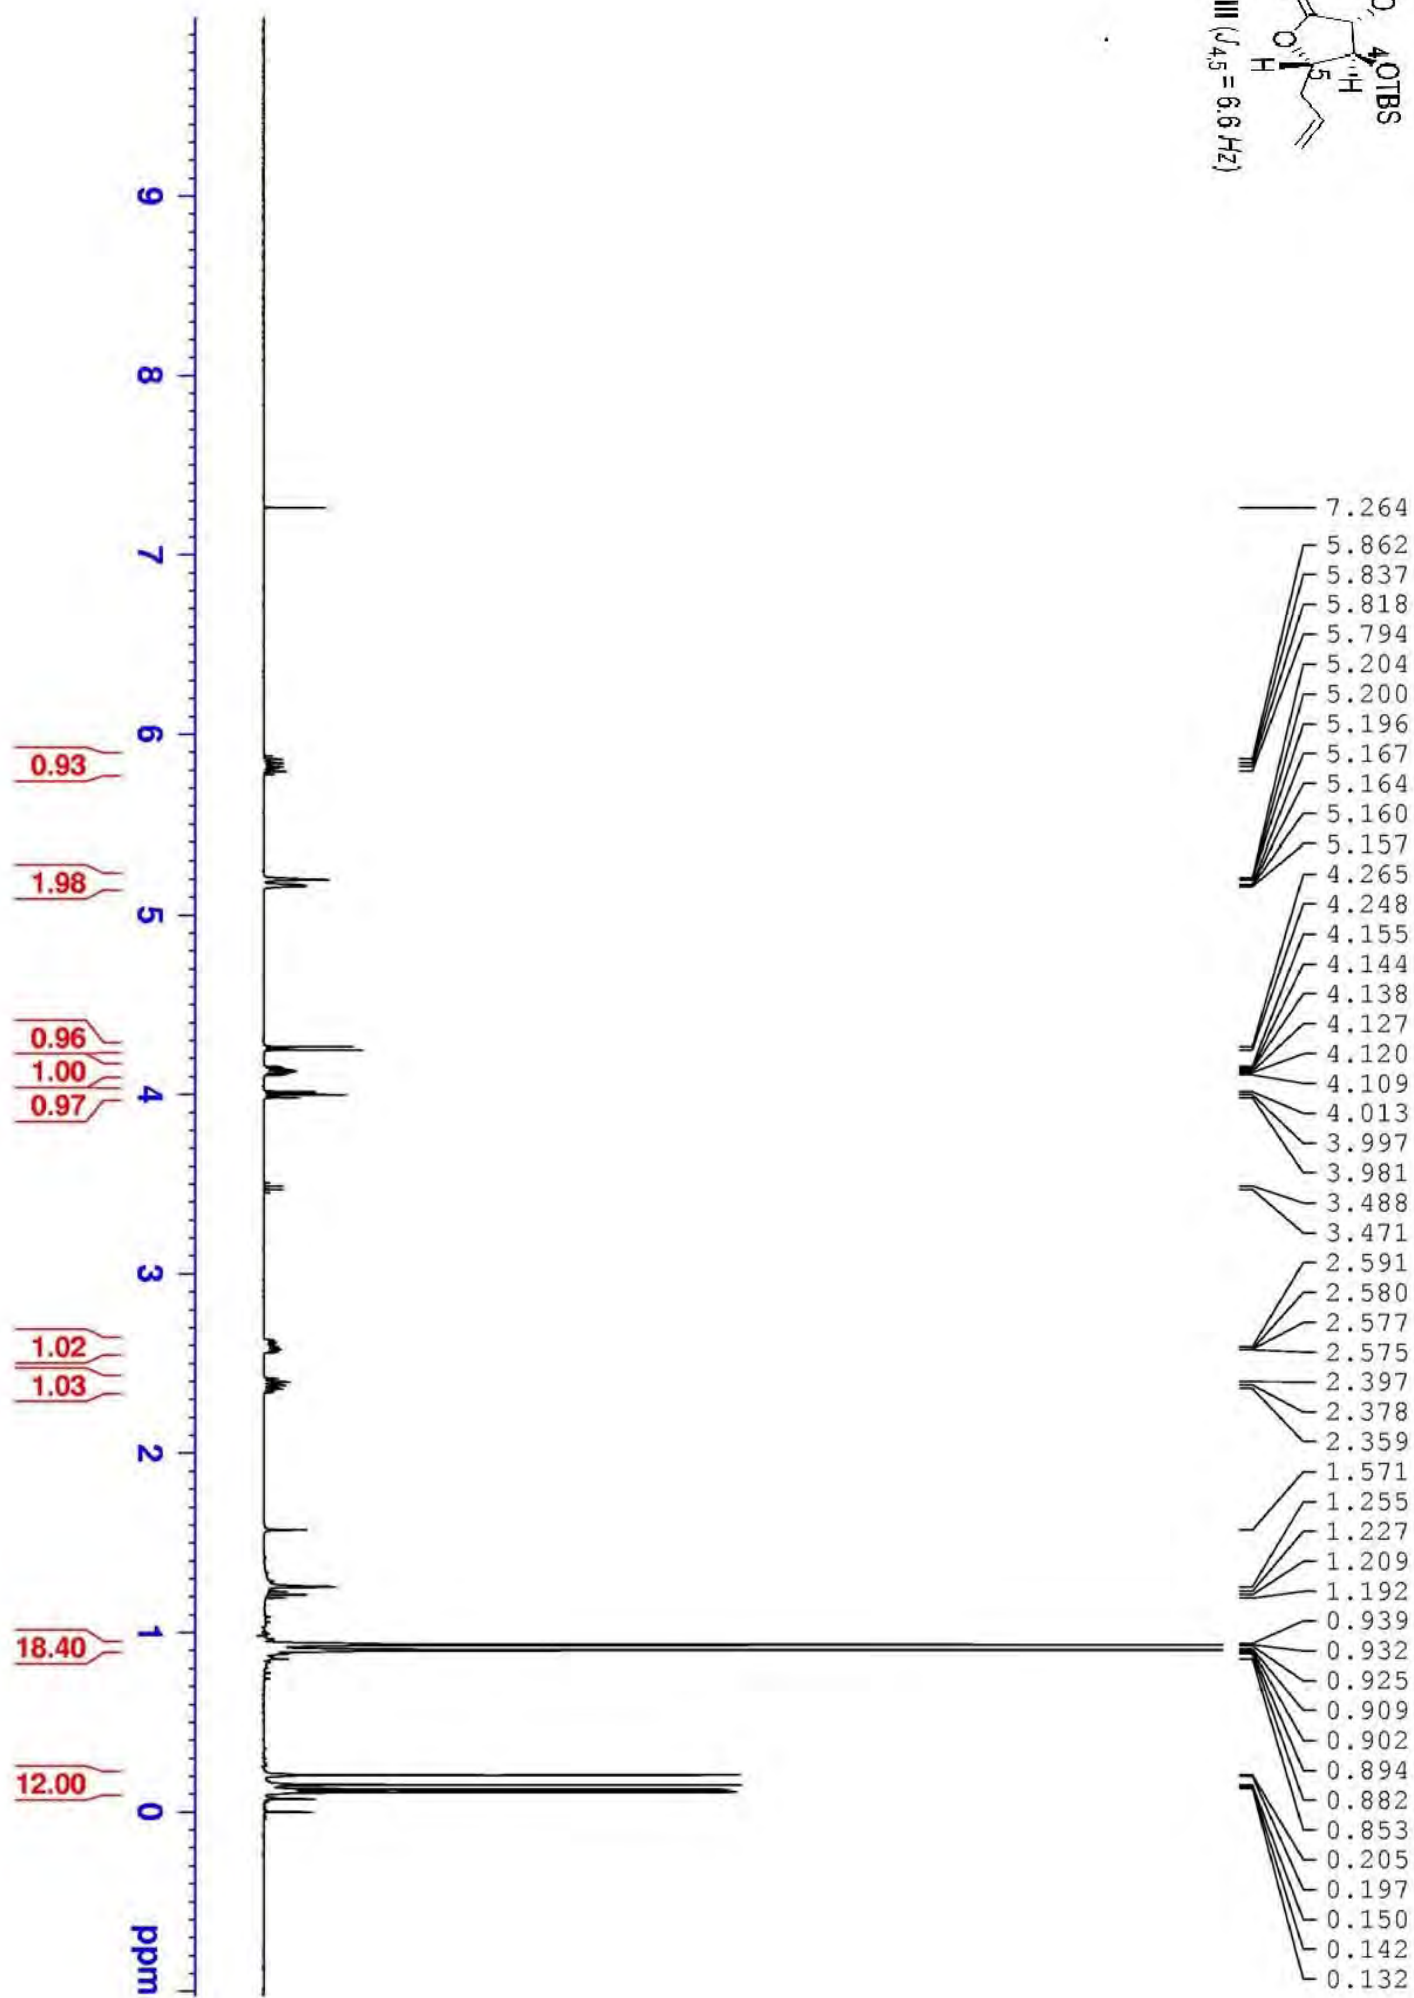



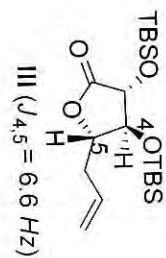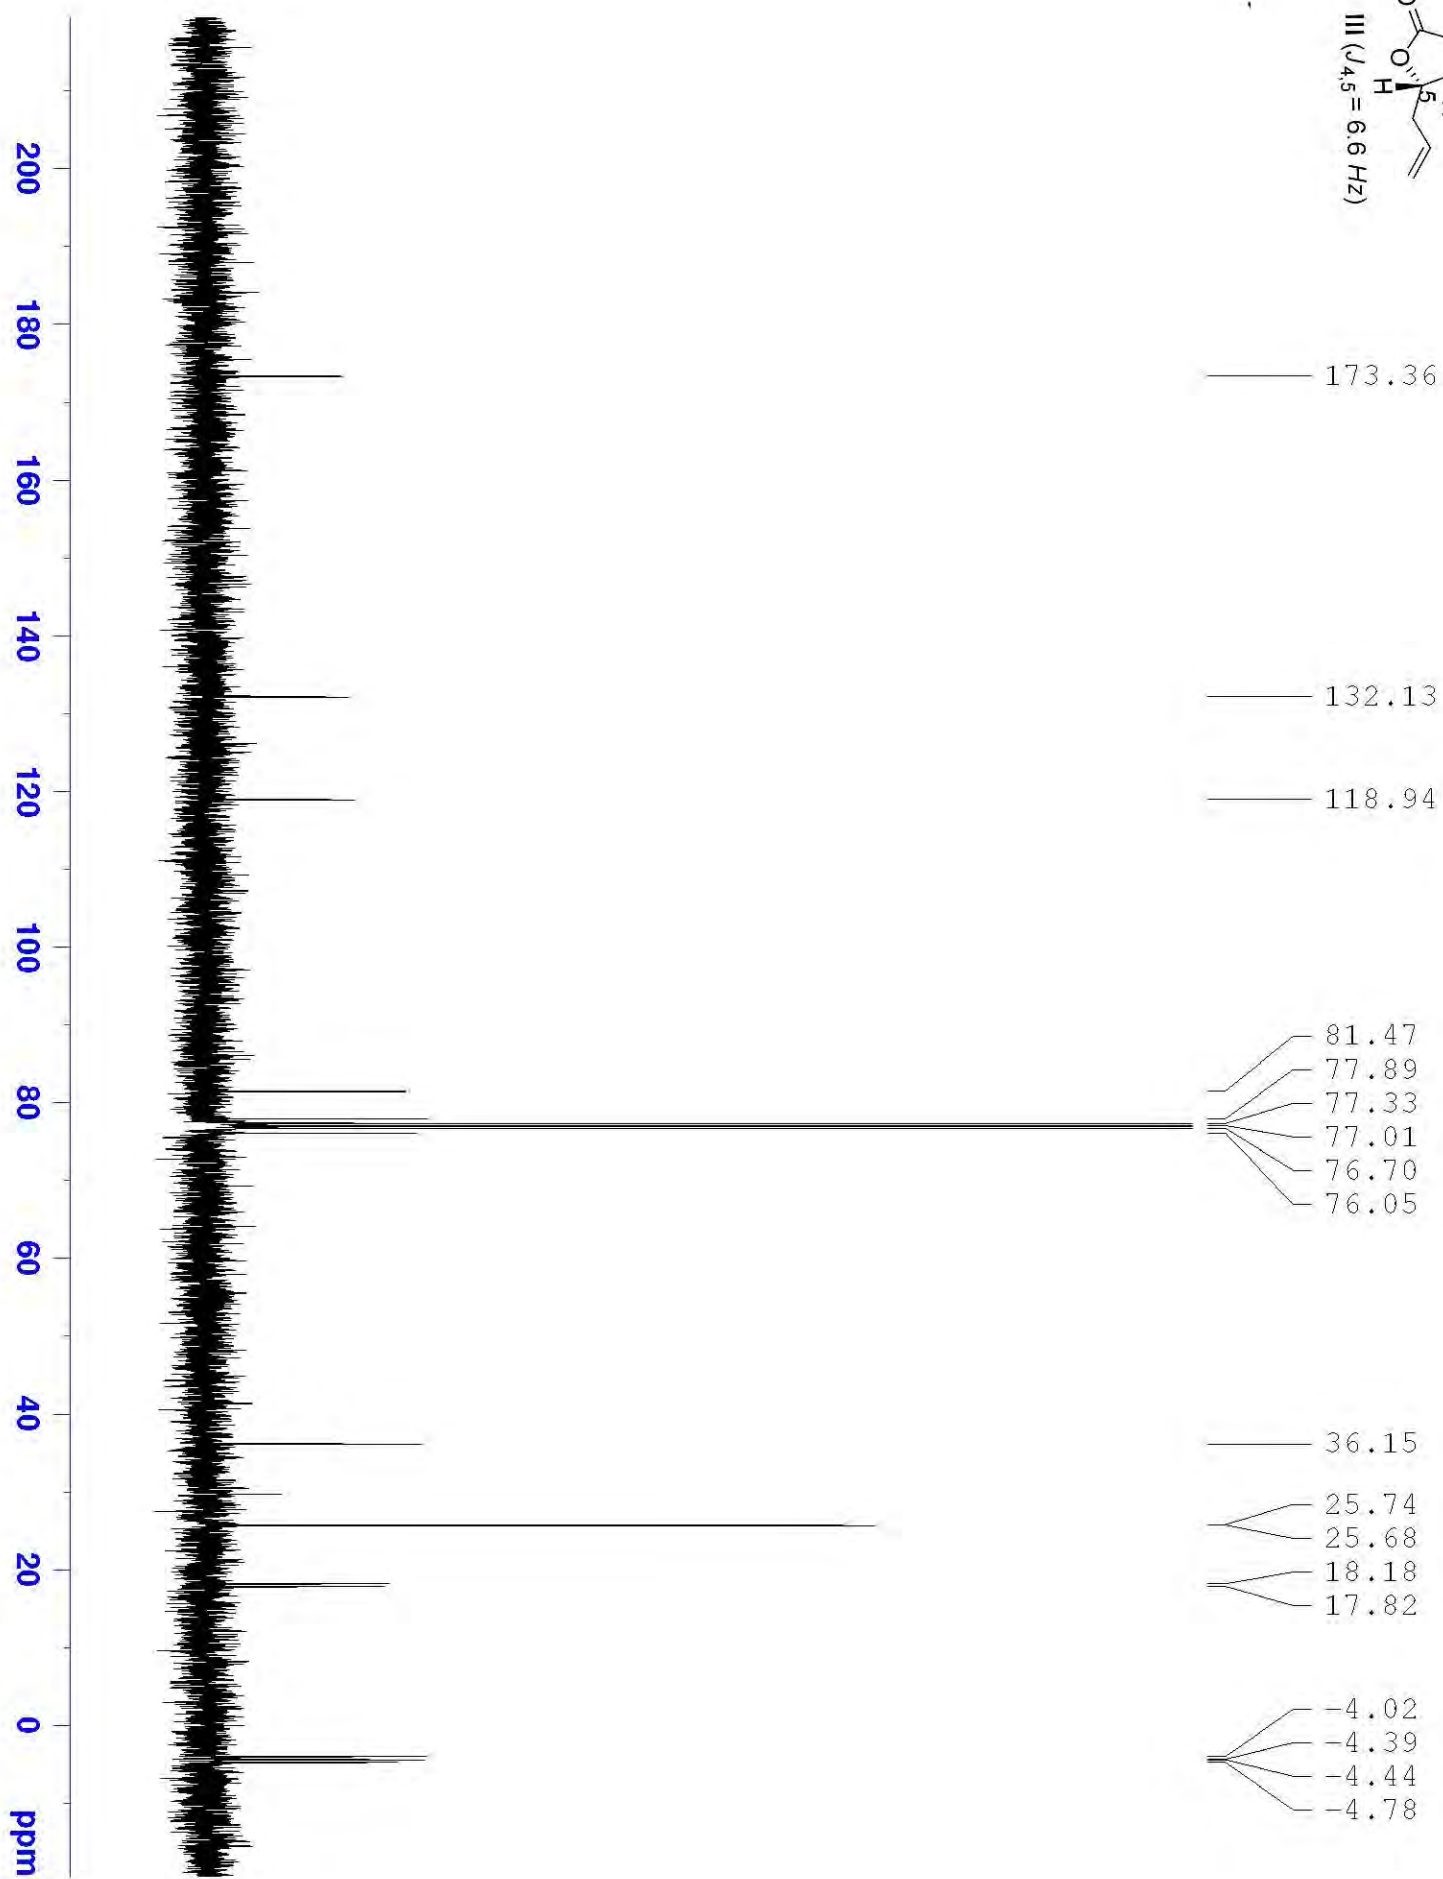

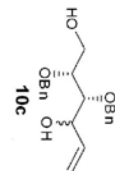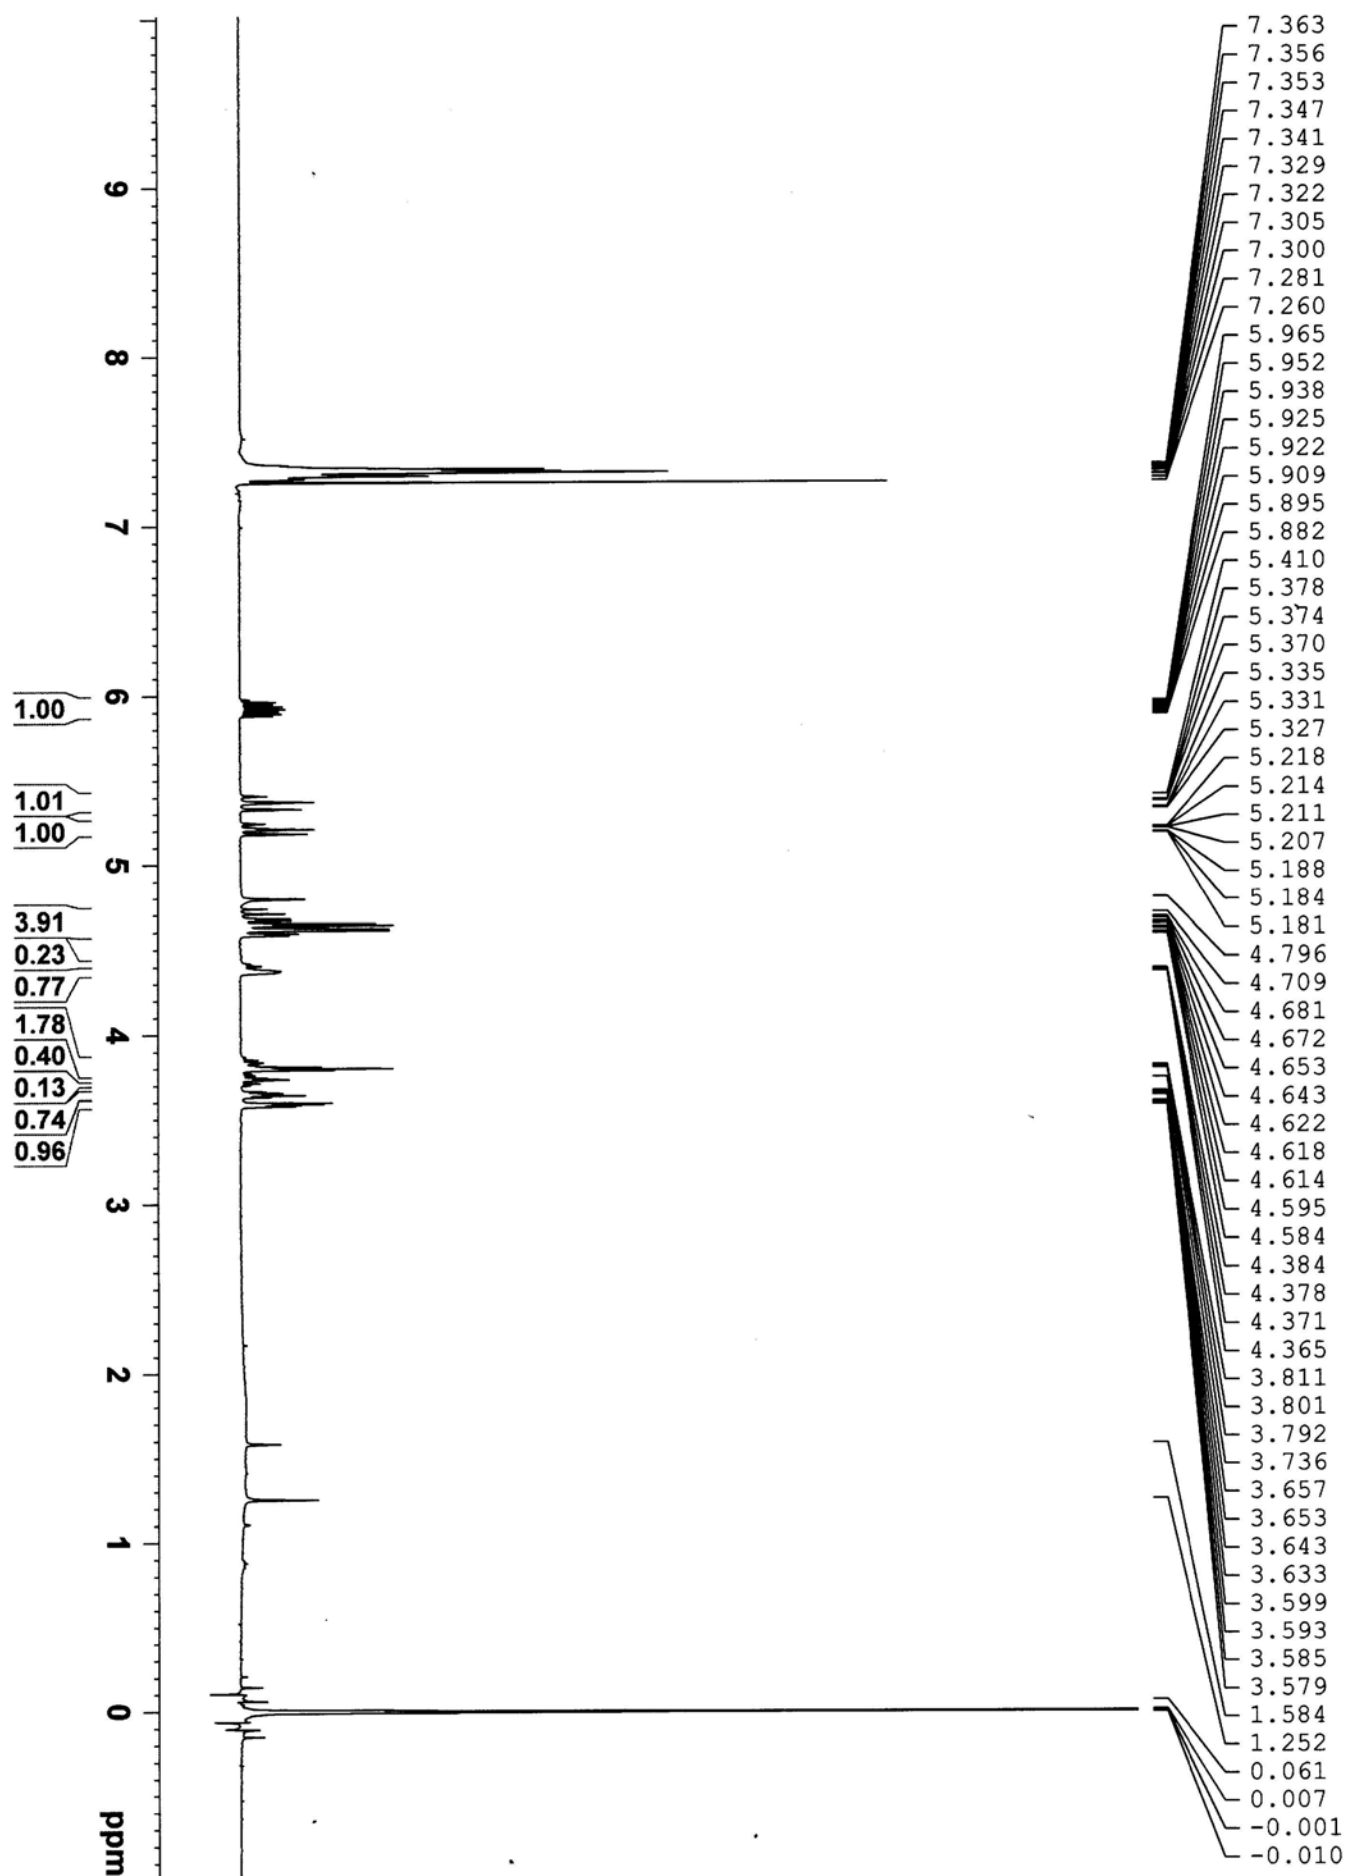



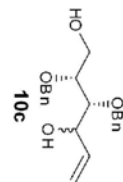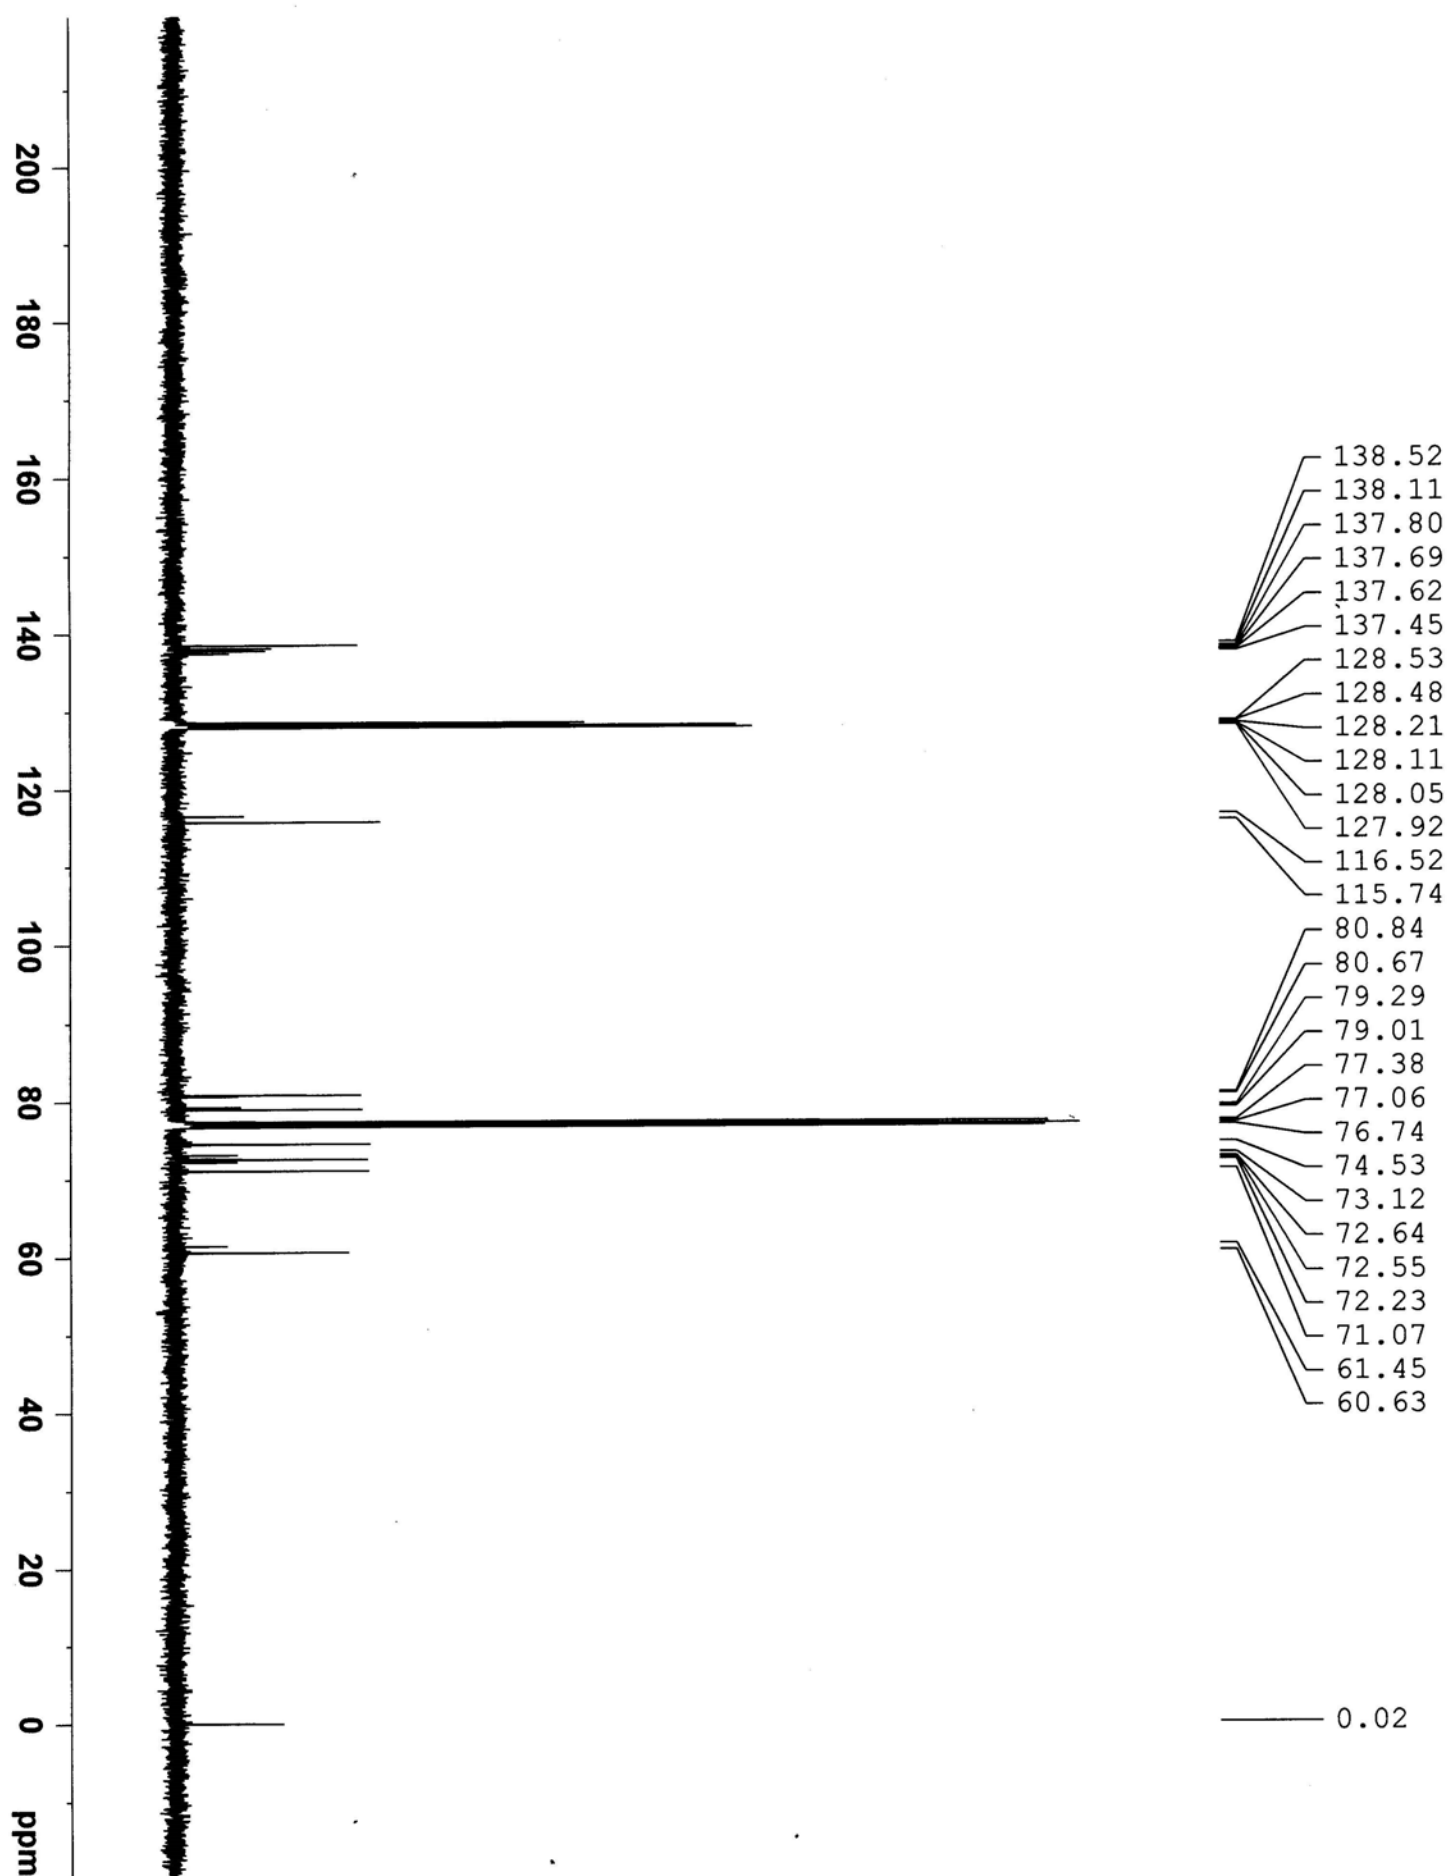

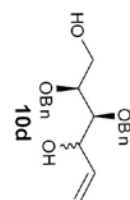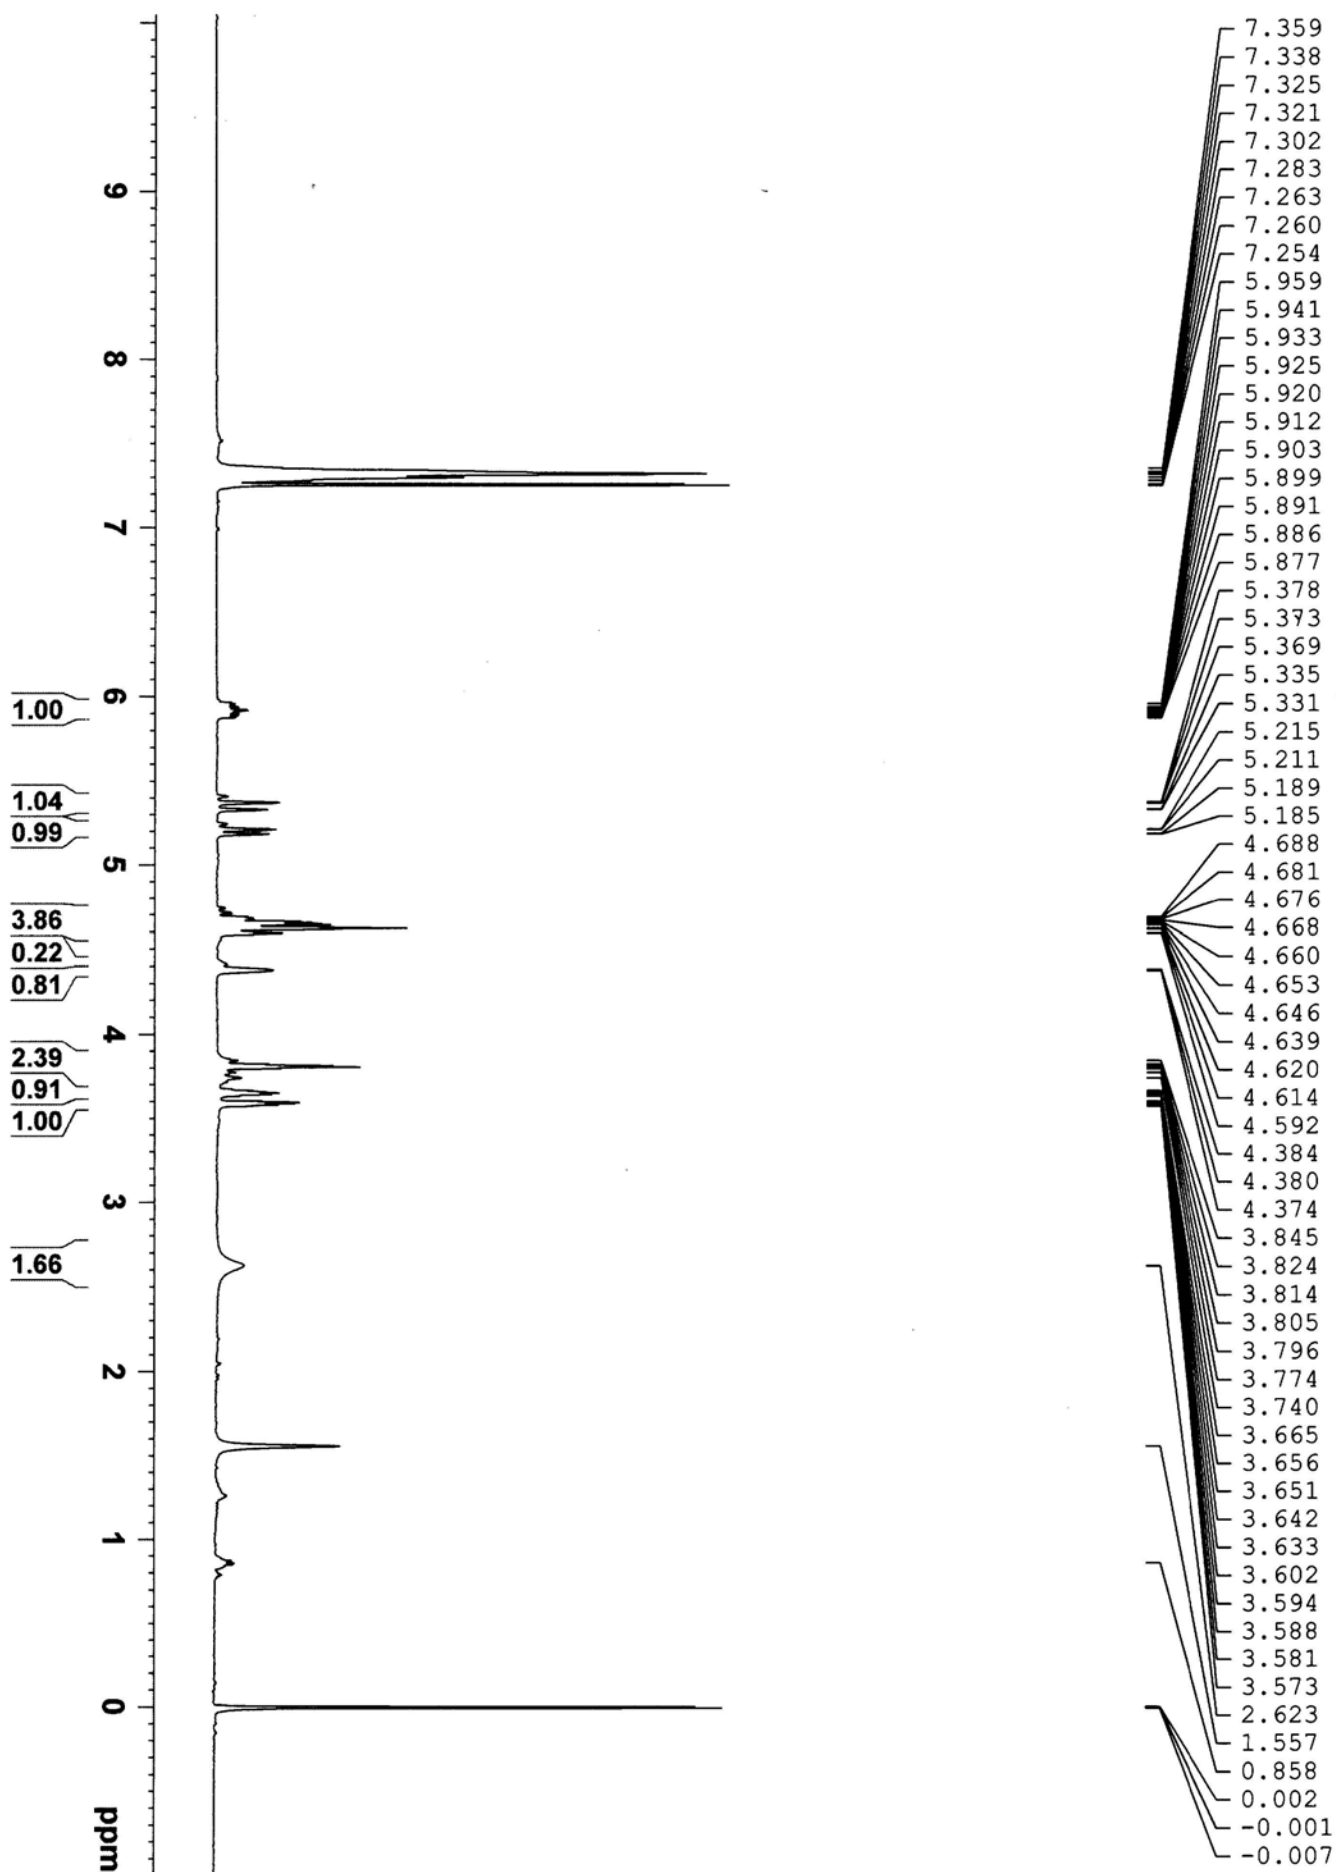

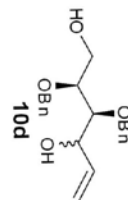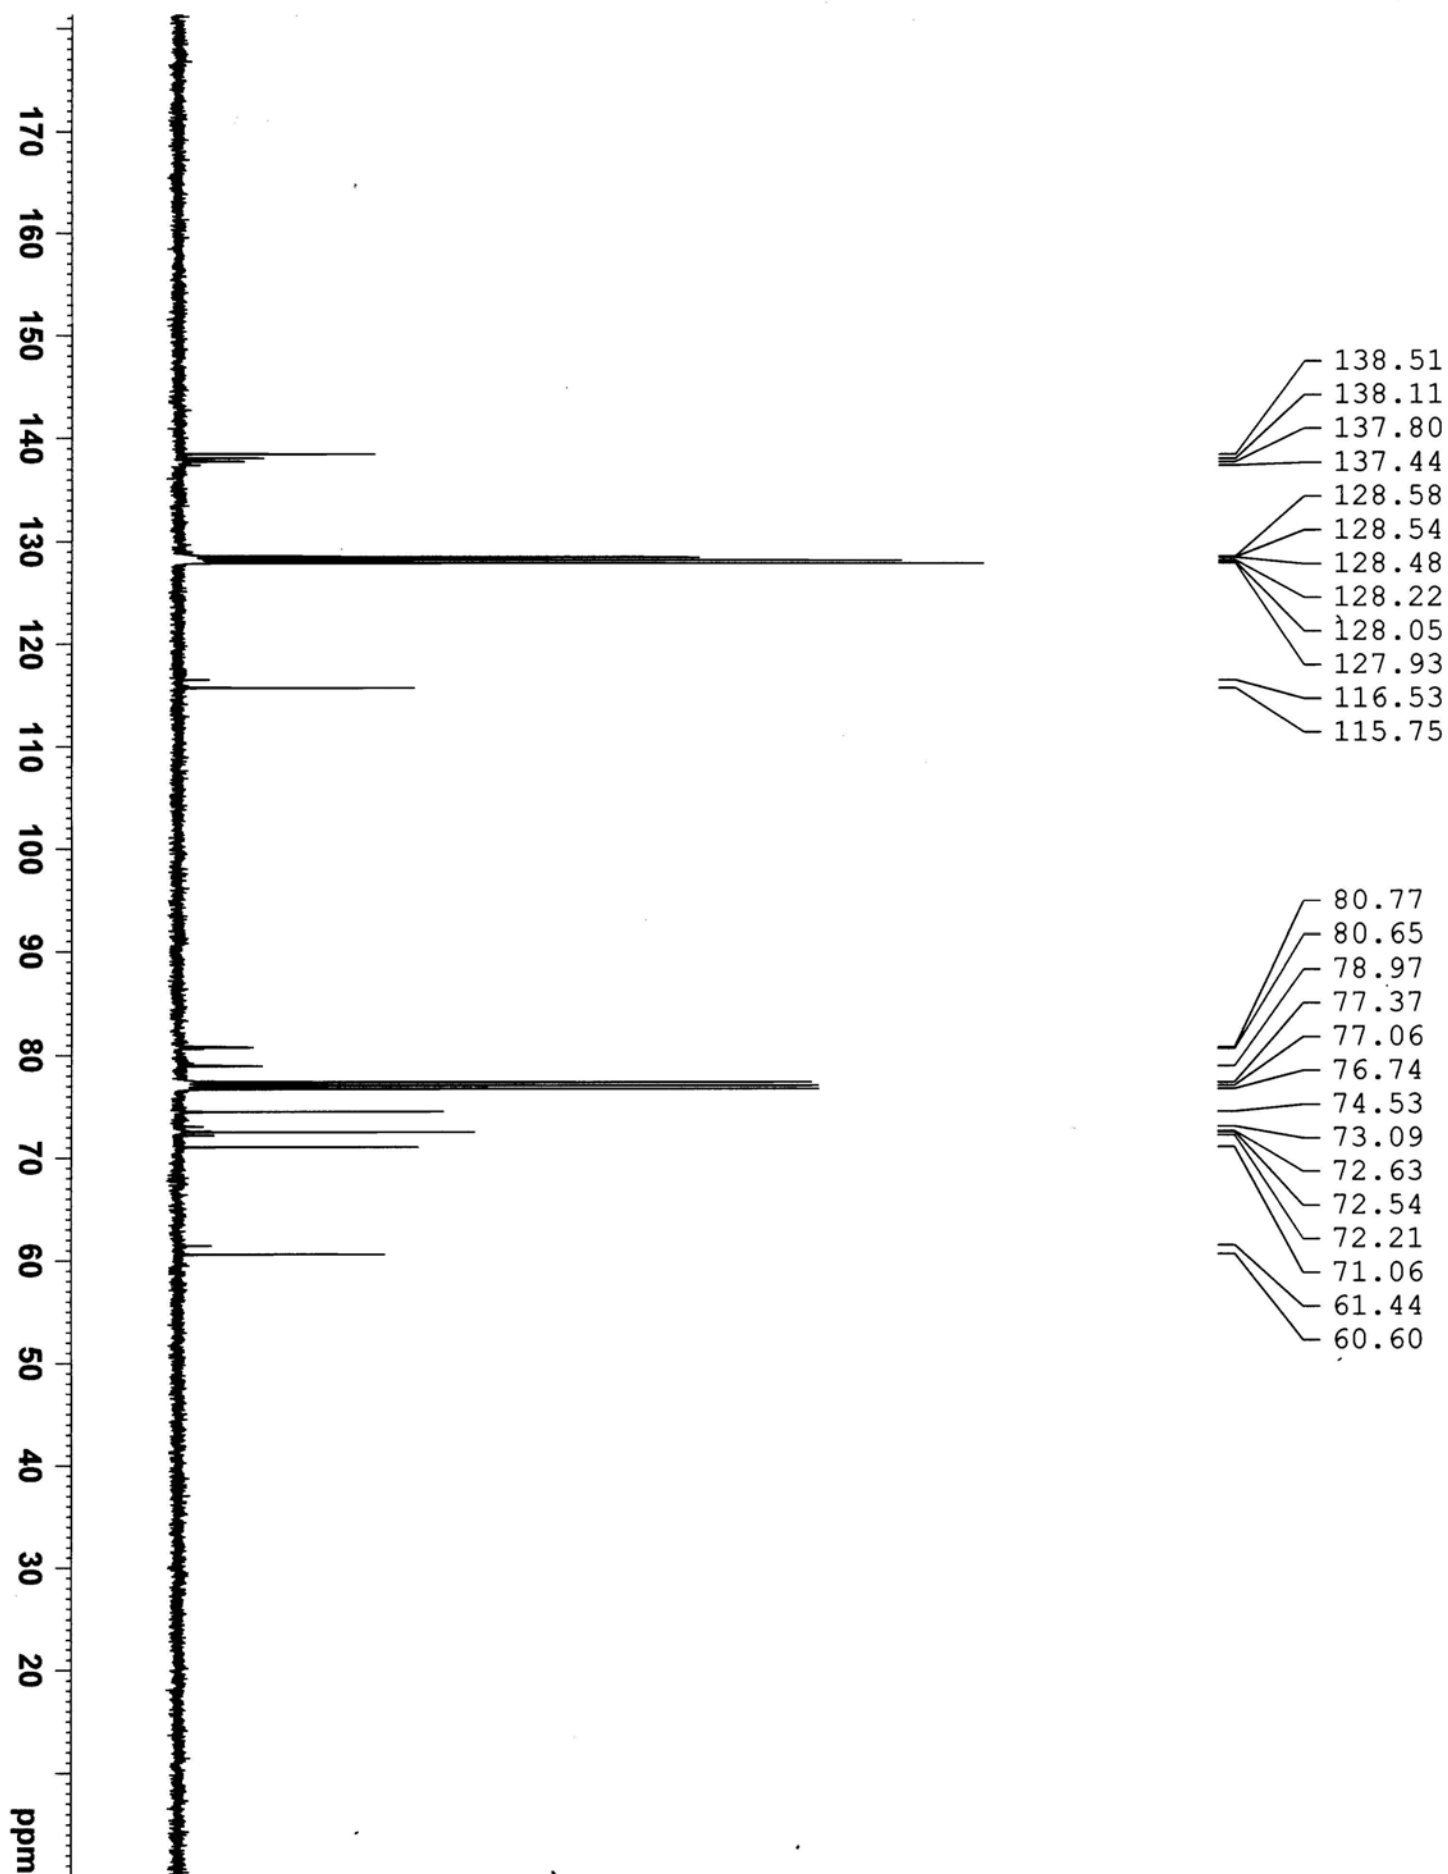

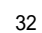

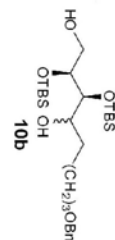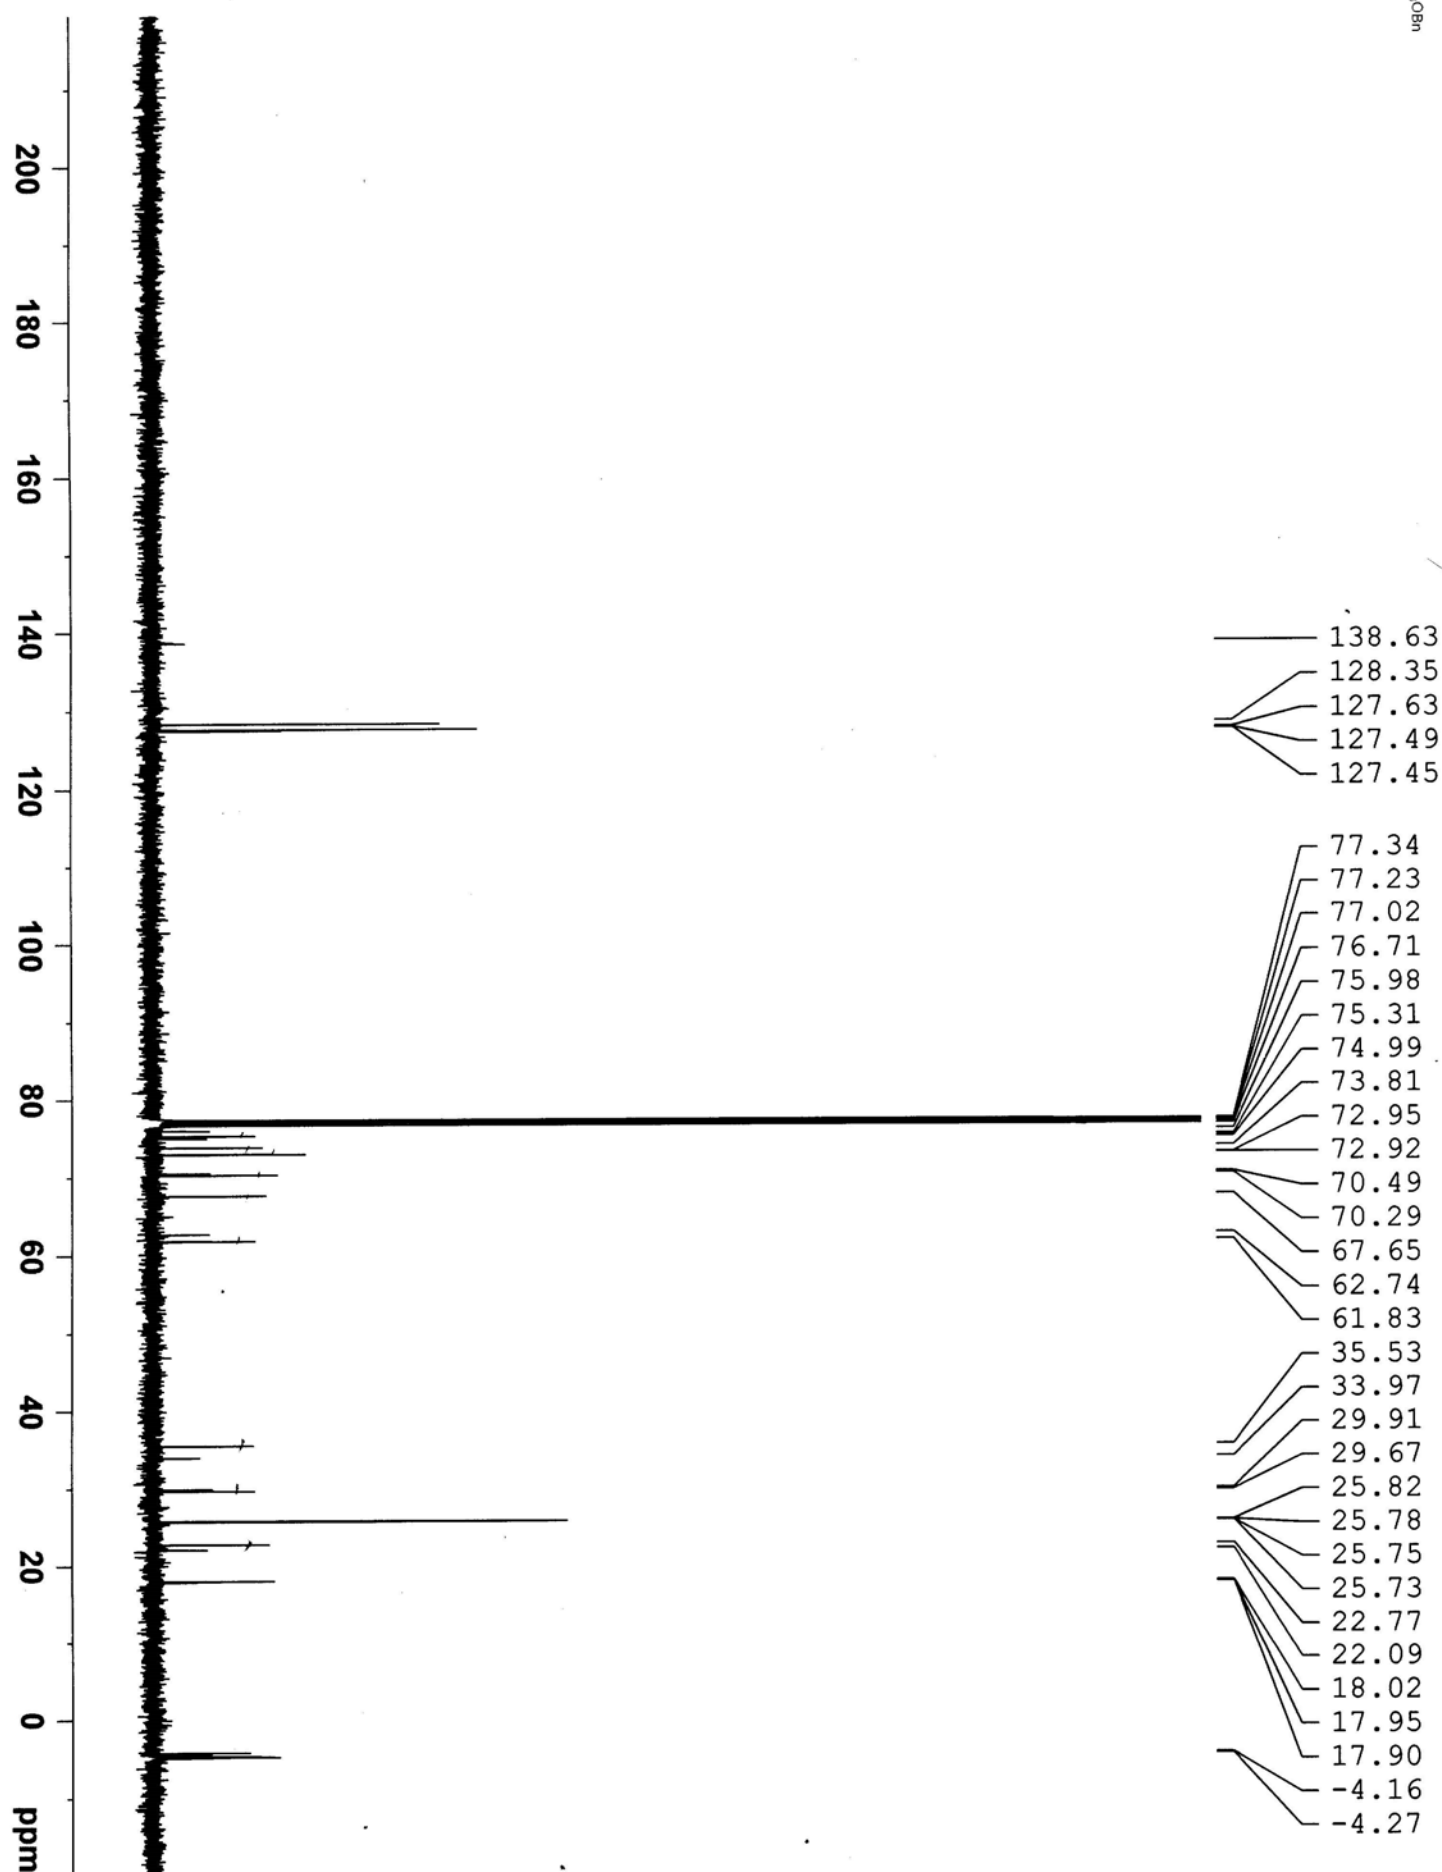

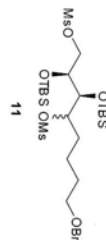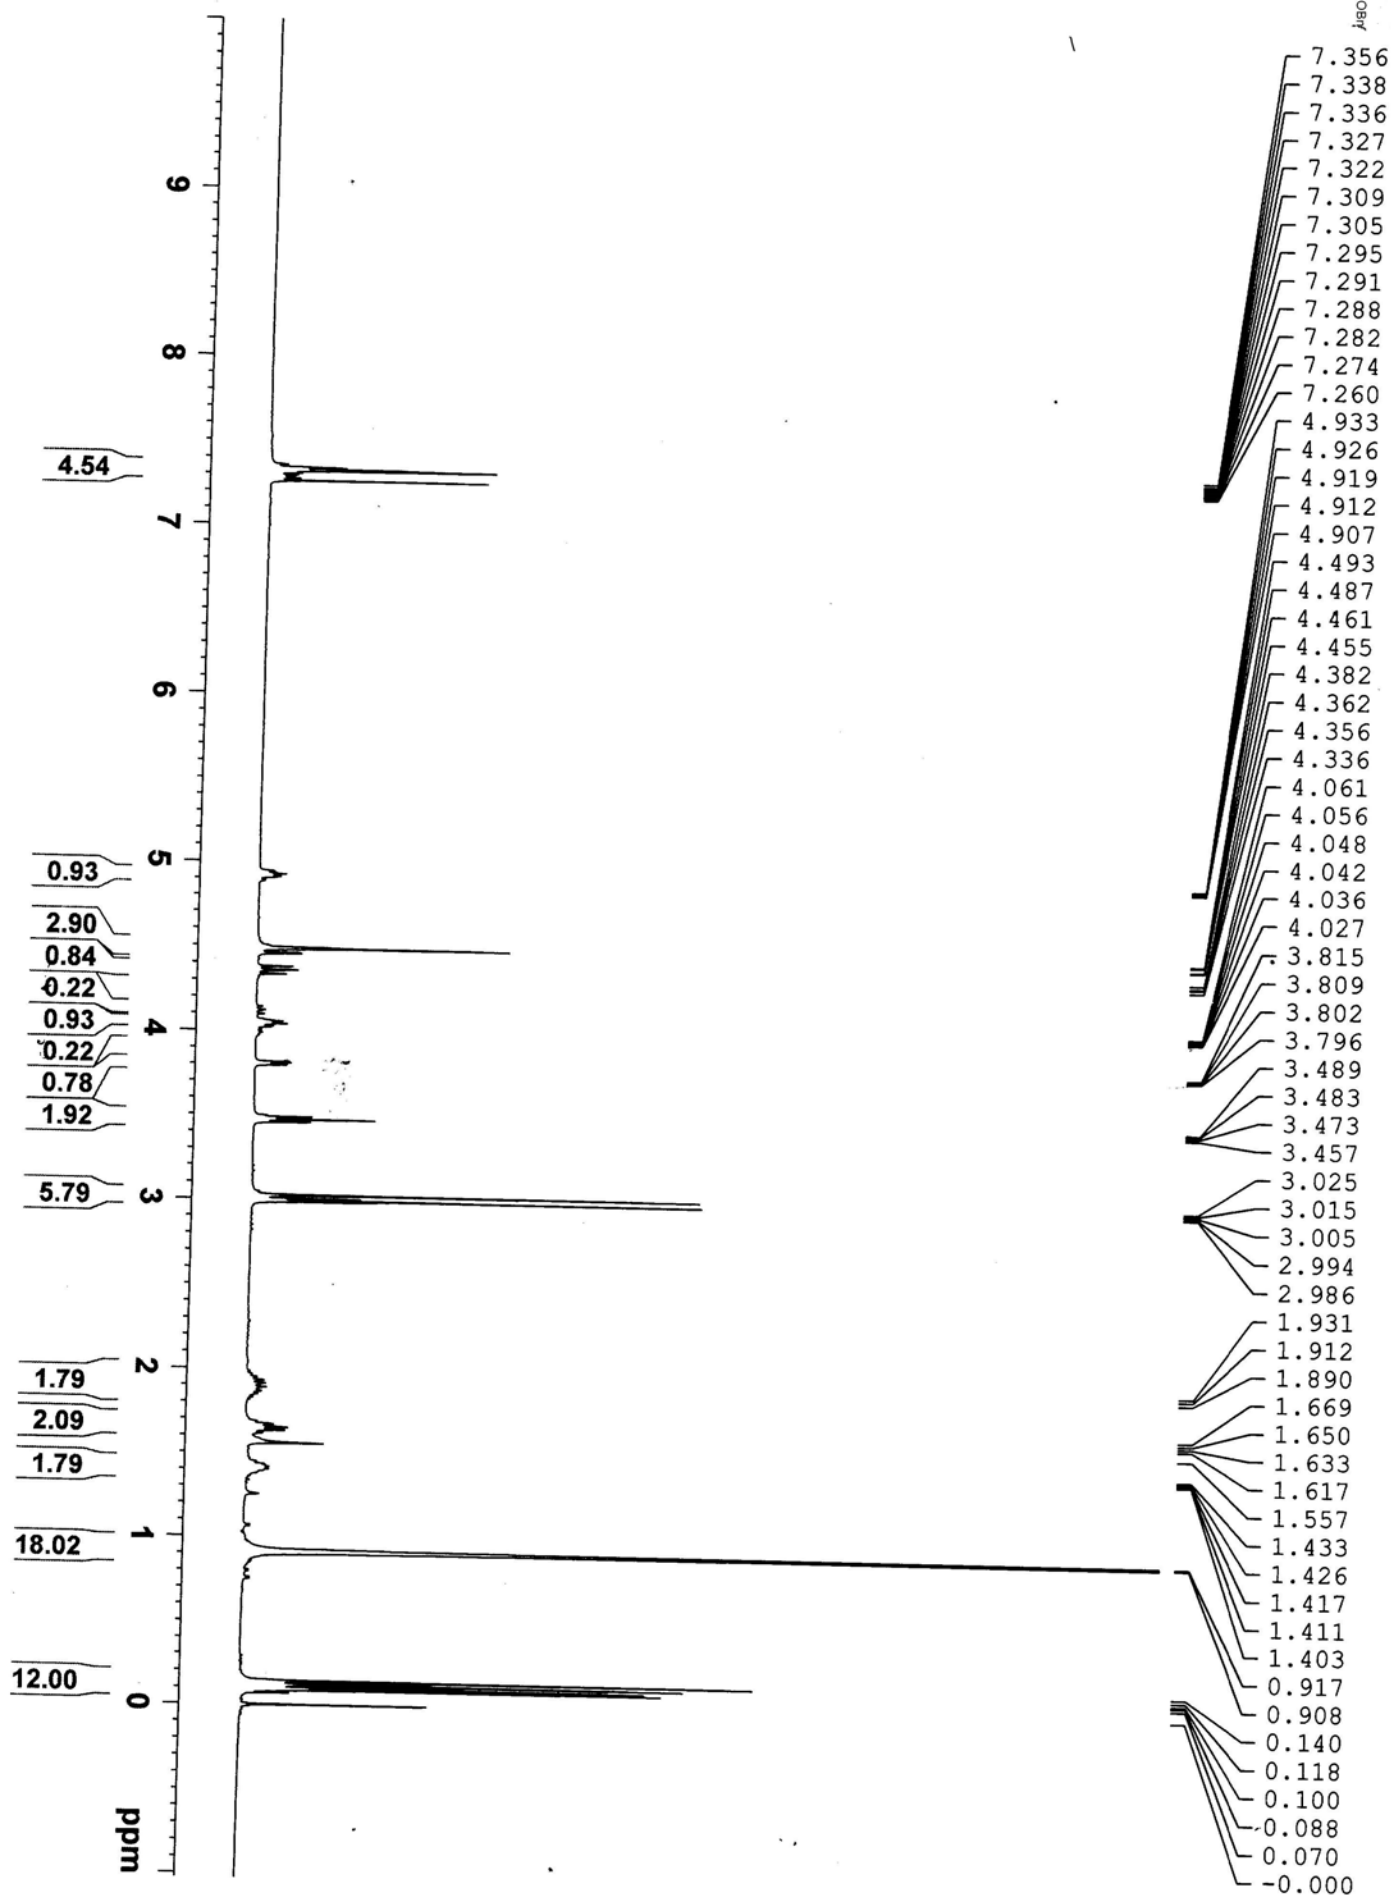

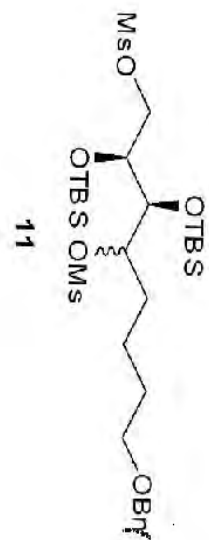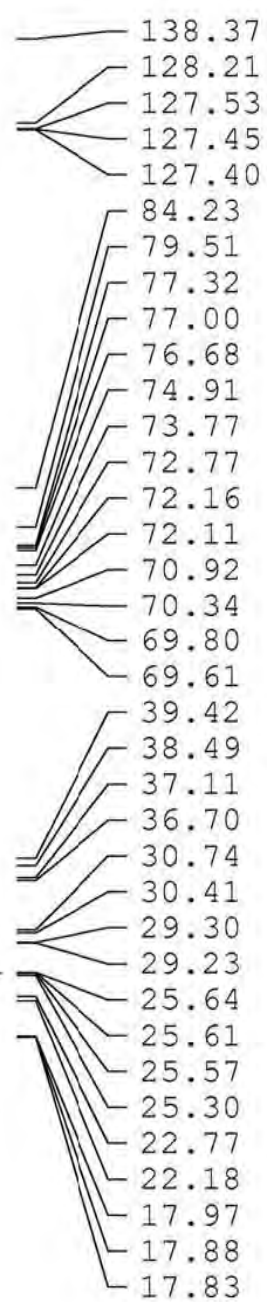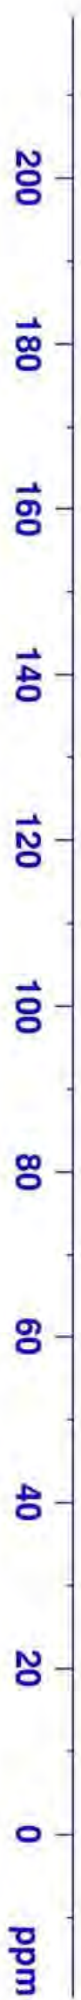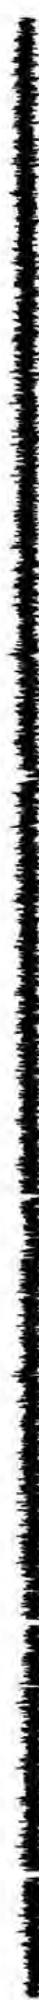



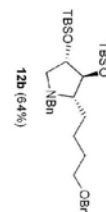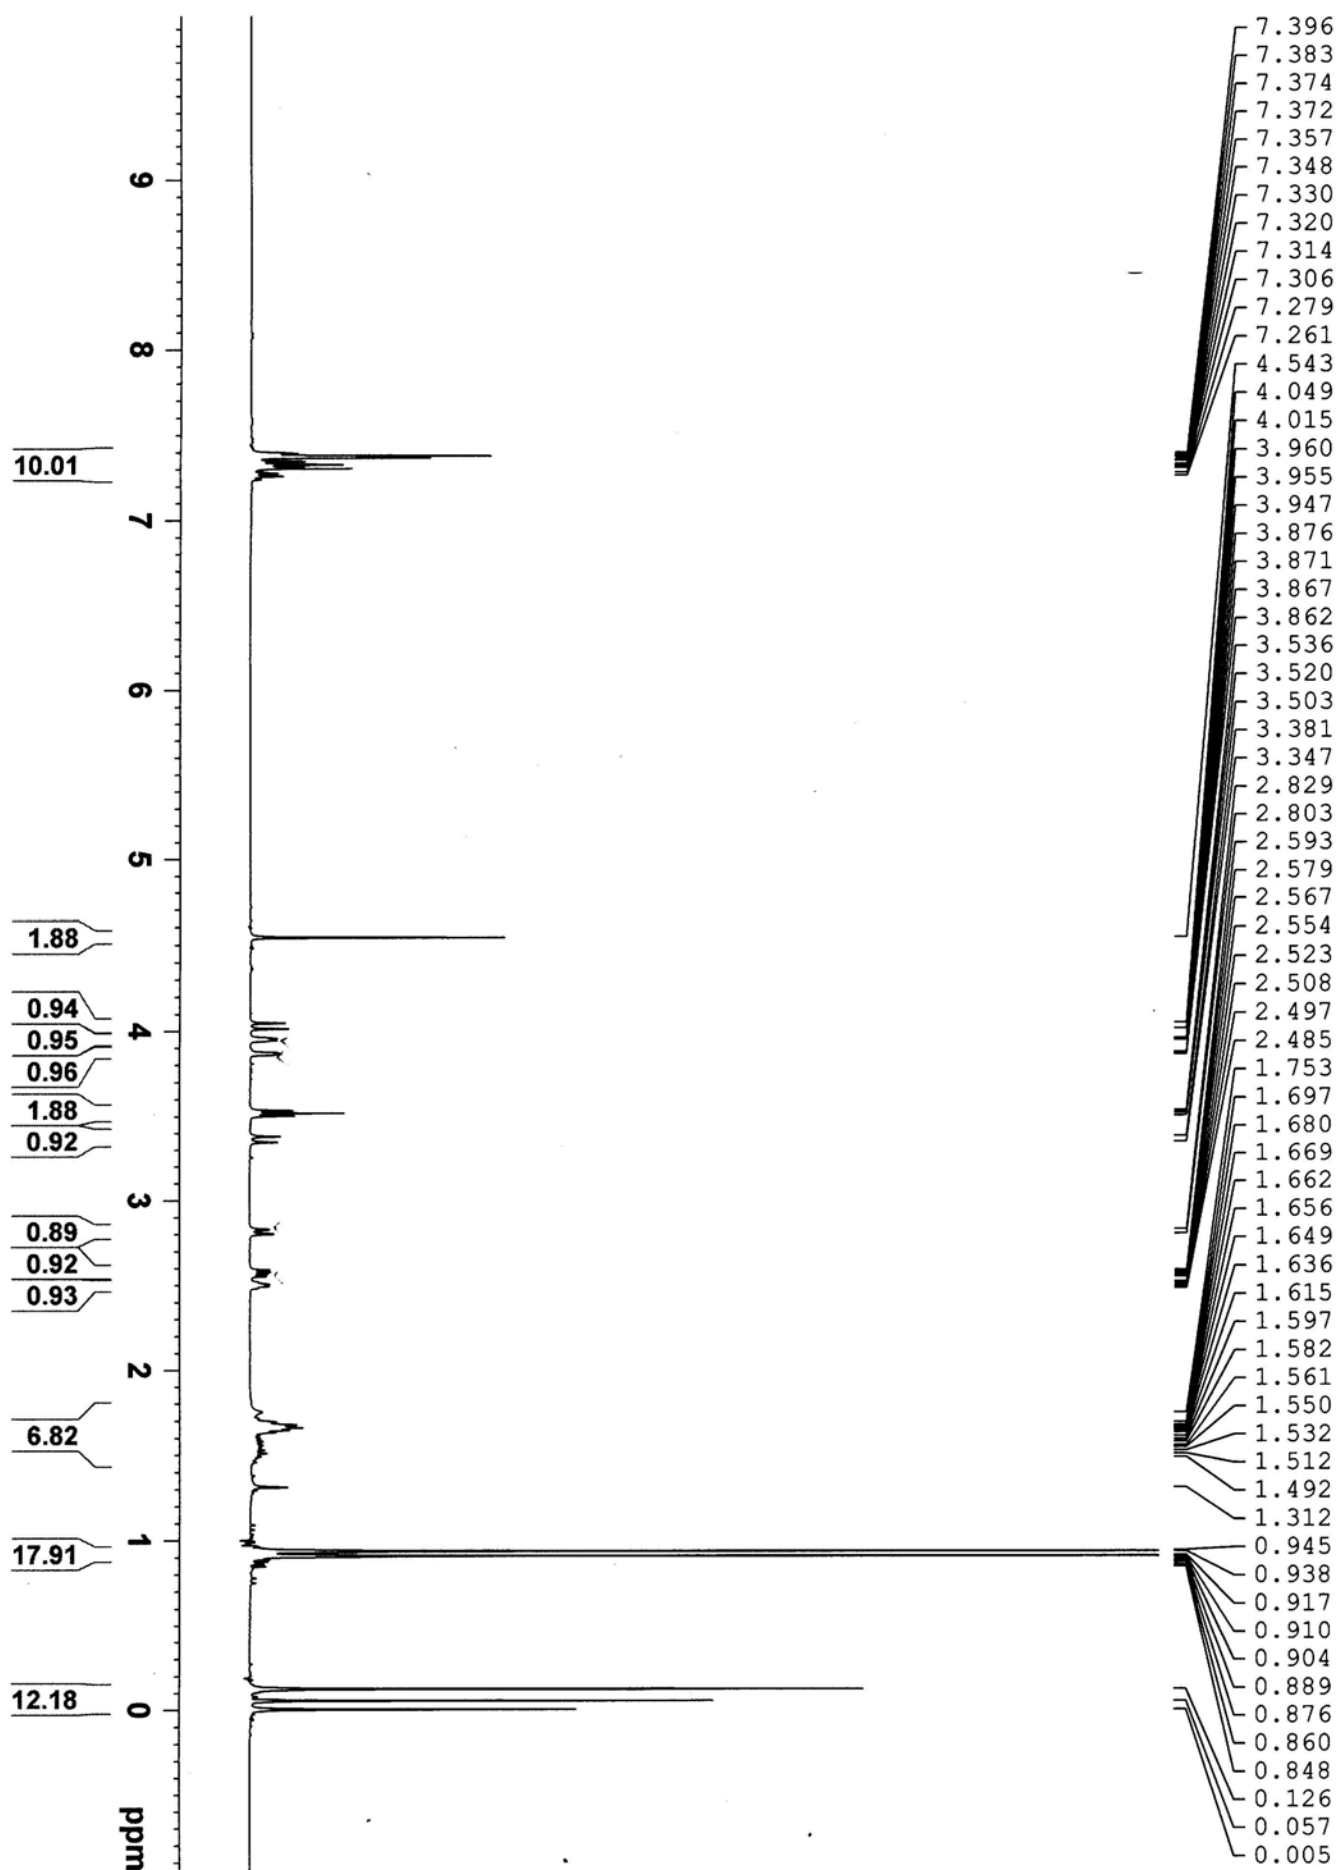



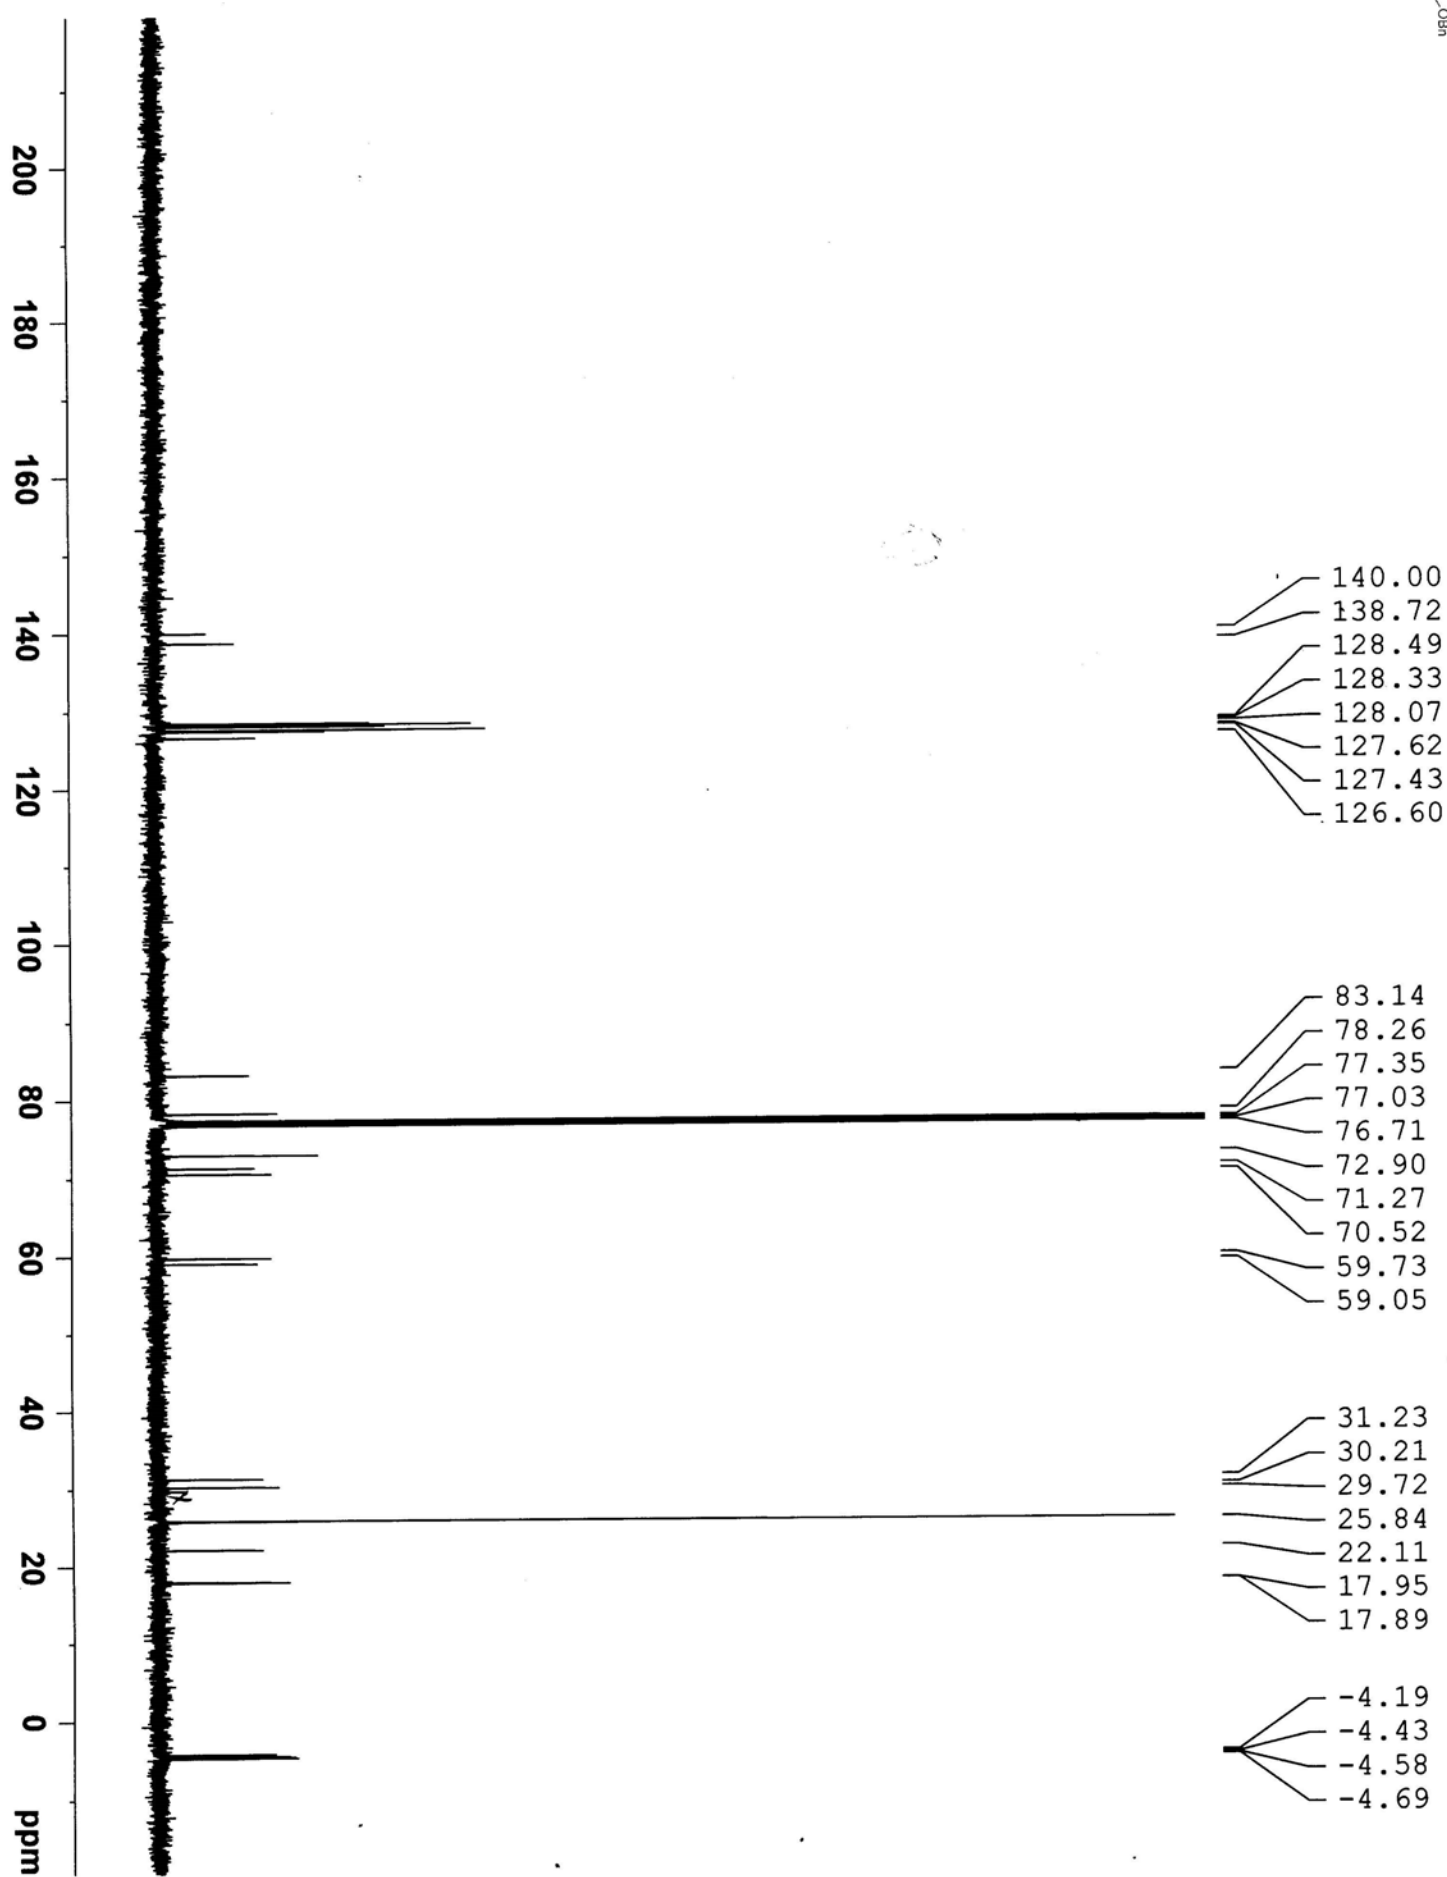

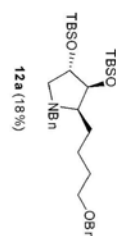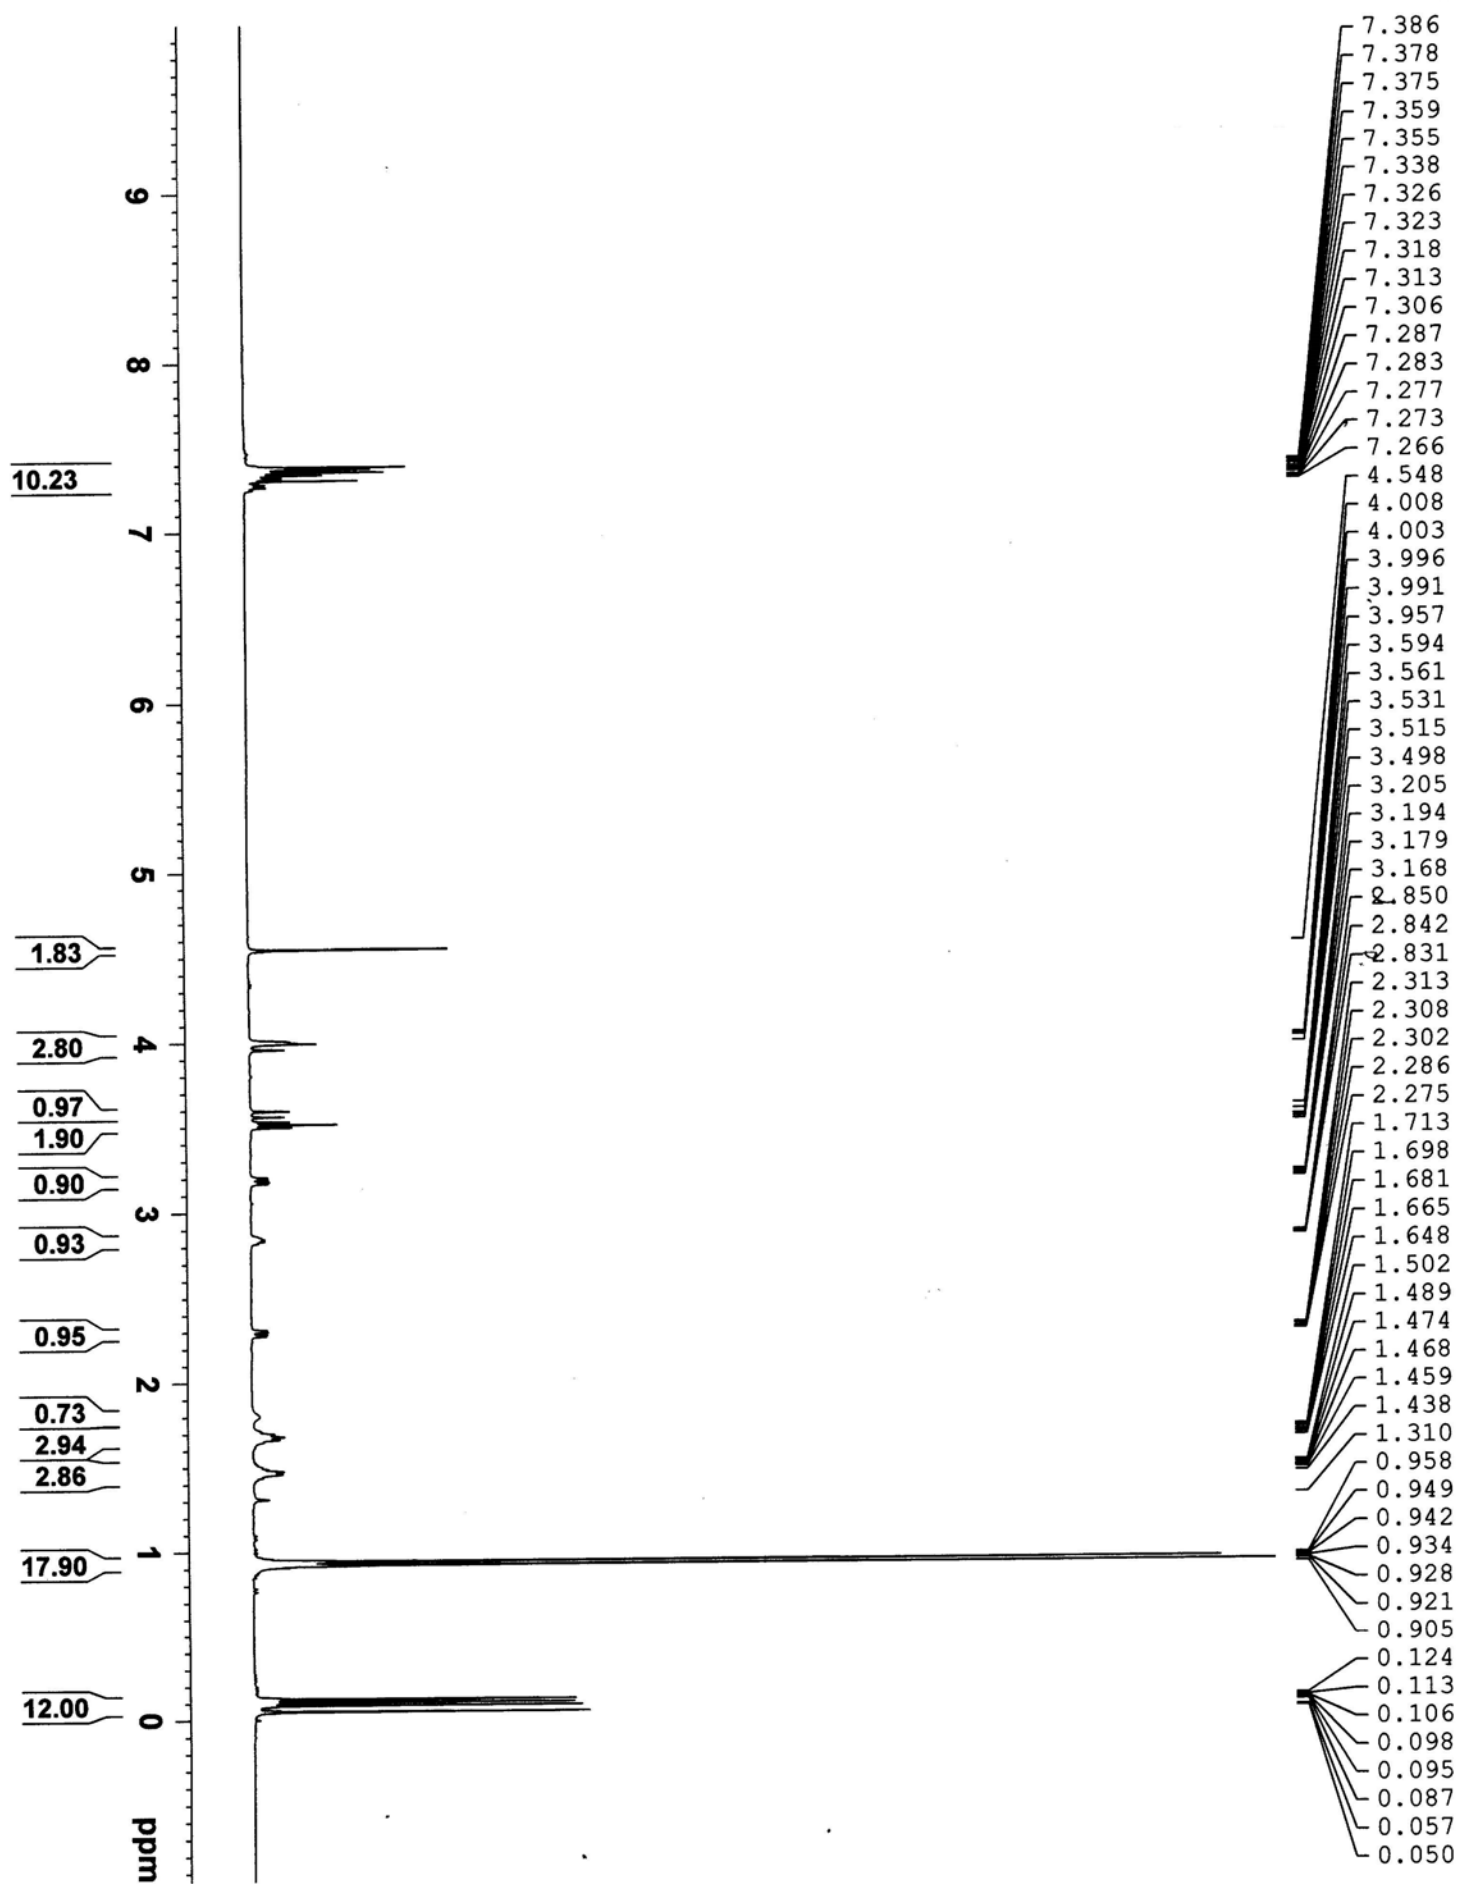

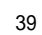

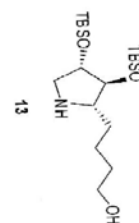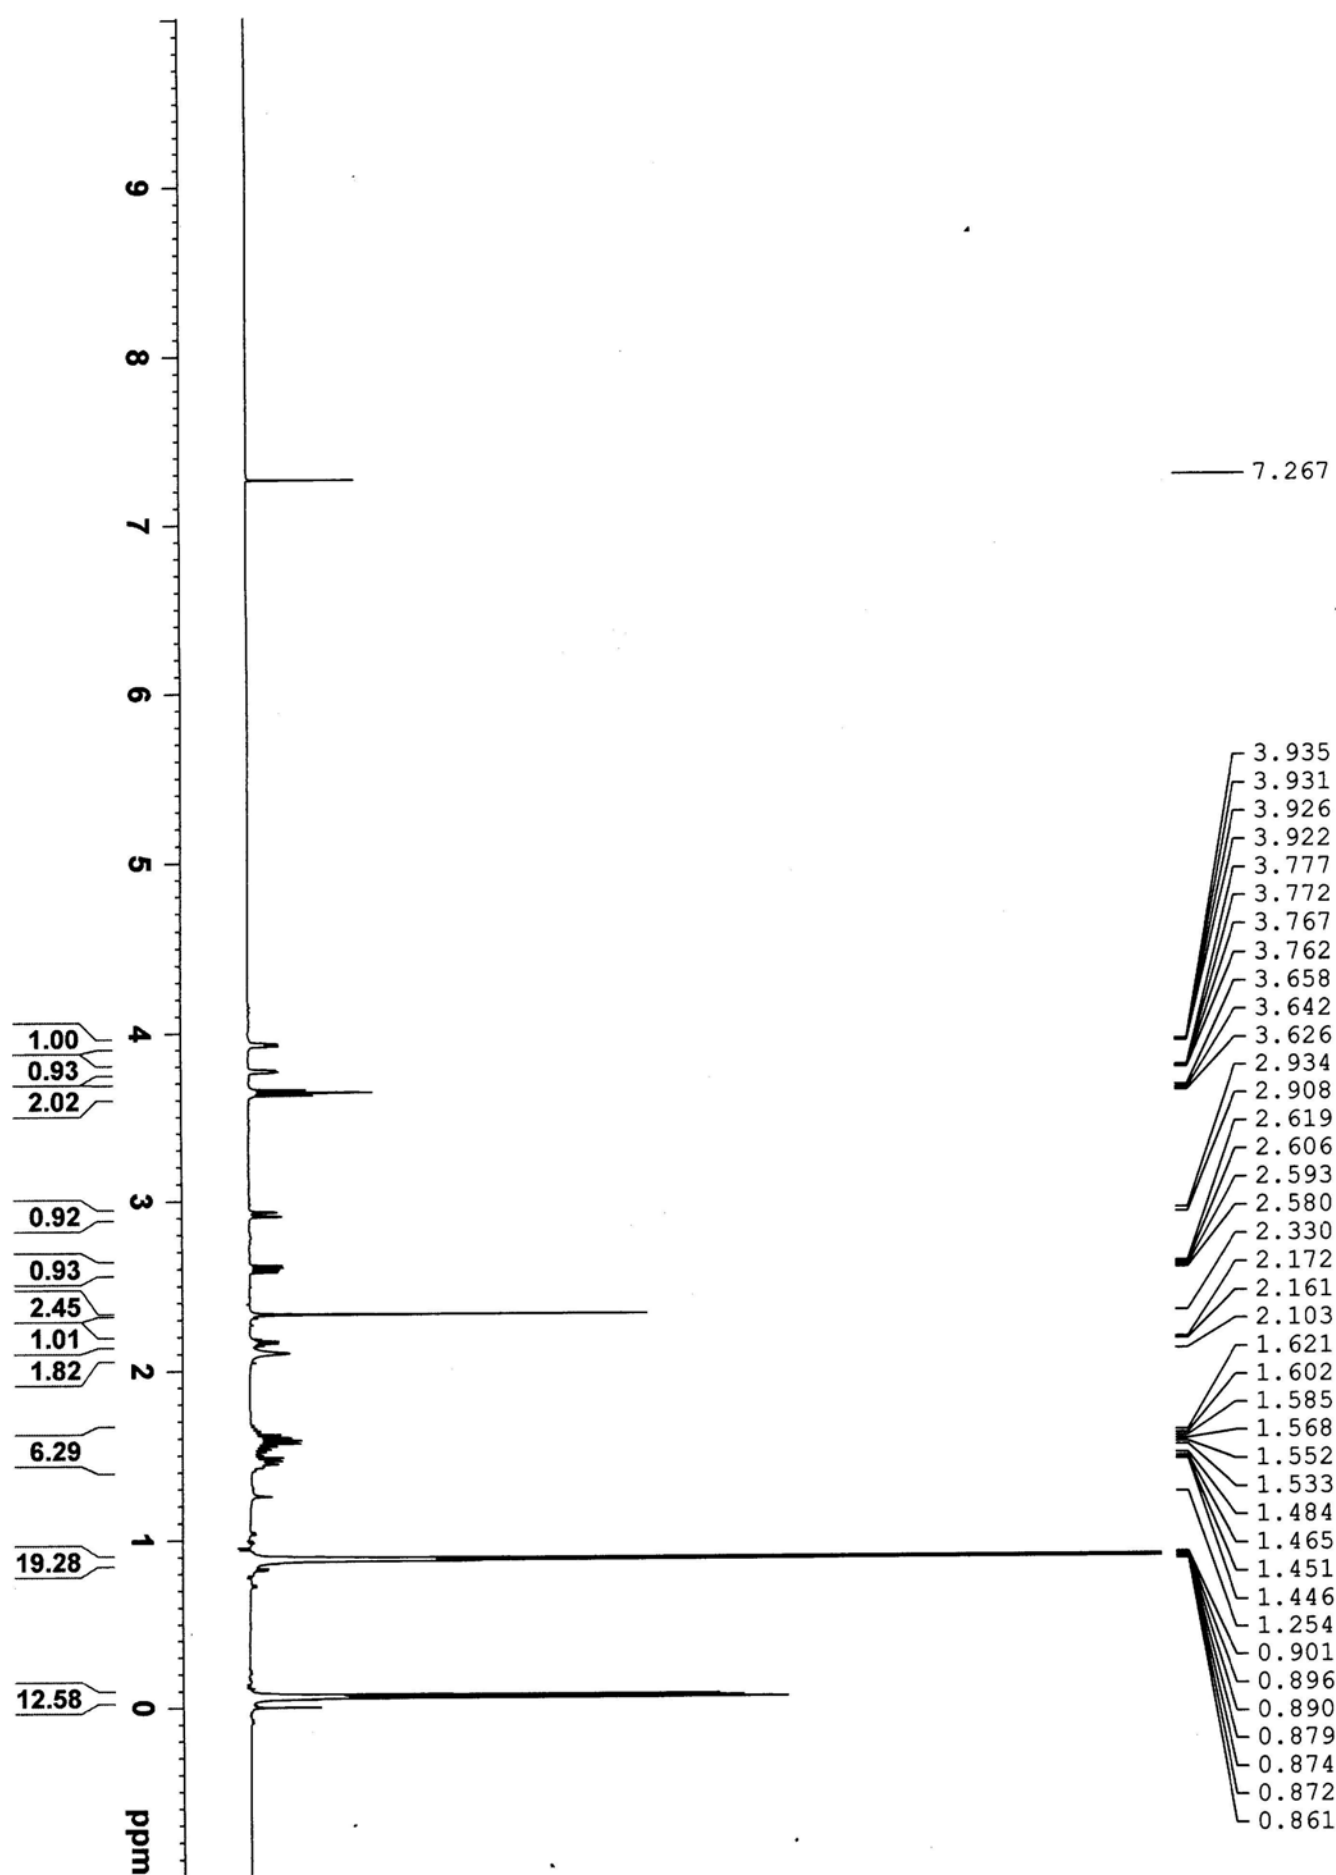

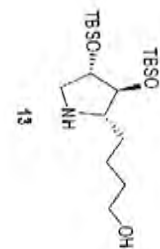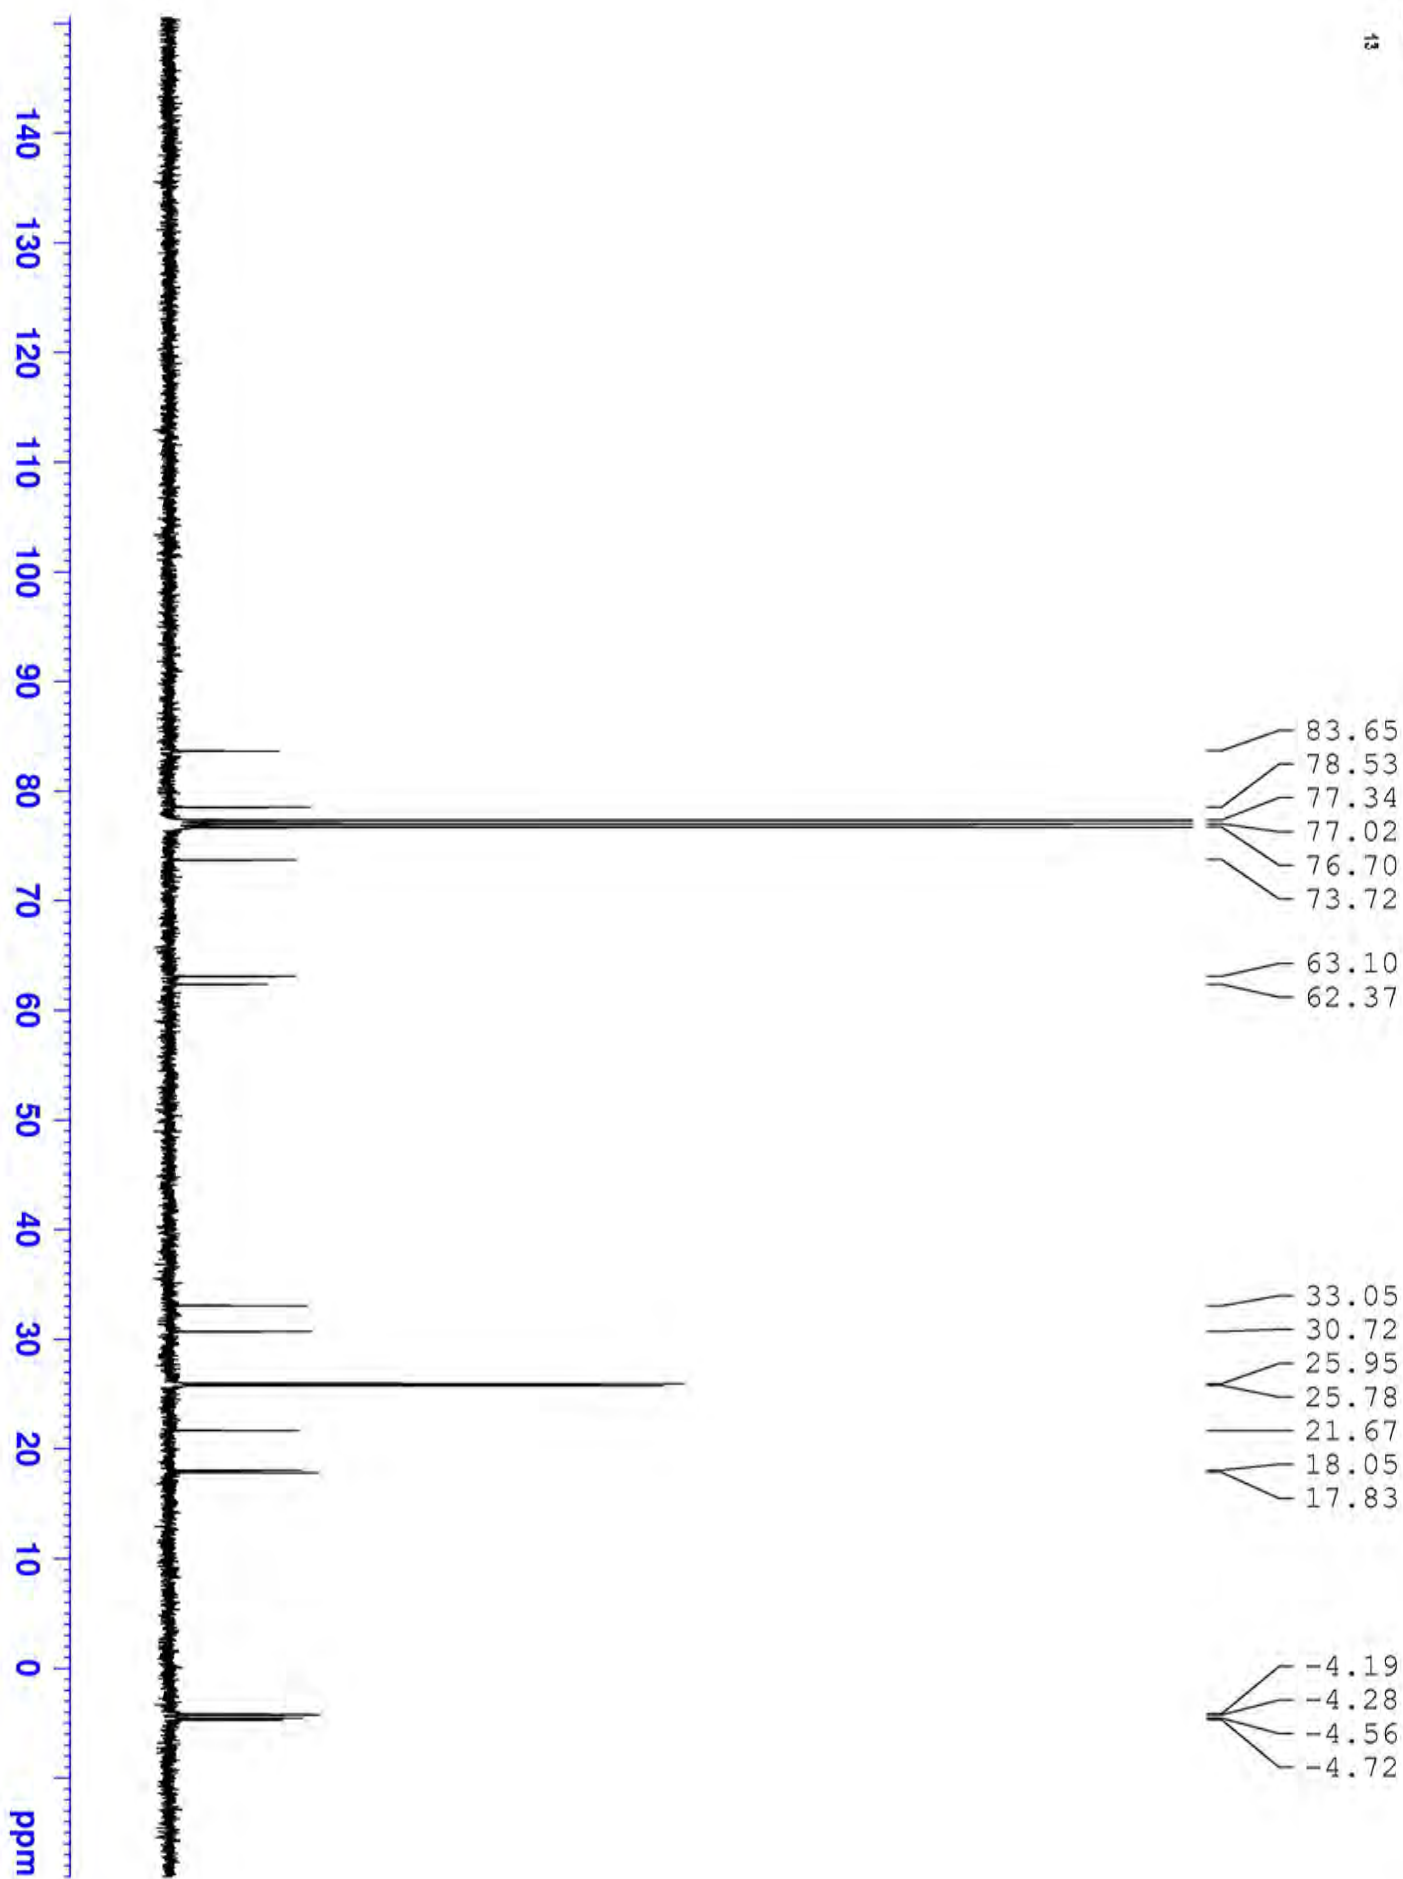

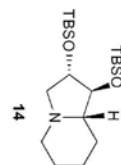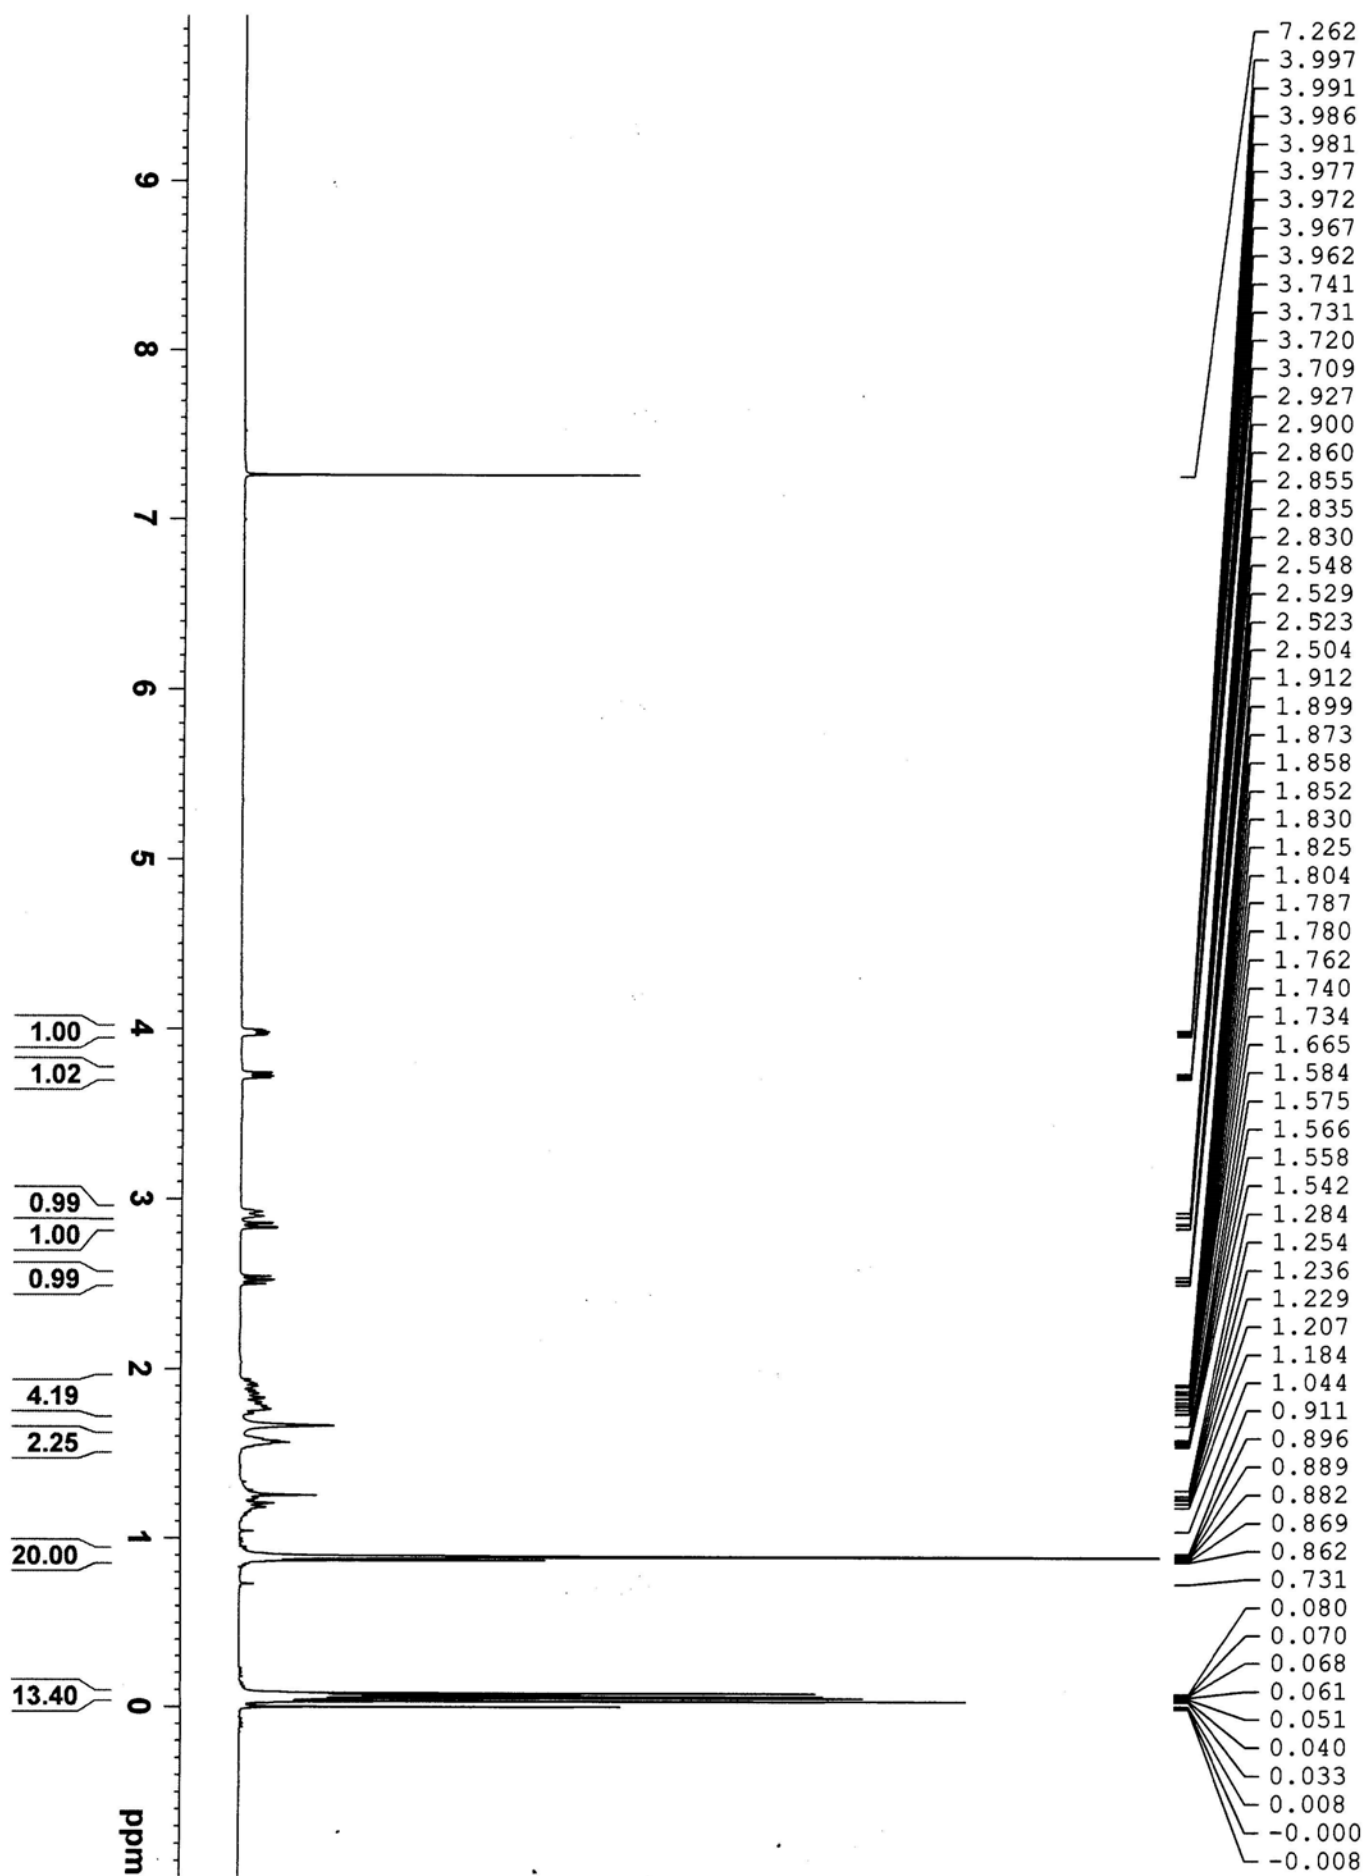

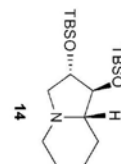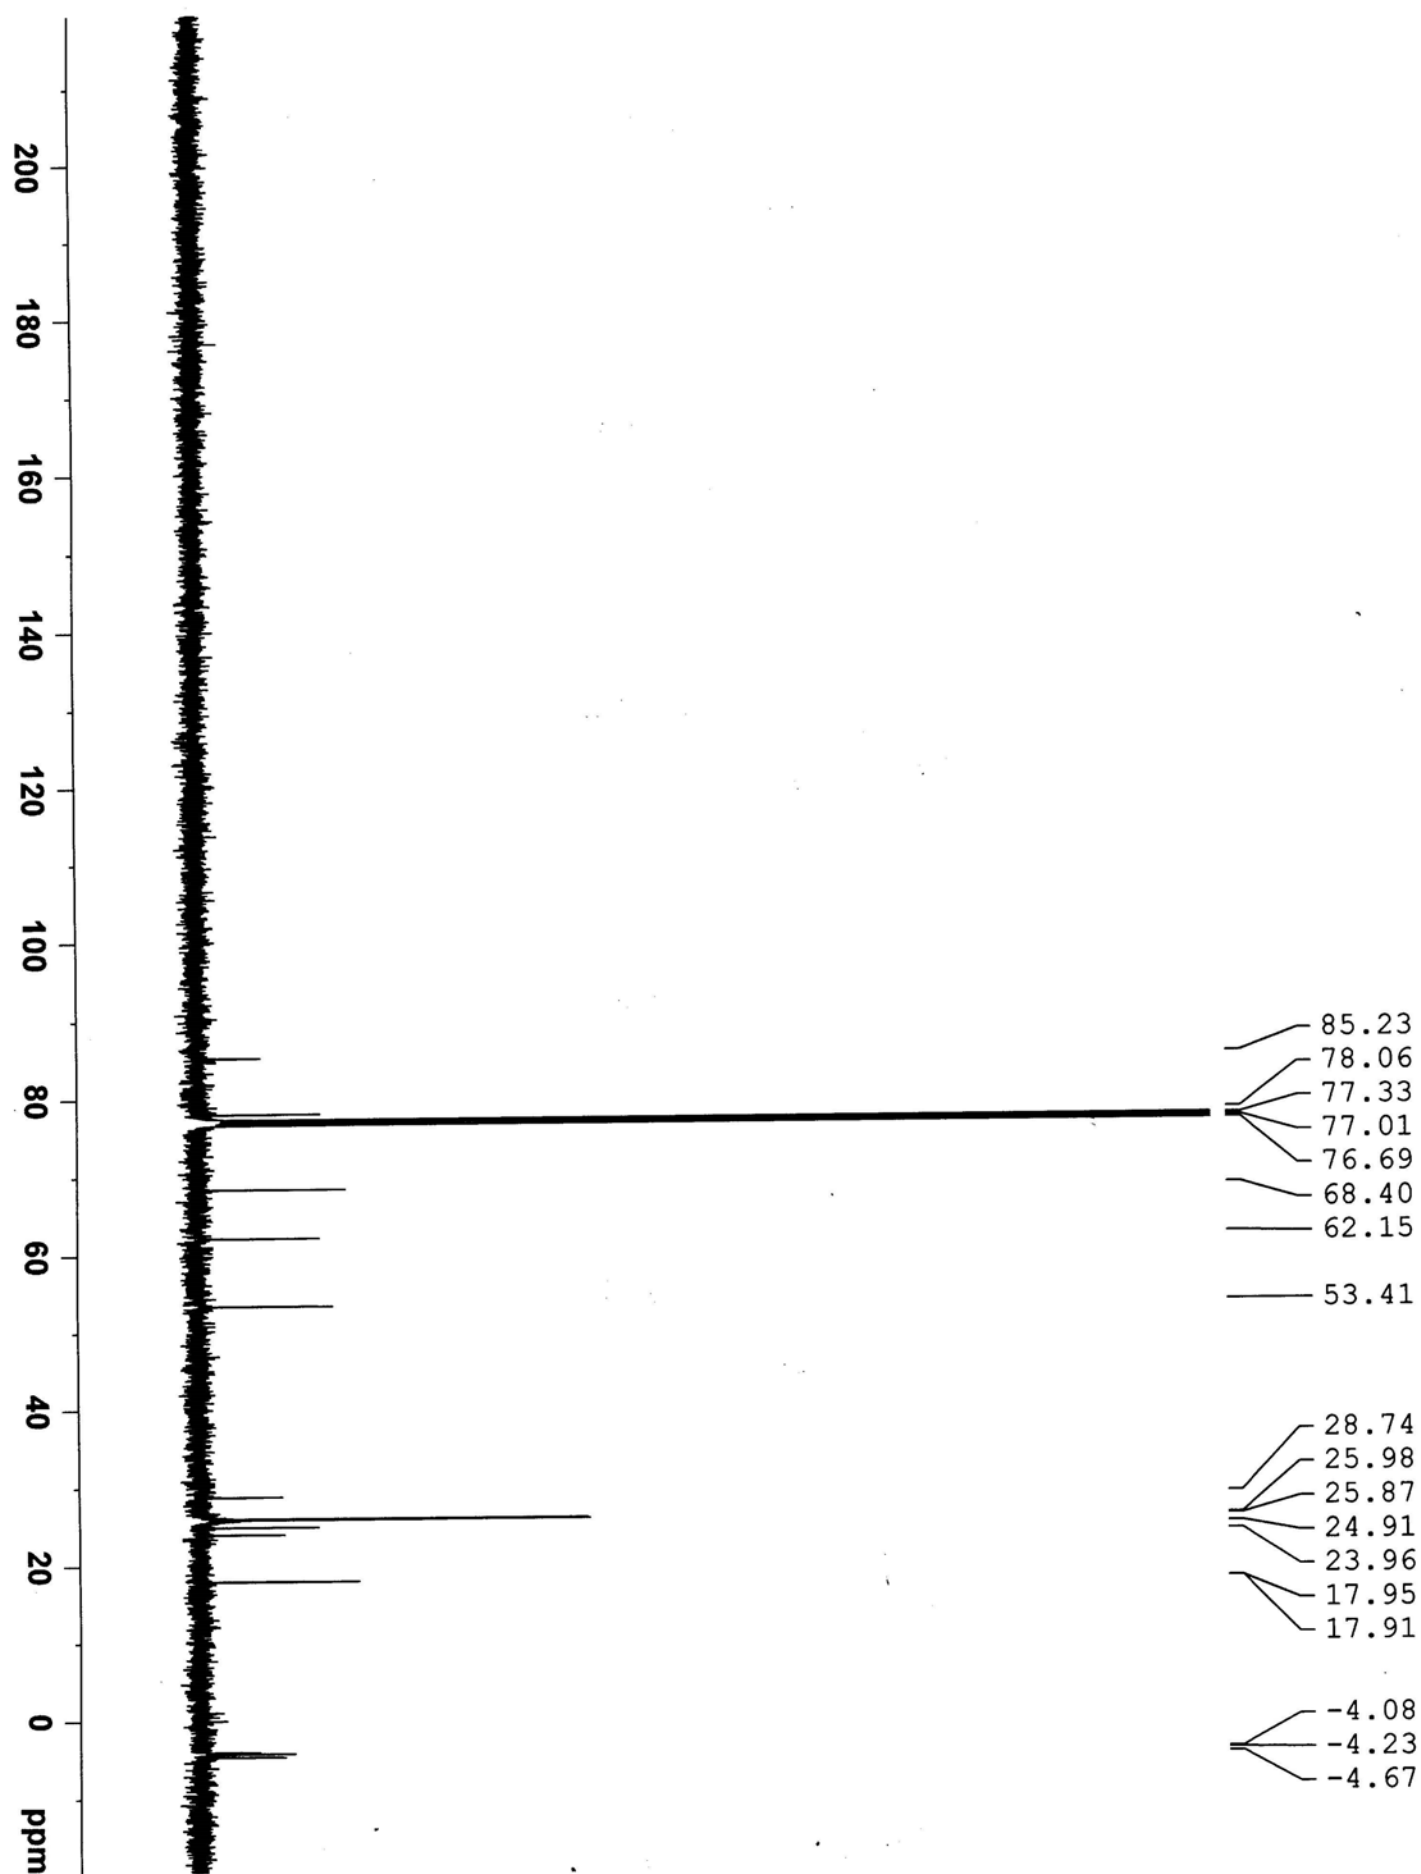

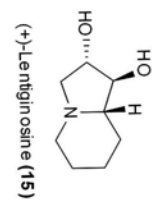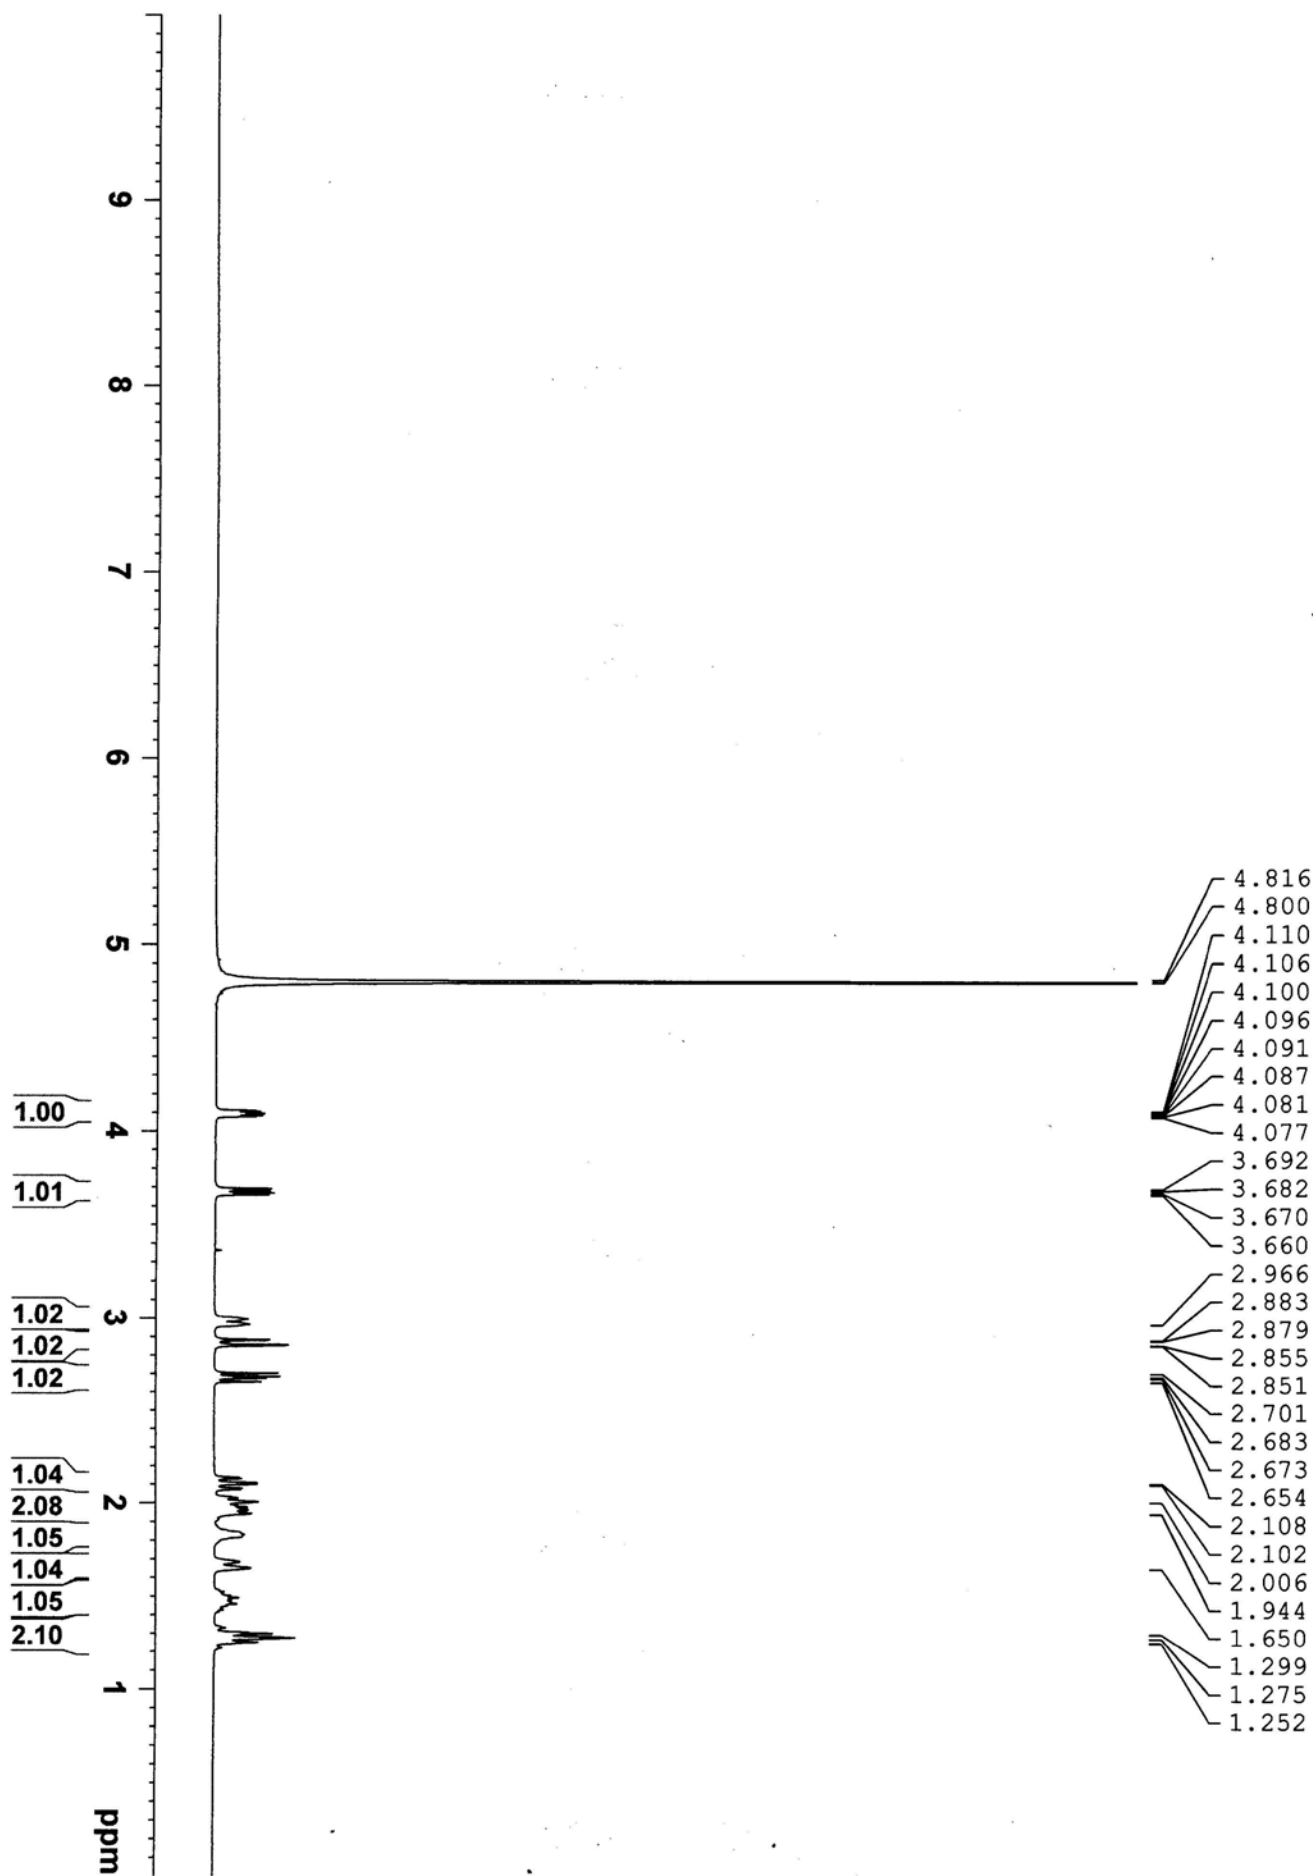



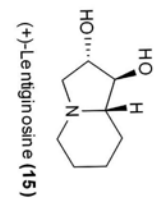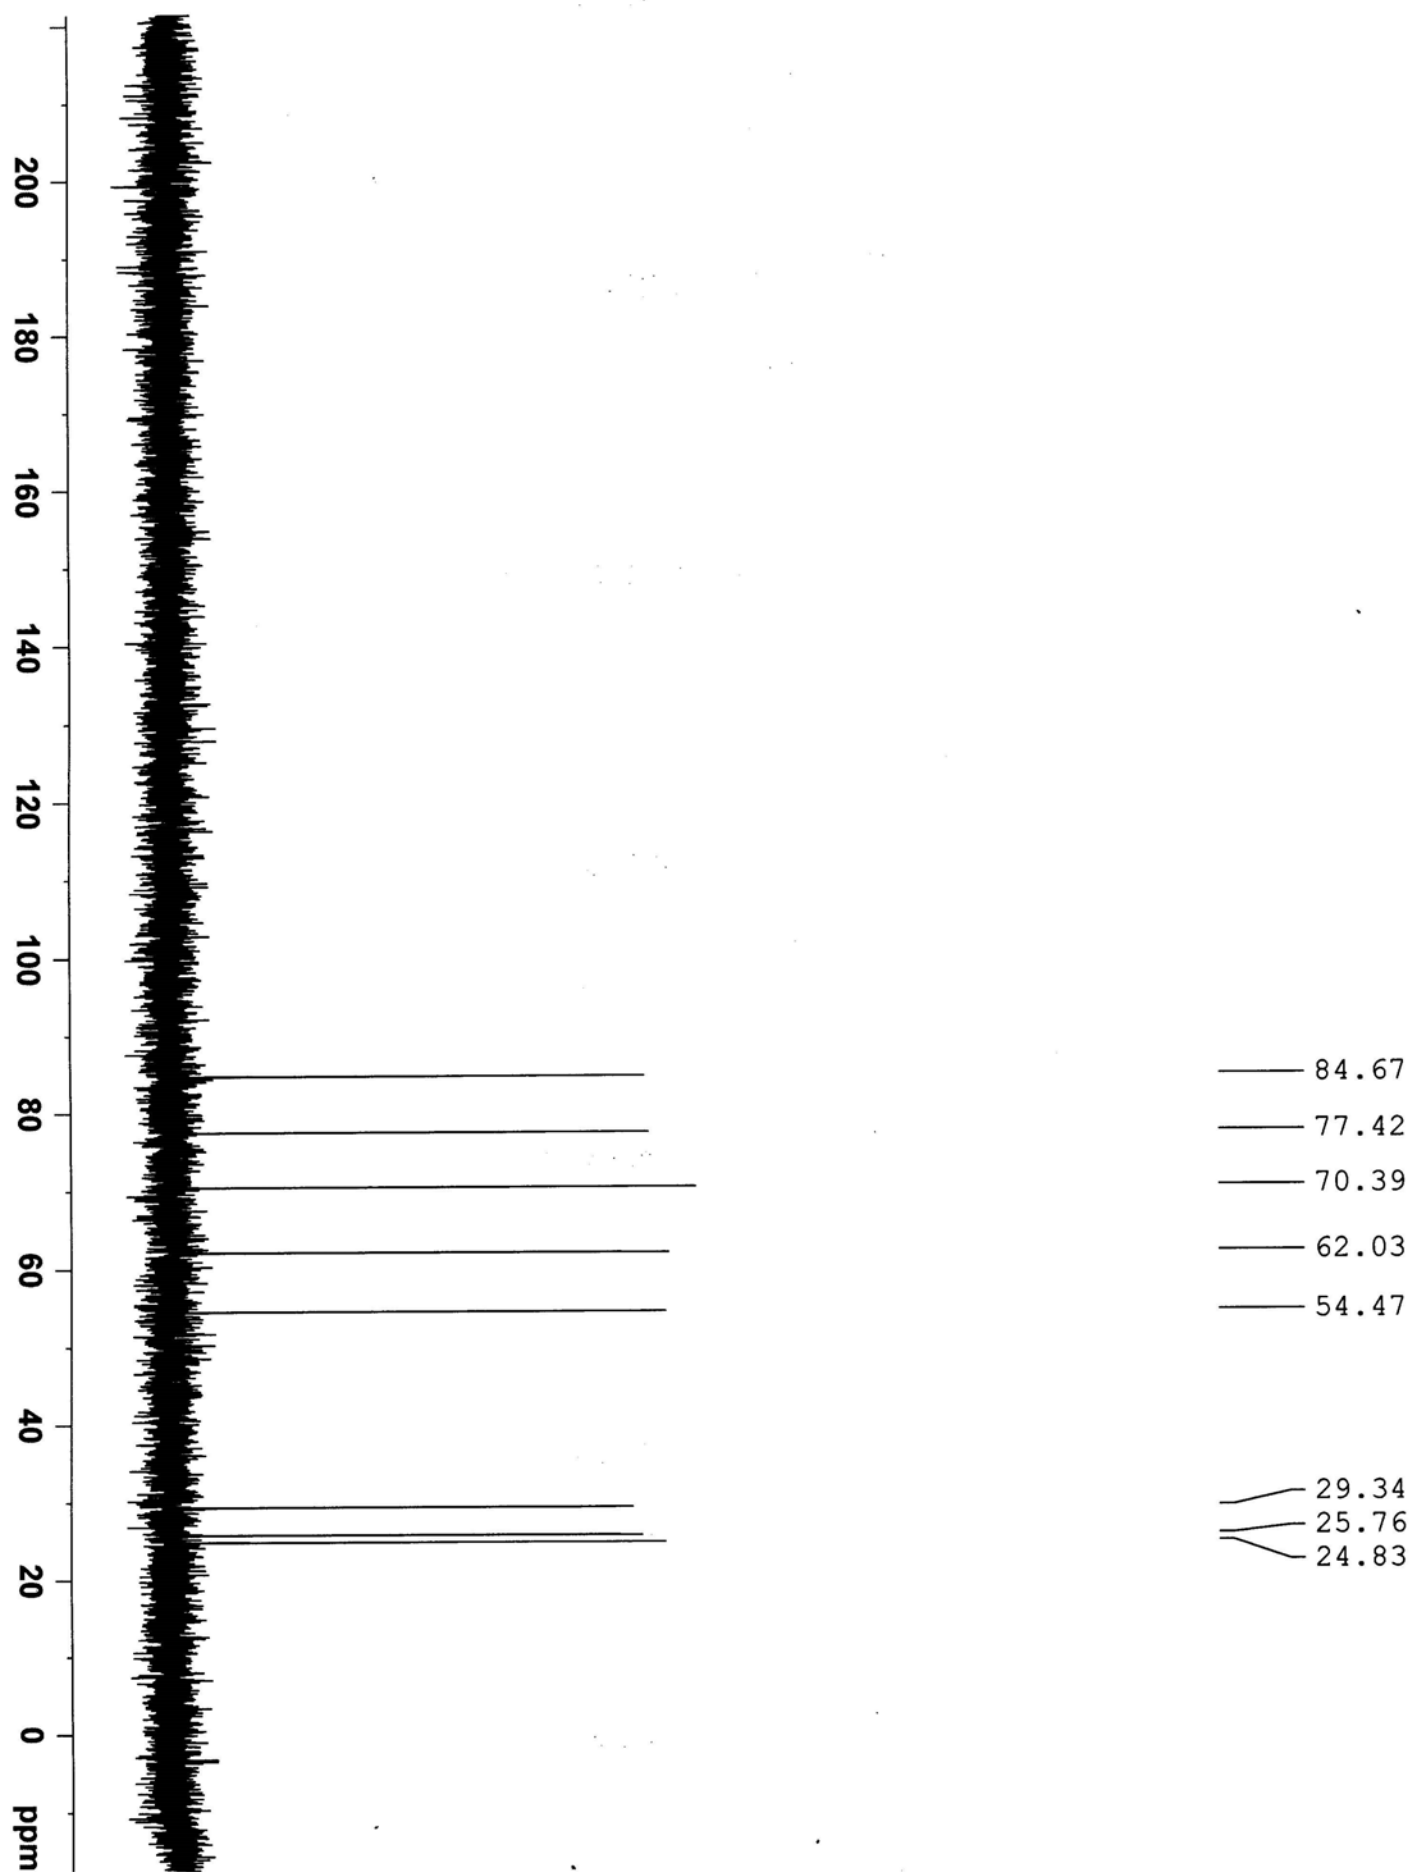

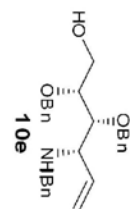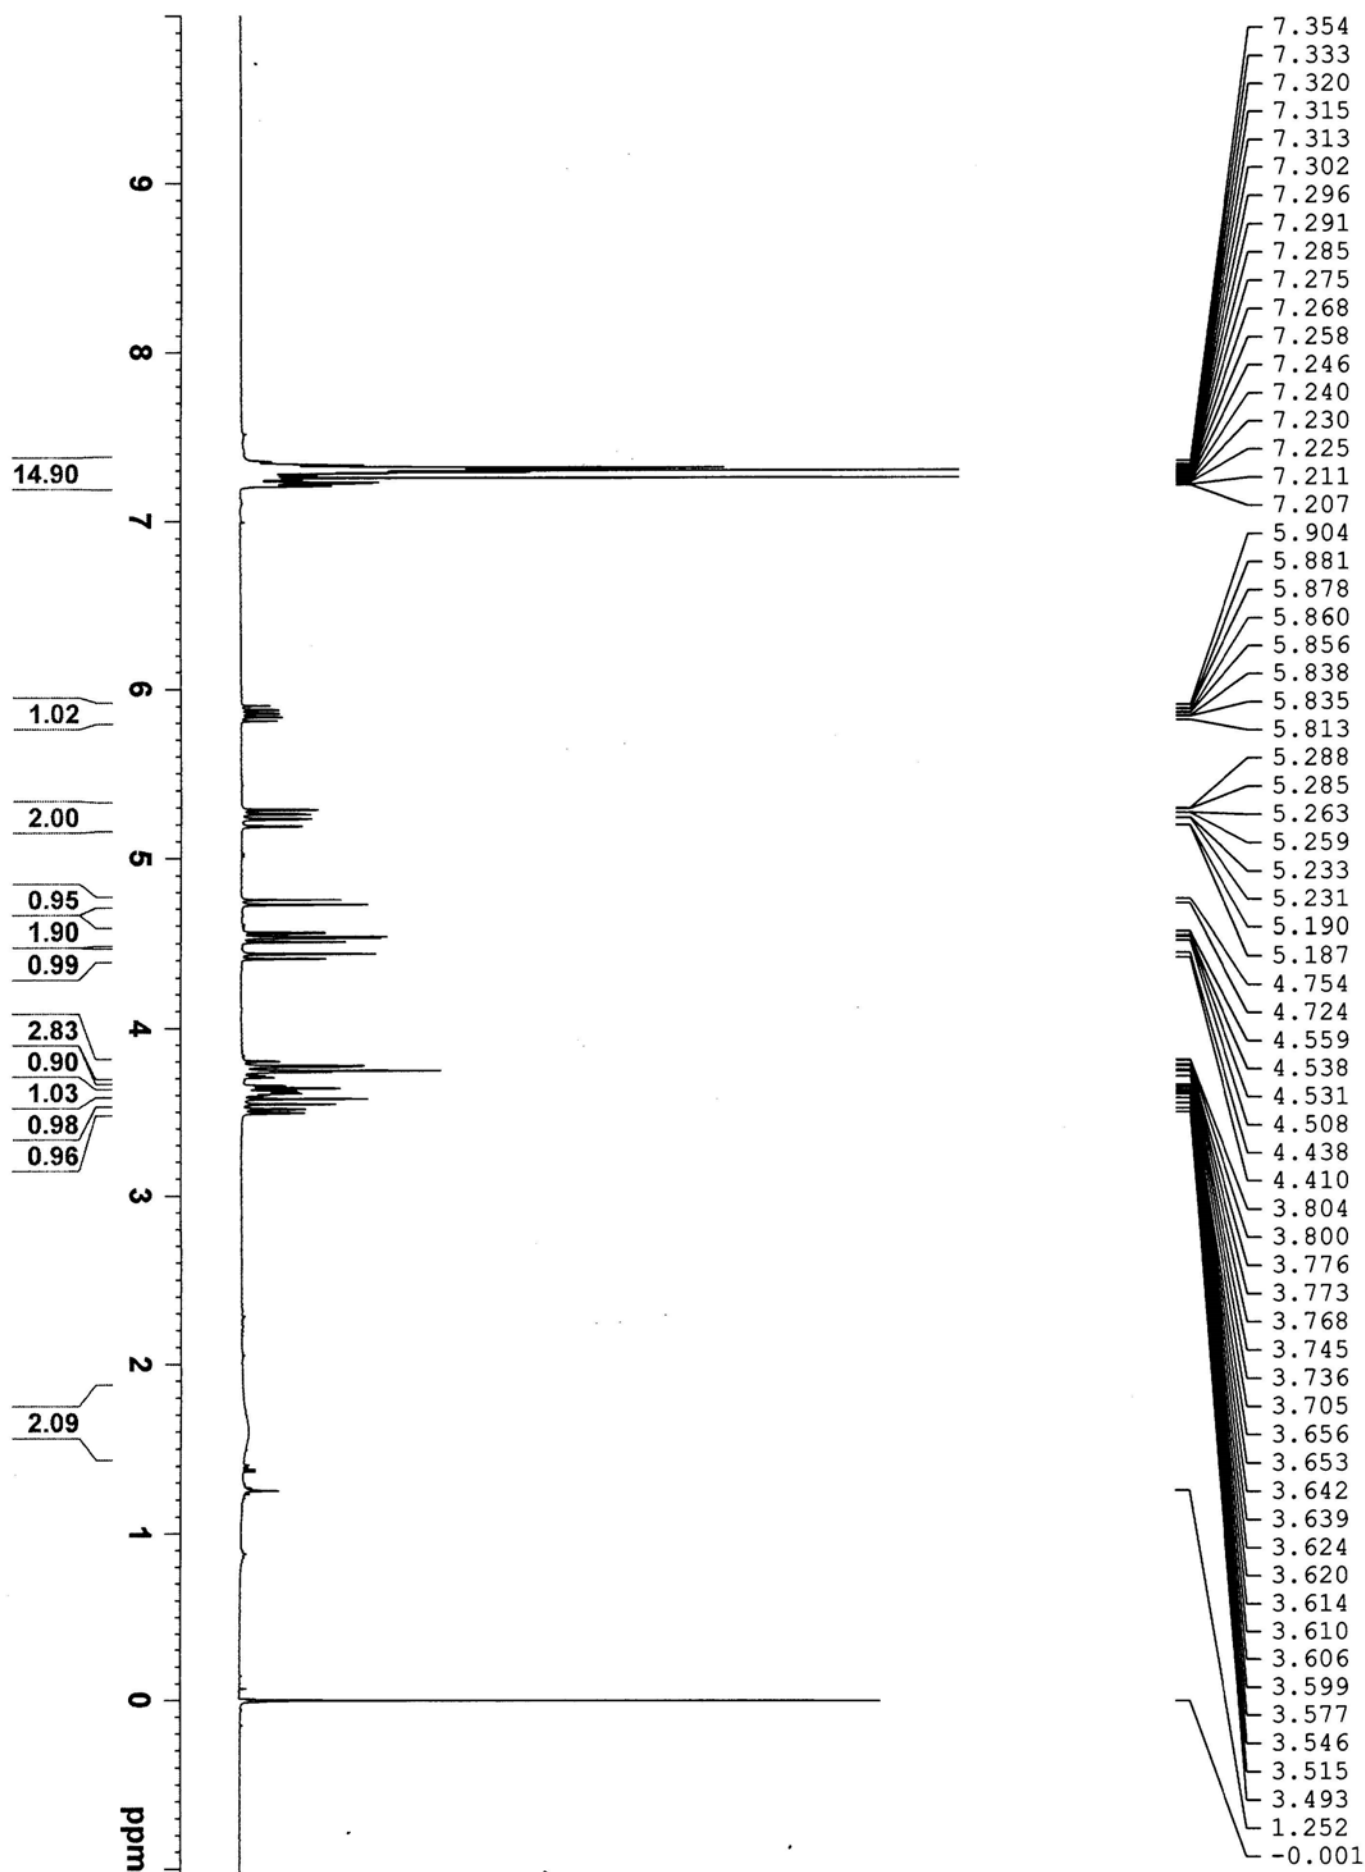

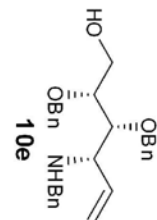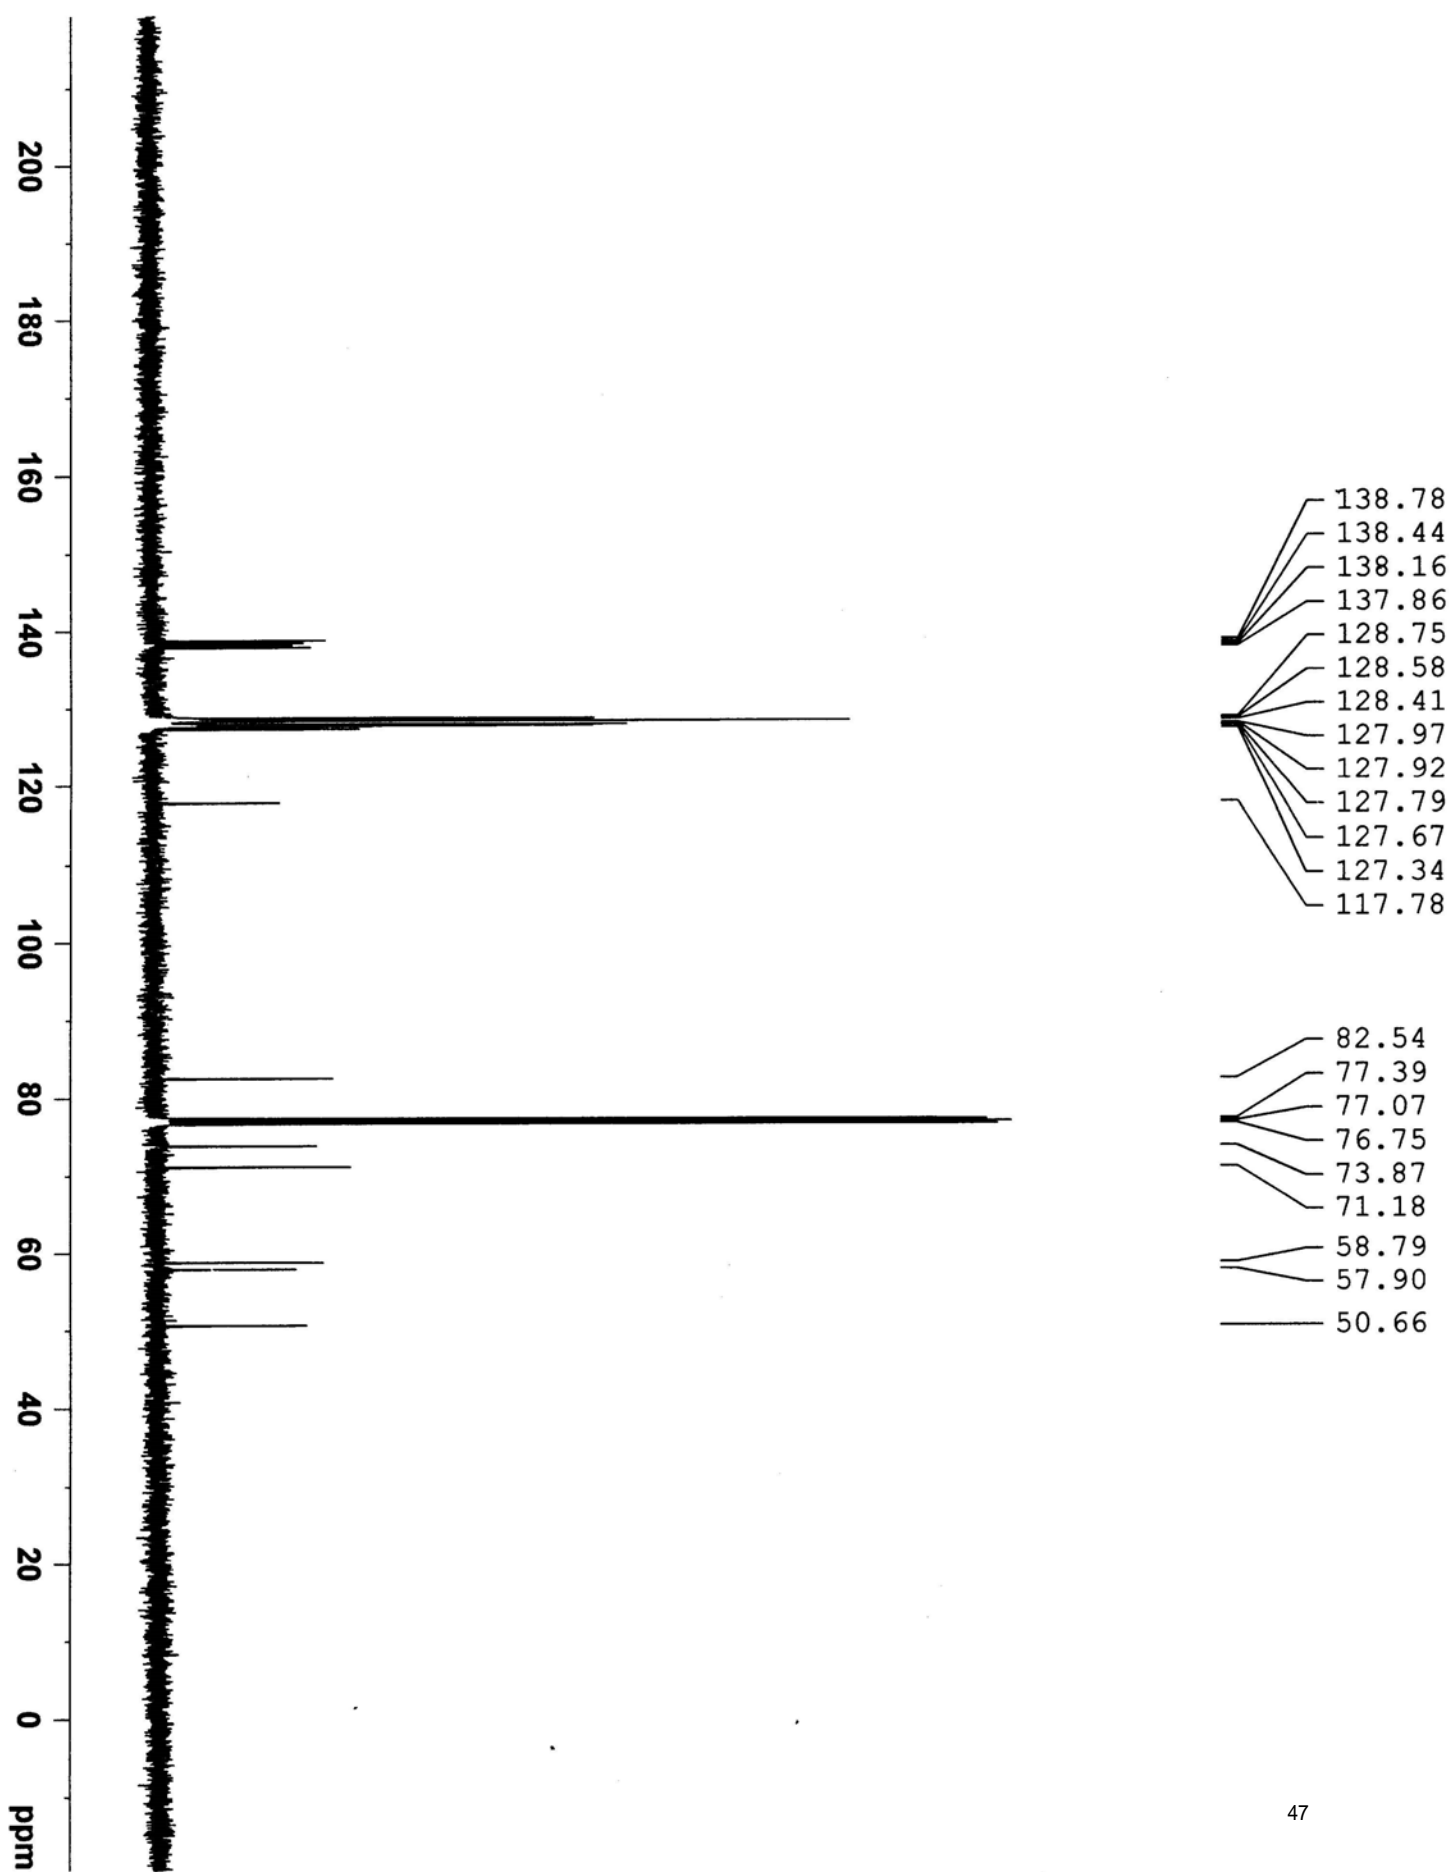

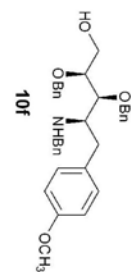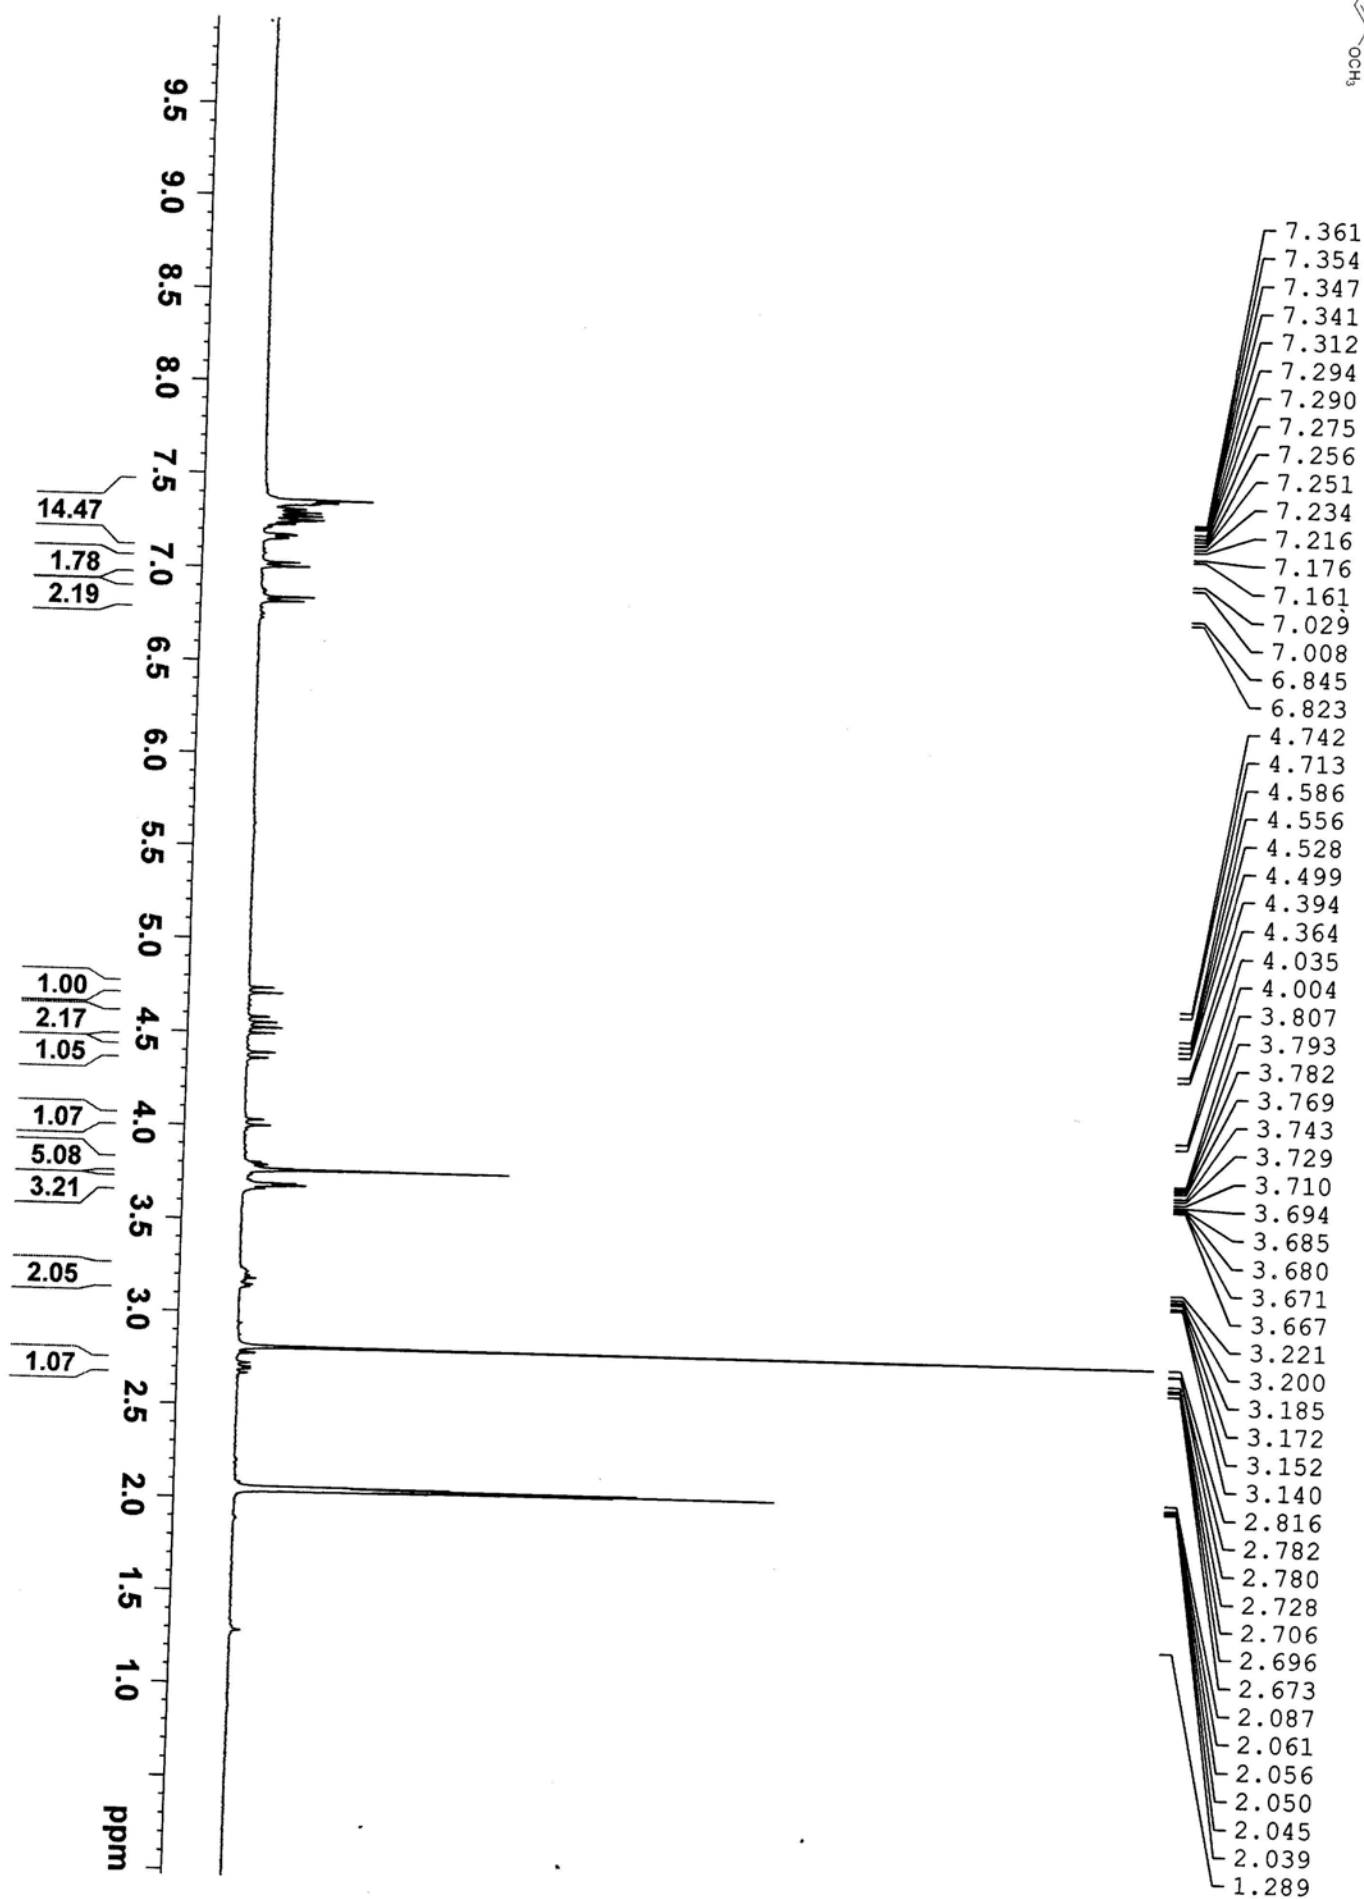

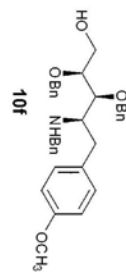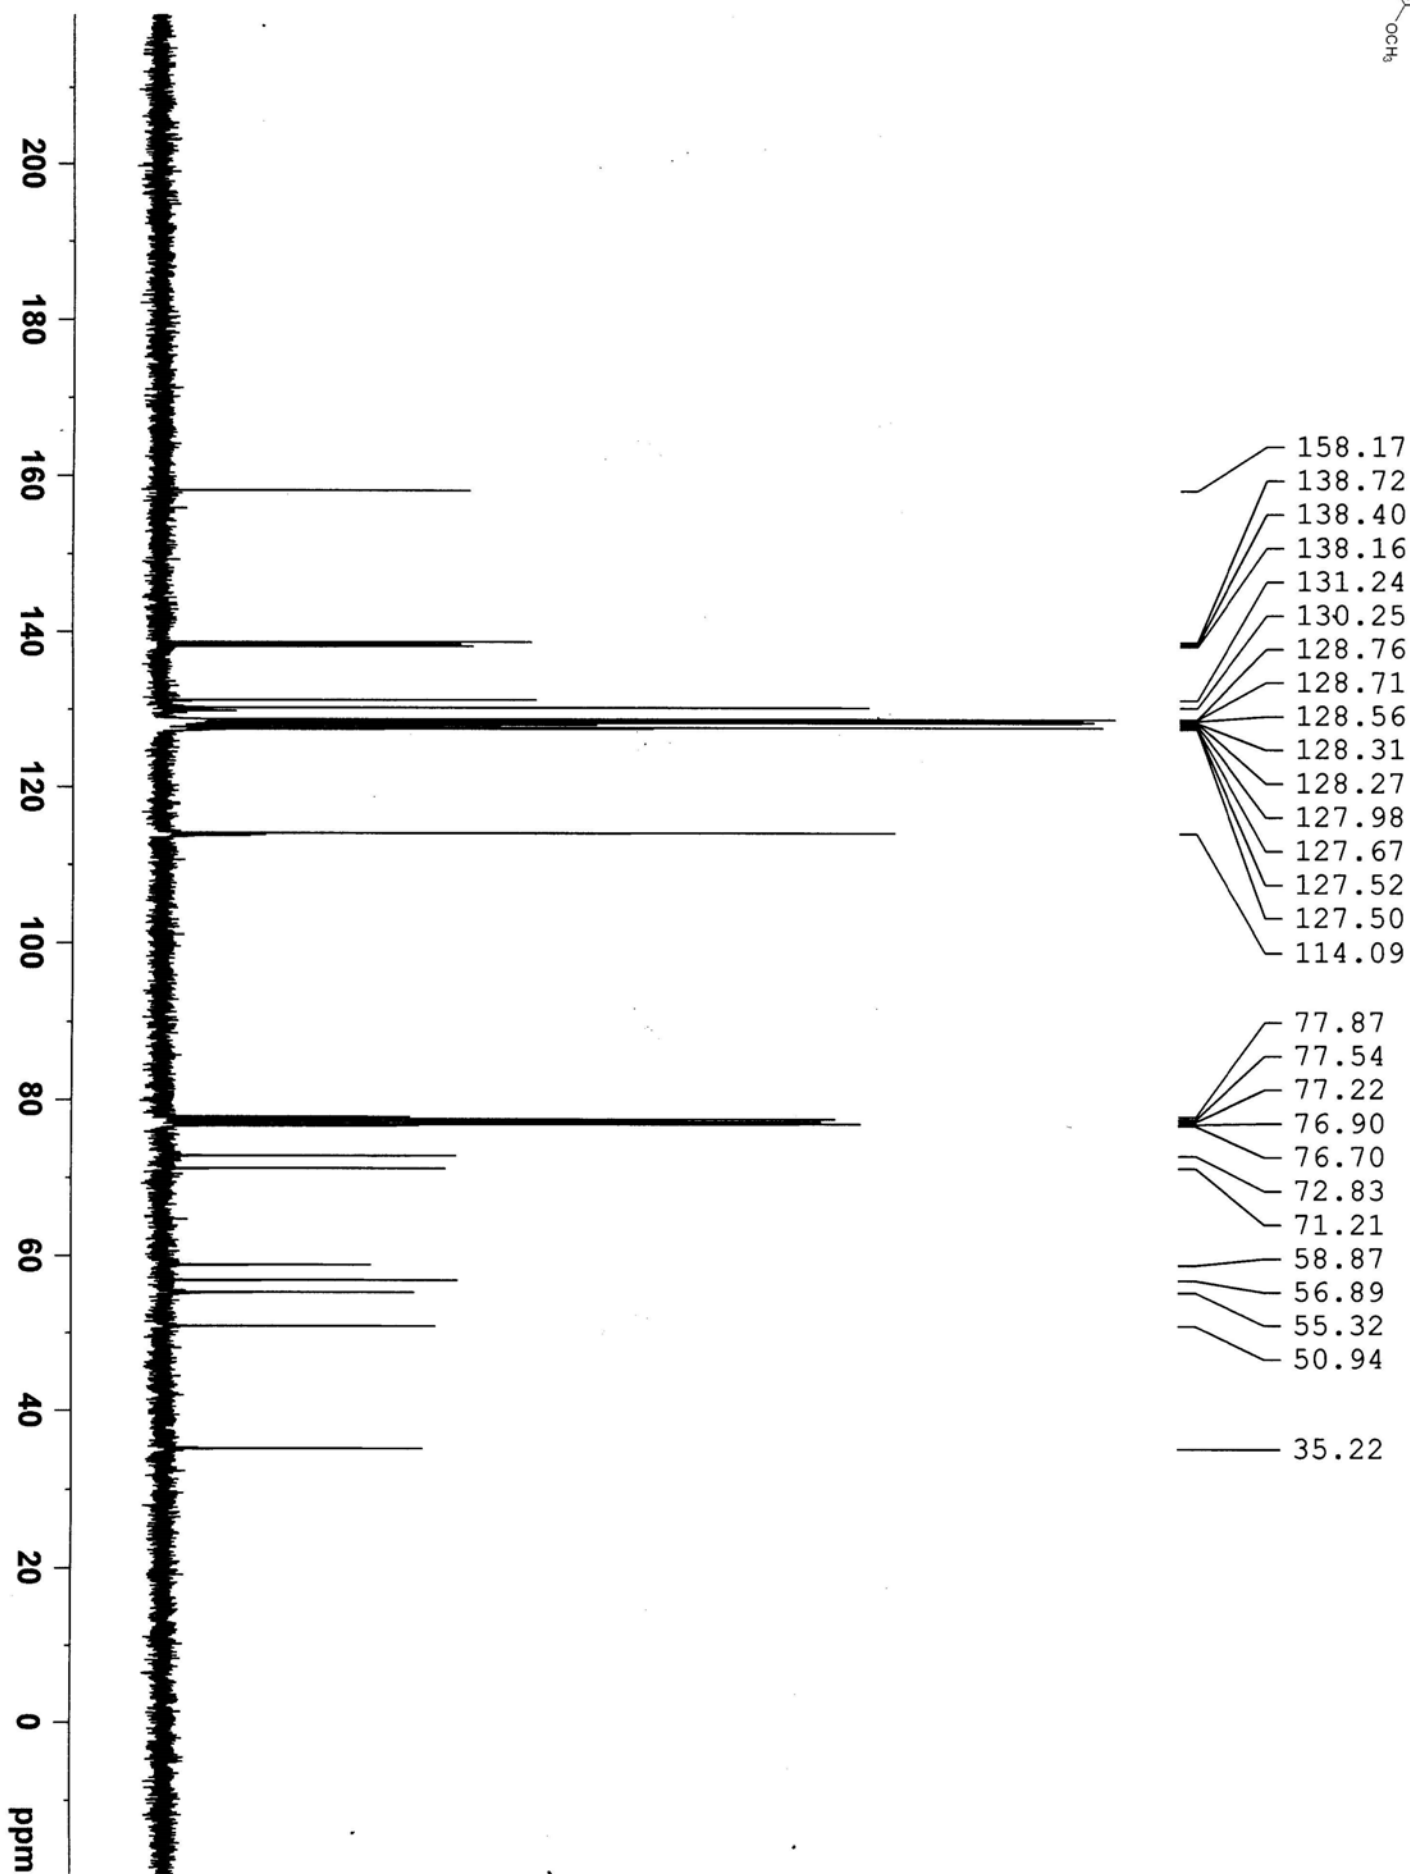

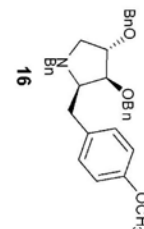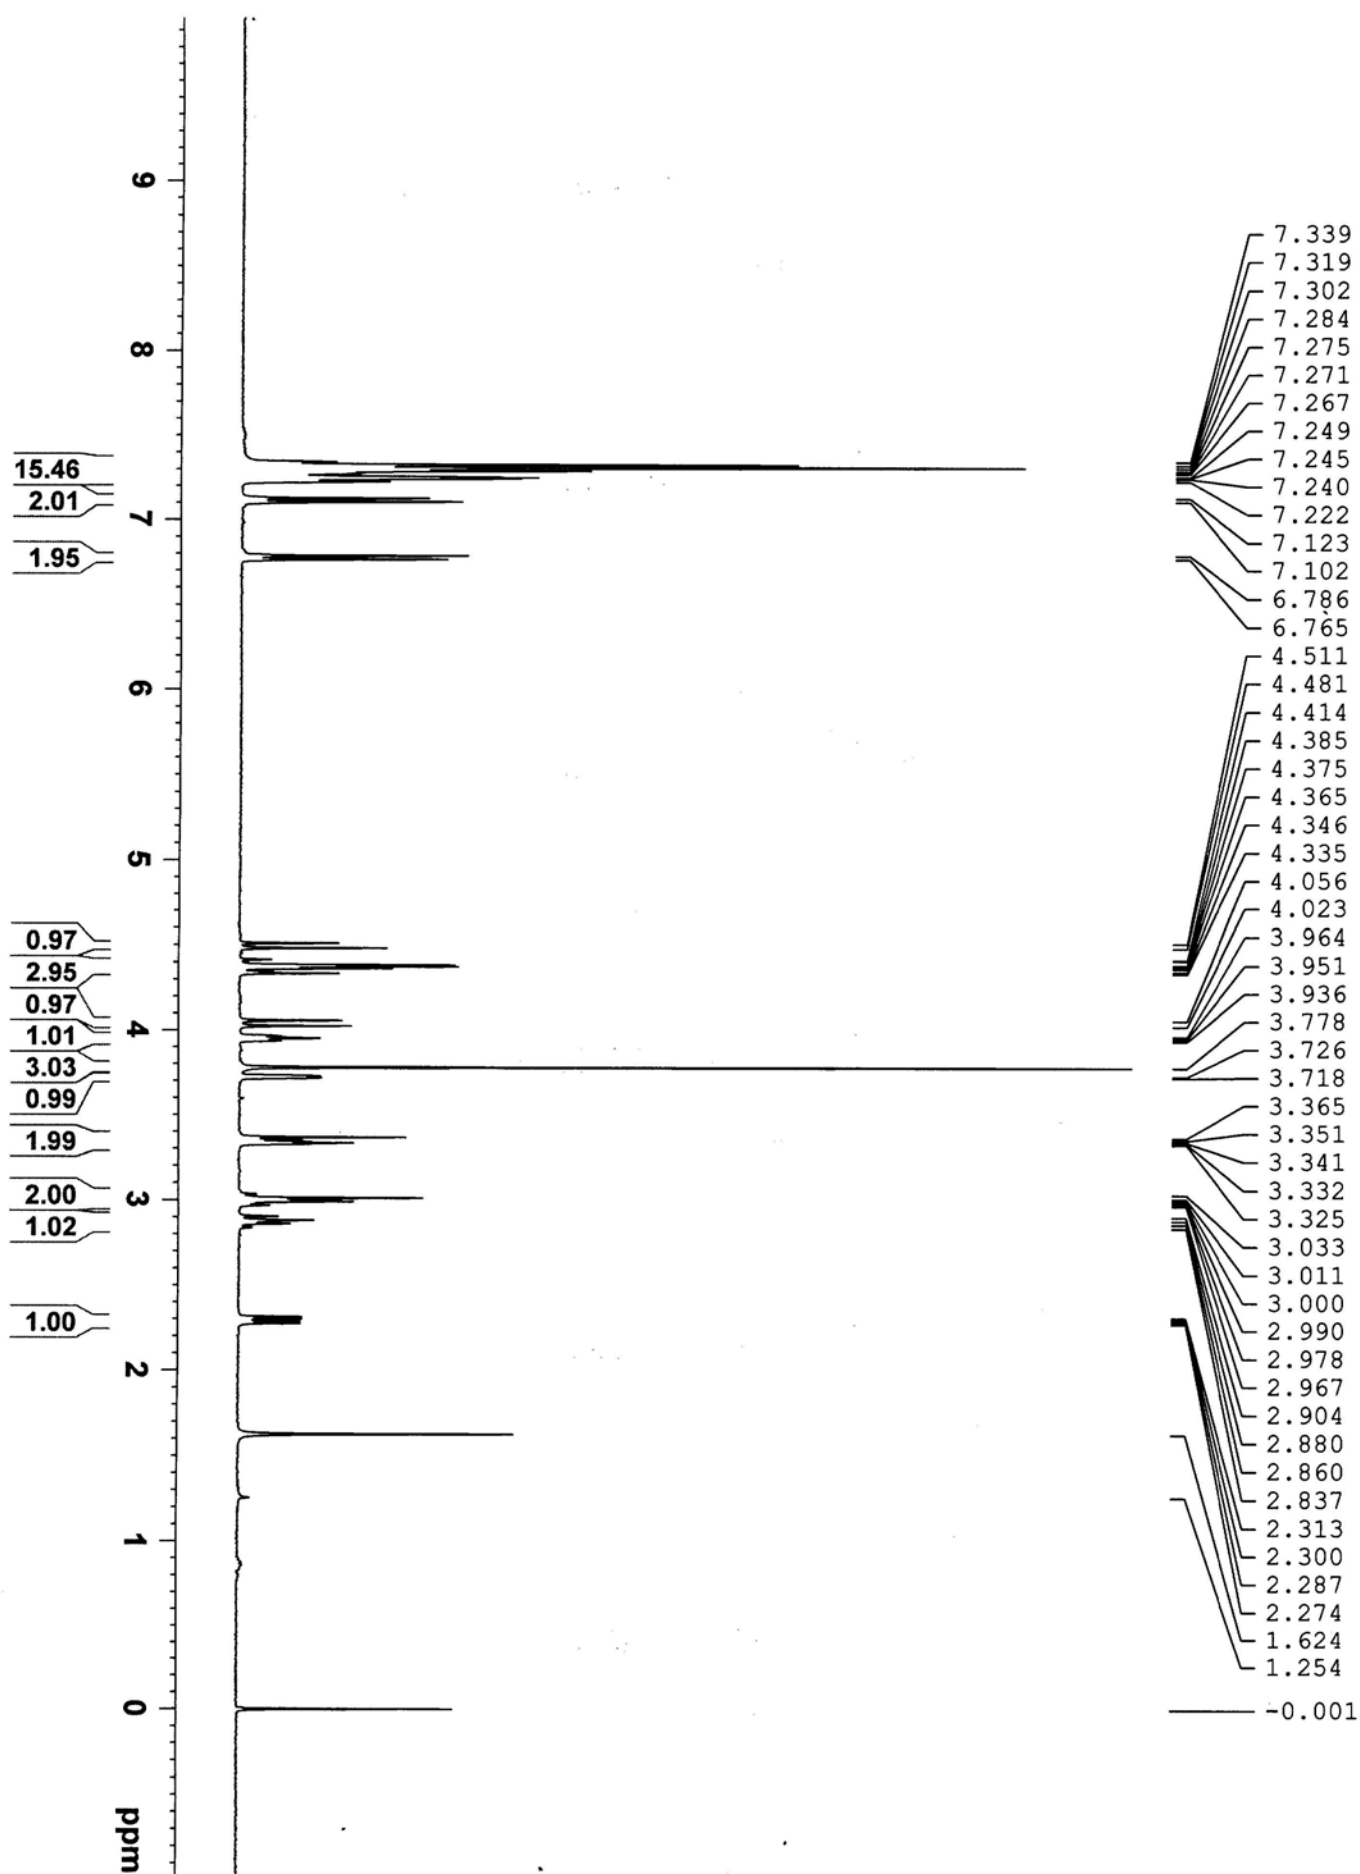

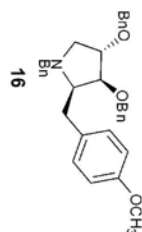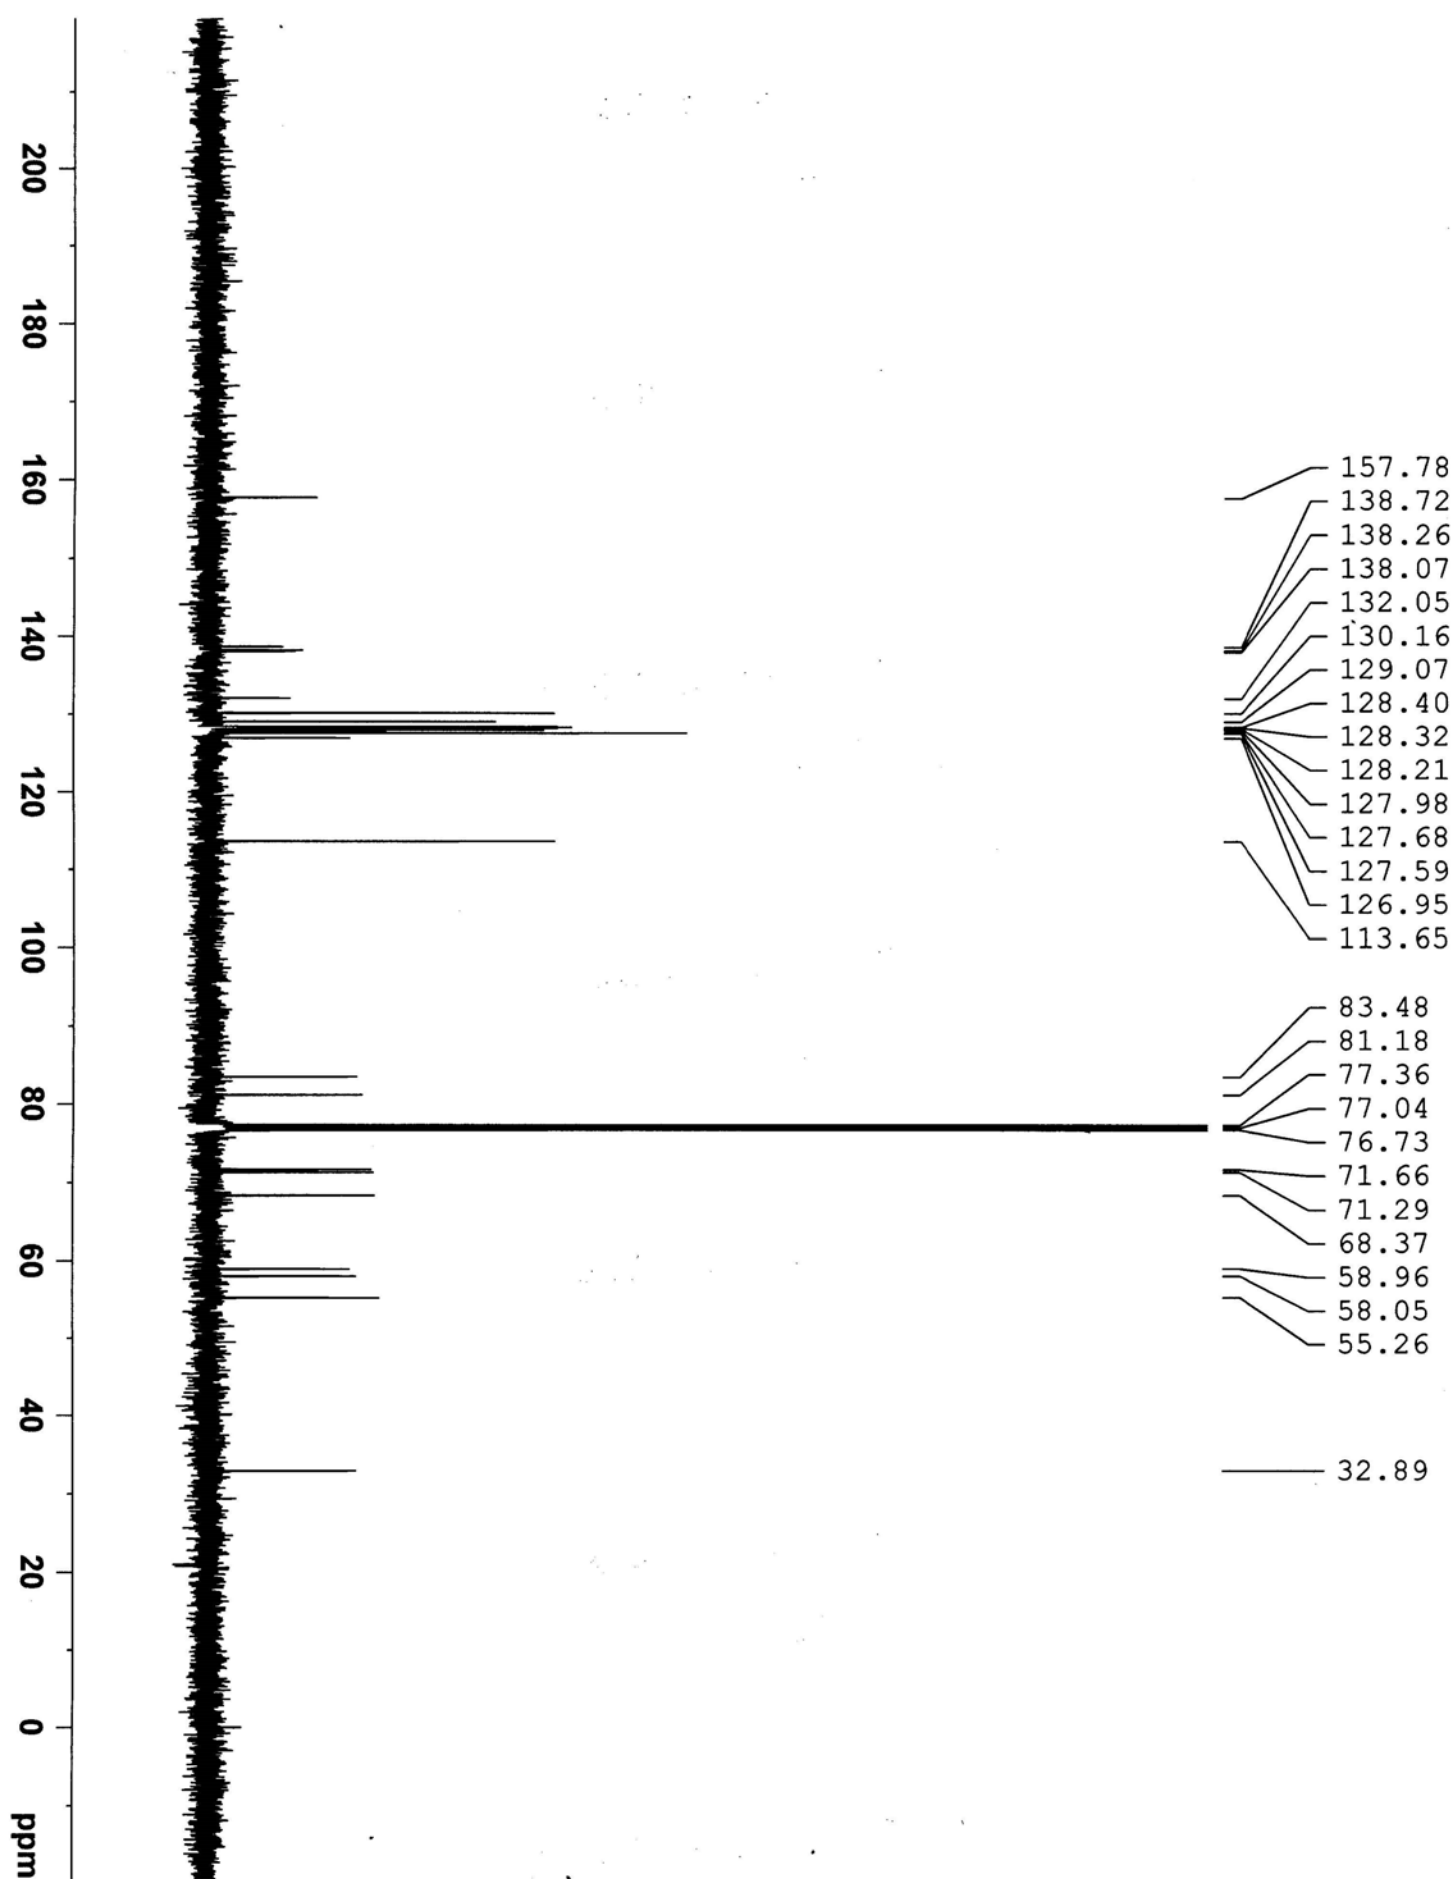

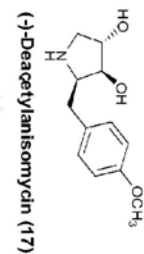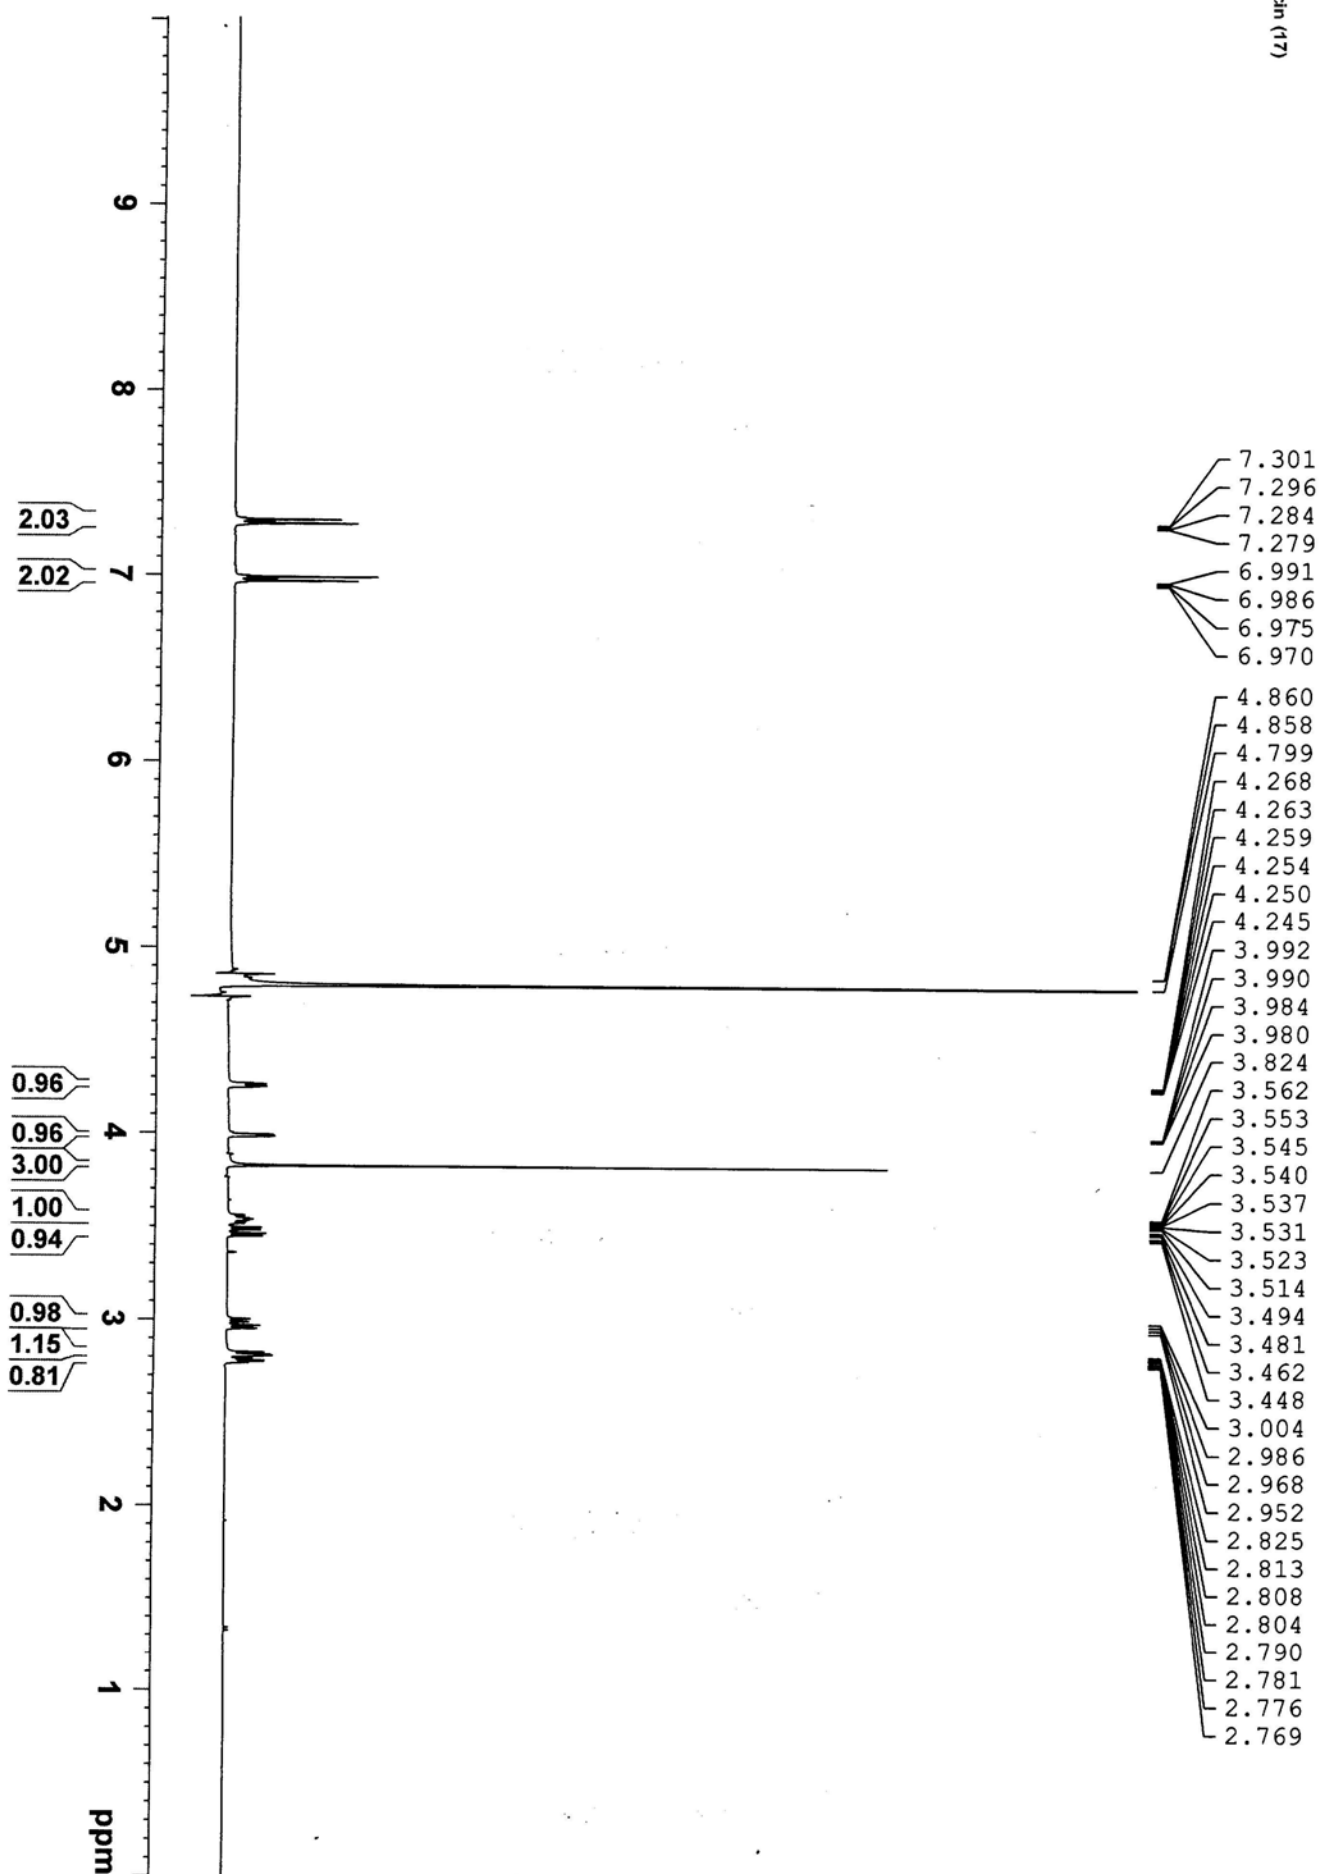



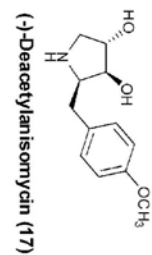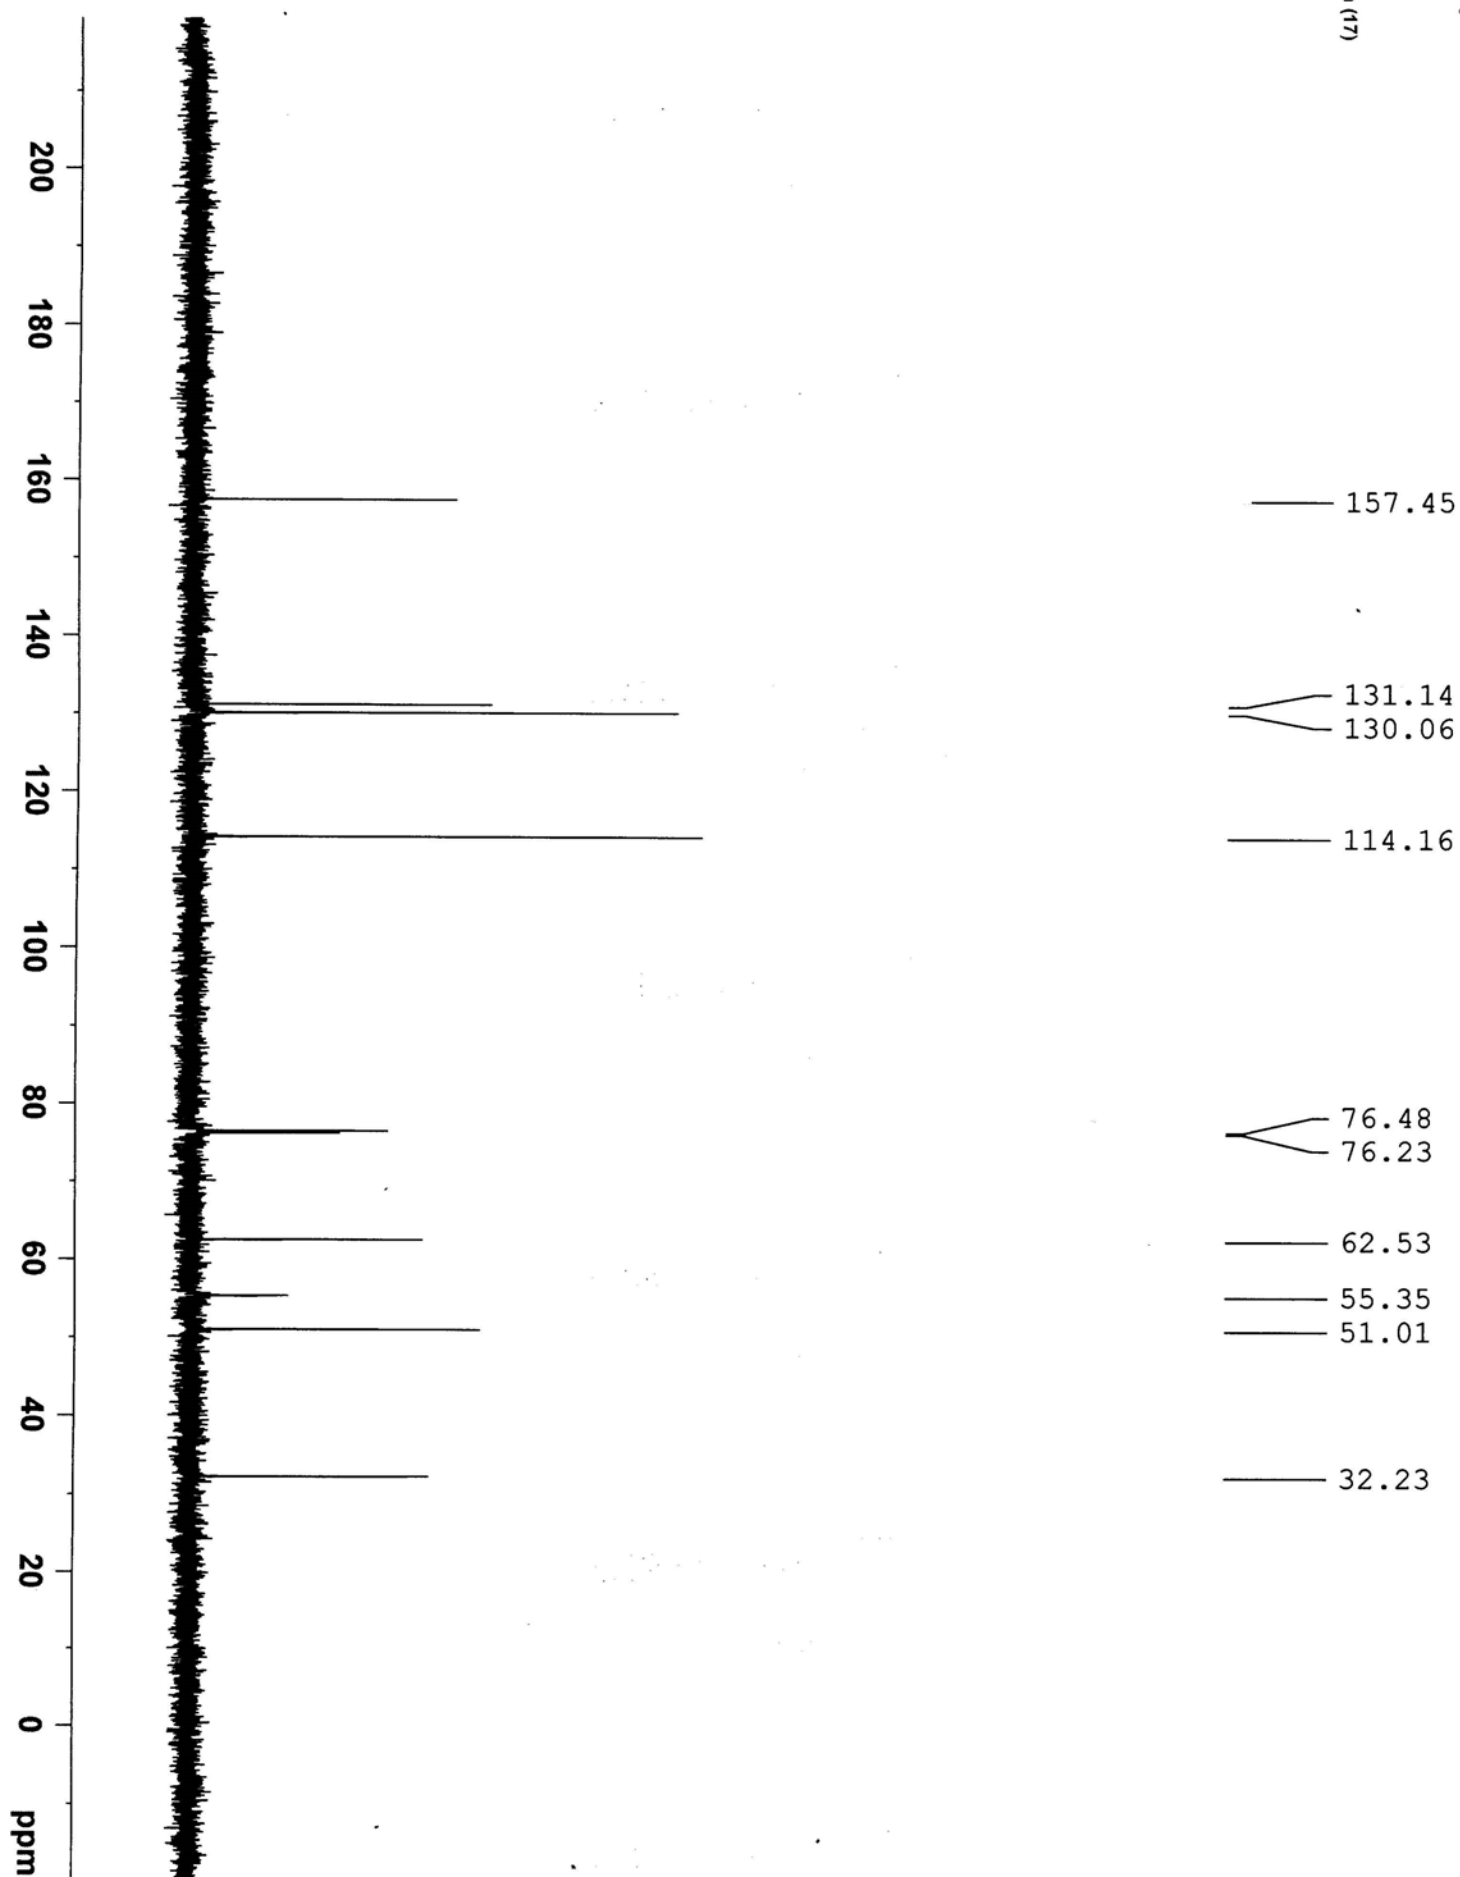

Supplement: c3ra43232g.pdf [file c3ra43232g.pdf]
